# Supplementary material for: Sex differences in the expression of the endocannabinoid system within V1M cortex and PAG of Sprague Dawley rats
Source: Biol Sex Differ. 2021 Nov 8;12:60. doi: 10.1186/s13293-021-00402-2 (PMC8577021; doi:10.1186/s13293-021-00402-2)
Supplement: Supplementary file 2 — Additional file 2: Table 1. Proteins more prevalent in female PAG. A total of 3396 proteins were more prevalent in female PAG. Of the 3396 proteins with female prevalence, 512 were present at statistically significantly higher levels than in males (highlighted in grey), representing 8.5% of all proteins detected. Table 2. Proteins more prevalent in male PAG. A total of 2449 proteins were more prevalent in male PAG. In males, 218 proteins were expressed at significantly higher levels as compared to female (3.6% of all proteins detected) (highlighted in grey). Table 3. List of proteins detected in PAG samples without sex-differences. 164 proteins showed no sex difference in expression. Table 4. Fold differences. 595 proteins showed a fold difference of 1.2 or greater with more than 75% being detected at higher levels in female PAG. Table 5. GO-MF Female analysis. Gene ontology (GO) enrichment analysis of the significantly affected proteins in female PAG using the bioinformatic database DAVID was performed for GO-Molecular Function (MF). The top 10 category is highlighted. Table 6. GO-BP female analysis. Gene ontology (GO) enrichment analysis of the significantly affected proteins in female PAG using the bioinformatic database DAVID was performed for GO-Biological Processes (BP). The top 10 category is highlighted. Table 7. GO-KEGG female analysis. Gene ontology (GO) enrichment analysis of the significantly affected proteins in female PAG using the bioinformatic database DAVID was performed for GO-KEGG pathways. The top 10 category is highlighted. Table 8. GO-MF male analysis. Gene ontology (GO) enrichment analysis of the significantly affected proteins in male PAG using the bioinformatic database DAVID was performed for GO-Molecular Function (MF). The top 10 category is highlighted. Table 9. GO-BP male analysis. Gene ontology (GO) enrichment analysis of the significantly affected proteins in male PAG using the bioinformatic database DAVID was performed for GO-Biologic [file 13293_2021_402_MOESM2_ESM.xlsx]

## Sheet: Additional Table 1
Female Highest
Highlighted= statistically significant
Accession
PCLI1_MOUSE
KANK4_MOUSE
ATX2L_MOUSE
PTGDS_RAT
PSME1_MOUSE
CC124_MOUSE
MTNB_MOUSE
PITH1_MOUSE
DCPS_MOUSE
PBDC1_MOUSE
CLAP2_MOUSE
SARNP_MOUSE
FN3K_MOUSE
F16B2_MOUSE
SRRM4_MOUSE
MAP6_MOUSE
ETHE1_MOUSE
REPS2_MOUSE
AB17C_MOUSE
SMAP_MOUSE
NIT2_MOUSE
PPT1_MOUSE
PA1B3_MOUSE
AUHM_MOUSE
HPLN2_MOUSE
K1107_MOUSE
LIMK1_MOUSE
NC2A_MOUSE
PLCX3_MOUSE
CNOT7_MOUSE
RM04_MOUSE
SRSF7_MOUSE
OSGEP_MOUSE
CB069_MOUSE
E41L5_MOUSE
RAB23_MOUSE
NEUFC_MOUSE
MECP2_MOUSE
DCXR_MOUSE
PUM1_MOUSE
ALD2_MOUSE
CATZ_MOUSE
PALM3_MOUSE
CH037_MOUSE
MRP1_MOUSE
CK068_MOUSE
DESI1_MOUSE
MBD3_MOUSE
TAM41_MOUSE
ECH1_MOUSE
SRPRB_MOUSE
OXSM_MOUSE
G3P_MOUSE;G3PT_MOUSE;G3PT_RAT
TTC19_MOUSE
NCBP1_MOUSE
TTC9B_MOUSE
DLGP4_MOUSE;DLGP2_RAT
DNJC9_MOUSE
RENR_MOUSE
ESTD_MOUSE
DAB1_MOUSE
RABL6_MOUSE
CLIC1_MOUSE
LRFN4_MOUSE
SHAN2_RAT
TIM50_MOUSE
ARHG6_MOUSE
MCATL_MOUSE
PP2AA_MOUSE;PP2AA_RAT
R7BP_MOUSE
CCS_MOUSE
HTRA2_MOUSE;HTRA4_MOUSE
SNAA_MOUSE
RM46_MOUSE
RASL2_MOUSE
PBLD1_MOUSE
PP2AB_MOUSE
AKCL2_MOUSE
RAB30_MOUSE
PSME2_MOUSE
MARE2_MOUSE;MARE2_RAT
ANXA4_MOUSE
PNPT1_MOUSE
GA2L1_MOUSE
AT1A4_MOUSE
CNTP2_MOUSE
PLPL8_MOUSE
RHG23_MOUSE;RHG21_MOUSE
HDAC5_MOUSE
MYPT1_MOUSE
MGLL_MOUSE
NU153_RAT
SC31A_MOUSE
MAGI3_MOUSE;MAGI3_RAT
GRB2_MOUSE
INADL_MOUSE
PPAL_MOUSE
UQCC1_MOUSE
PRPK_MOUSE
DDAH1_MOUSE
DLGP2_MOUSE
U119A_MOUSE;U119B_MOUSE
BACD1_MOUSE;BACD2_MOUSE
NAA11_MOUSE
IAH1_MOUSE
XRP2_MOUSE
BEGIN_MOUSE
U2AF1_MOUSE
ERGI1_MOUSE
MRE11_MOUSE
SRCN1_MOUSE
MIC27_MOUSE
NUP35_MOUSE
PLCD1_MOUSE
STA10_MOUSE
RBM27_MOUSE
MINK1_RAT
RM02_MOUSE
SIR5_MOUSE
GPM6A_MOUSE;GPM6A_RAT
ICAL_MOUSE
GMPR1_MOUSE
RHG06_MOUSE
CTND2_MOUSE;CTND2_RAT
EPDR1_MOUSE
RGS17_MOUSE
NFM_MOUSE
RBL2A_MOUSE
ANM9_MOUSE
1433E_MOUSE;1433E_RAT
NUFP2_MOUSE
UD3A1_MOUSE
PMVK_MOUSE
PPCS_MOUSE
VCIP1_MOUSE
RUVB1_MOUSE
STIM1_MOUSE
NUMBL_MOUSE
PYC_MOUSE
NMRL1_MOUSE
THTM_MOUSE
ASAP2_MOUSE
ARPC2_MOUSE
KC1D_MOUSE
FA49B_MOUSE
TAOK2_MOUSE
MPP6_MOUSE
SEC13_MOUSE
AMPE_MOUSE
ALD1_MOUSE
YLPM1_RAT
TF2B_MOUSE
LIMC1_MOUSE
RC3H1_MOUSE
GSTM3_MOUSE
PANX2_MOUSE
BAP31_MOUSE
MDHC_MOUSE;MDHC_RAT
QRIC1_MOUSE
PUR8_MOUSE
RALA_MOUSE
PHYD1_MOUSE
P85A_MOUSE;P55G_MOUSE
ELP1_MOUSE
PHB_MOUSE
SAP3_MOUSE
E41L1_RAT
LYSM1_MOUSE
CELR2_RAT
CAD11_MOUSE;CAD12_MOUSE;CAD24_MOUSE
HINT3_MOUSE
PDK1_MOUSE
HIP1R_MOUSE
RPR1B_MOUSE
PDLI3_MOUSE
SQOR_MOUSE
CUL5_MOUSE
ST4A1_MOUSE
PLPP_MOUSE
VDAC1_MOUSE;VDAC1_RAT
ALDR_MOUSE;AK1CD_MOUSE
CPSF5_MOUSE
ARFRP_MOUSE
GBB2_MOUSE
P5CR3_MOUSE
IL21R_MOUSE
GBB1_MOUSE;GBB1_RAT
CACB1_MOUSE;CACB2_MOUSE
PLCL1_MOUSE
UMPS_MOUSE
MTCH2_MOUSE
MYO6_MOUSE
MILK1_MOUSE
ANXA3_MOUSE
PECR_MOUSE
ISOC1_MOUSE;ISOC1_RAT
ATX2_MOUSE
RB27B_MOUSE;RB27A_MOUSE
ARBK1_MOUSE
GTF2I_MOUSE;GT2D2_MOUSE
SNP23_MOUSE
RIPR1_RAT
NIT1_MOUSE
LCA5_MOUSE
COX11_MOUSE
NUMB_MOUSE
HDAC4_MOUSE
RBM22_MOUSE
GSLG1_MOUSE
GIT2_MOUSE
NCBP3_MOUSE
LIPA3_MOUSE
TAB1_MOUSE
RAB5B_MOUSE
WDR82_MOUSE
ATAT_MOUSE
5NTD_MOUSE
IFT25_MOUSE
RALB_MOUSE
HMGB1_MOUSE
FCGR1_MOUSE
R3HD2_MOUSE
LDHB_MOUSE
ROA0_MOUSE
UCHL1_MOUSE
ST1D1_MOUSE
NCAM1_MOUSE
RS27A_MOUSE;RS27A_RAT
XPO5_MOUSE
APC_RAT
SRSF1_MOUSE
NDUA9_MOUSE;IL19_MOUSE
ROA1_MOUSE
WDR5_MOUSE
SPEE_MOUSE
SCN2B_MOUSE
ATPF2_MOUSE
GCR_MOUSE
CCAR1_MOUSE
PP2BB_MOUSE
MARK4_MOUSE
EMD_MOUSE
AN13A_MOUSE
RPC8_MOUSE
PLOD3_MOUSE
AAKG2_MOUSE
DEN2A_MOUSE
PSA4_MOUSE
CDK14_MOUSE
AL3B1_MOUSE;AL3B2_MOUSE
CADH2_MOUSE;CADH2_RAT
KSR2_MOUSE
MAAI_MOUSE
SUCB2_MOUSE
CAZA2_MOUSE;CAZA1_RAT;CAZA2_RAT
NU4M_RAT
RANB3_MOUSE
PLPHP_MOUSE
FGFR3_MOUSE;FGFR1_MOUSE;FGFR2_MOUSE
SNAB_MOUSE
ACY1_MOUSE
GAL3A_MOUSE
DAB2P_MOUSE
CSN6_MOUSE
CUL4A_MOUSE
FLII_MOUSE
MAP9_MOUSE
ABI1_MOUSE
TOLIP_MOUSE;TOLIP_RAT
FMNL2_MOUSE;FMNL3_MOUSE
HDHD2_MOUSE
GRHPR_MOUSE
KBTBB_MOUSE
ICEF1_MOUSE
TRA2A_MOUSE
ASPP1_MOUSE
MBP_RAT
CSN7A_MOUSE
CE051_MOUSE
PPP6_MOUSE
CYAC3_MOUSE
EI2BE_MOUSE
HCD2_MOUSE;HCD2_RAT
FA92A_MOUSE
ITA6_MOUSE
FCHO1_MOUSE
SGIP1_MOUSE
PCID2_MOUSE
ORN_MOUSE
FA49A_MOUSE
EI2BA_MOUSE
ATPG_MOUSE
RABE1_MOUSE
PEX5_MOUSE
STAG2_MOUSE;STAG1_MOUSE
CRYL1_MOUSE
SYIC_MOUSE
PCNA_MOUSE
ROGDI_MOUSE
SRGP1_MOUSE
CAAP1_MOUSE
RPAB1_MOUSE
PP1G_MOUSE
C2D1B_MOUSE
CSRP1_MOUSE
IMPA1_MOUSE
EXOC8_MOUSE
TMX1_MOUSE
HAX1_MOUSE
TPIS_MOUSE
UCK1_MOUSE
RAB6A_MOUSE
RAB28_MOUSE
KAP0_MOUSE
ABHD6_MOUSE
CDK5_MOUSE
PLP2_MOUSE
K2C8_MOUSE
GDPD1_MOUSE
ELP5_MOUSE
LCAP_MOUSE
SGCD_MOUSE
TSC1_MOUSE
NCOA7_MOUSE
PA1B2_MOUSE
ENPP6_RAT
GBB4_MOUSE
AGRL2_RAT
AKTIP_MOUSE
F1712_MOUSE
AN32E_MOUSE
VDAC2_MOUSE;VDAC2_RAT
VIGLN_MOUSE
L1CAM_MOUSE
COMT_MOUSE
P5CR2_MOUSE;P5CR1_MOUSE
PSA1_MOUSE
CSK2B_MOUSE
ODPB_MOUSE
UFSP2_MOUSE
ARMC9_MOUSE
RED_MOUSE
DCC_RAT;DCC_MOUSE
ARFG2_MOUSE
TUB_MOUSE;TULP1_MOUSE
TPPP_MOUSE
HCFC1_MOUSE
STX4_MOUSE
3HIDH_MOUSE
DPCD_MOUSE
RDH14_MOUSE;RDH12_MOUSE
CLVS2_MOUSE
LMAN2_MOUSE
1433G_MOUSE;1433G_RAT
CAPS1_MOUSE
K319L_MOUSE
CDK16_MOUSE
IQEC1_MOUSE;IQEC2_MOUSE
DCTN1_MOUSE
MARE3_MOUSE
PCDG4_MOUSE
SHSA4_MOUSE
DBND1_MOUSE
DNJC5_MOUSE;DNJC5_RAT
SF3B1_MOUSE
FLOT2_MOUSE
OXR1_MOUSE
DCTN3_MOUSE
FLIP1_MOUSE
RB3GP_MOUSE;RB3GP_RAT
MYO1E_MOUSE;MYO1F_MOUSE
PHAR4_MOUSE
PUR4_MOUSE
APT_MOUSE
GALM_MOUSE
ENOPH_MOUSE
SMBP2_MOUSE
DHRS7_MOUSE
AAKG1_MOUSE
AKAP5_MOUSE
E41L3_MOUSE
SCAF8_RAT
DHE3_MOUSE;DHE3_RAT
SYT12_MOUSE
DCNL3_MOUSE
PGES2_MOUSE
TF65_MOUSE
MP2K6_MOUSE;MP2K3_MOUSE
PGTB2_MOUSE
KS6B1_MOUSE
IMPCT_MOUSE
ZCHC8_MOUSE
RPTOR_MOUSE;SNX20_RAT
AMER2_MOUSE
TCPB_RAT
CP110_MOUSE
APBA1_MOUSE;APBA1_RAT
CHAP1_MOUSE
ILEUA_MOUSE
UFL1_MOUSE
UBP8_MOUSE
XRN2_MOUSE
ECHD1_MOUSE
UBE4B_MOUSE
RAE1L_MOUSE
GET4_MOUSE
RACK1_MOUSE
OPLA_MOUSE;OPLA_RAT
SE6L2_MOUSE
FBX30_MOUSE
ASGL1_MOUSE
NIPS1_MOUSE
ANS1A_MOUSE
NB5R3_MOUSE
SMCE1_MOUSE
ABCA5_MOUSE
MYEF2_MOUSE
CAZA1_MOUSE
PEF1_MOUSE
SRGP3_MOUSE
THNS2_MOUSE
CADM4_MOUSE;CADM4_RAT
SNX24_MOUSE
A1AT2_MOUSE
MDHM_MOUSE;MDHM_RAT
EFMT2_MOUSE
CSTF3_MOUSE
ASPH_MOUSE
MDGA1_MOUSE
BCAR1_MOUSE
S2542_MOUSE
NYAP1_MOUSE
NUBPL_MOUSE
PHLB1_RAT
ANS1B_MOUSE
ETFA_MOUSE
NHLC2_MOUSE
KC1E_MOUSE
PSA6_MOUSE
BAG2_MOUSE
TET5C_RAT
LIMS1_MOUSE
LRRT1_MOUSE
PTN11_MOUSE
PDXK_MOUSE
DECR_MOUSE
PDLI4_MOUSE
DRC11_MOUSE
AIMP1_MOUSE
MTSSL_MOUSE
PACS1_MOUSE
AN32B_MOUSE
NUP37_MOUSE
KPCD1_MOUSE
HYOU1_MOUSE
CLVS1_MOUSE
PLXB1_MOUSE;PLXB3_MOUSE
RHG17_MOUSE
S2536_MOUSE;S2533_MOUSE
COG7_MOUSE
MK01_MOUSE;MK04_MOUSE
BRCC3_MOUSE
ACD10_MOUSE
MBLC2_MOUSE
RM28_MOUSE
NPL_MOUSE
CAH10_MOUSE
AMPN_MOUSE
FRIL2_MOUSE;FRIL1_MOUSE
DNPEP_MOUSE
CALY_MOUSE
COQ3_MOUSE
PRPS2_MOUSE
SFXN3_MOUSE
DTNA_MOUSE
ELAV1_MOUSE
RAB36_MOUSE
MYD88_MOUSE
NED4L_MOUSE
RM16_MOUSE
F126B_MOUSE
RUSD4_MOUSE
IP6K1_MOUSE
HMGCL_MOUSE
ARK72_MOUSE
SIR3_MOUSE
PTPRF_MOUSE
RBM10_MOUSE
RT10_MOUSE
MET13_MOUSE
XDH_MOUSE
ANKL2_MOUSE
4F2_MOUSE
SMAD4_MOUSE
MOG_RAT
THOC4_MOUSE;ALRF2_MOUSE
GNPI2_MOUSE
CBARP_MOUSE
CTCF_MOUSE
MAP4_MOUSE
DEOC_MOUSE
PLCG1_MOUSE
EPN2_MOUSE
MAGI1_MOUSE
S2540_MOUSE
CHM1A_MOUSE
MADD_RAT
M3K7_MOUSE
PRS6B_MOUSE
NACA_MOUSE;NACAM_MOUSE
CAST2_MOUSE
SDCB1_MOUSE
PRRT1_MOUSE
OTUB1_MOUSE;OTUB1_RAT
AIP_MOUSE
STX1B_MOUSE;STX1B_RAT;STX2_RAT
RGRF1_MOUSE
PHB2_MOUSE;PHB2_RAT
MPC1_RAT
KCD21_MOUSE
TPR_RAT
ARVC_MOUSE
RASH_MOUSE;RASH_RAT
DCMC_MOUSE
GNPI1_MOUSE
CENPV_MOUSE
MSPD1_MOUSE
AP3B1_MOUSE
ZFYV1_MOUSE
CD82_RAT;CD82_MOUSE
CAMP2_RAT;CAMP2_MOUSE
RS3A_MOUSE
LRRC7_RAT;LRRC7_MOUSE
VP37B_MOUSE
DHB12_MOUSE
RLA0_MOUSE
SPART_MOUSE
RB6I2_MOUSE
SLIK4_MOUSE
T132A_MOUSE
PACS2_MOUSE
GFPT1_MOUSE;GFPT2_MOUSE
EGFR_MOUSE
VPS50_MOUSE
SSRA_MOUSE
HACL1_MOUSE
NOL3_MOUSE
NAV1_MOUSE
HCDH_MOUSE
KLH11_MOUSE
RS2_MOUSE;RS2_RAT
ABCF3_MOUSE
AVL9_MOUSE
CNTN4_MOUSE
AGRL3_MOUSE
TSNAX_MOUSE
MTA70_MOUSE
MD1L1_MOUSE
KCNC4_RAT;KCNC4_MOUSE
LRC63_RAT
PIPNA_MOUSE
INPP_MOUSE
RN123_MOUSE
MARK1_MOUSE
CATD_MOUSE
VATD_MOUSE
PDLI1_MOUSE
ACSM2_RAT
USE1_MOUSE
EFTU_MOUSE
RND2_MOUSE
PALM2_MOUSE
SMAG1_MOUSE
MTAP_MOUSE
DHX9_MOUSE
ZN428_MOUSE
SFXN5_MOUSE;SFXN5_RAT
ARBK2_MOUSE
MEMO1_MOUSE
C2D1A_MOUSE
CB072_MOUSE
BSN_RAT
SPG21_MOUSE
AASS_MOUSE
CP131_MOUSE
DEN5B_MOUSE
E41L2_MOUSE
AKIB1_MOUSE
ARHGB_RAT
COPA_MOUSE
FAHD1_MOUSE
SPT5H_MOUSE
DHRS1_MOUSE
PSD2_MOUSE
BPHL_MOUSE
CAH2_MOUSE
6PGL_MOUSE
CELF4_MOUSE;CELF6_MOUSE
CNTN2_MOUSE
KS6A1_MOUSE
VAPA_MOUSE
PHOP2_MOUSE
MTMR1_MOUSE
MTSS1_MOUSE
UB2R2_MOUSE
PDXL2_MOUSE
RELCH_MOUSE
CFA57_MOUSE
F16B1_MOUSE
ACOT8_RAT;ACOT8_MOUSE
CIA30_MOUSE
RHG27_MOUSE
APC10_MOUSE
ATAD1_MOUSE
IF4G2_MOUSE
S14L1_MOUSE
LRC59_MOUSE
STX17_MOUSE
ADCK1_MOUSE
UBE3A_MOUSE
GNAI2_MOUSE;GNAI2_RAT;GNAT2_MOUSE;GNAT1_MOUSE
GALD1_MOUSE
CTDS1_MOUSE
SNP25_MOUSE;SNP25_RAT
FXL15_MOUSE
AMACR_MOUSE
MTMRA_MOUSE
ALDH2_MOUSE;AL1A3_MOUSE
P4K2A_MOUSE
DHR11_MOUSE
DENR_MOUSE
HGS_MOUSE
CFDP1_MOUSE
ODBB_MOUSE
CK049_MOUSE
STX6_MOUSE
CC90B_MOUSE
ULK1_MOUSE
SETD4_MOUSE
PLCB1_MOUSE
BRAF_MOUSE
VINEX_MOUSE
KS6A4_MOUSE
AAKB2_MOUSE
RL29_MOUSE
GLP3L_MOUSE
FMNL1_MOUSE
DJC21_MOUSE
RBM26_MOUSE
PEX1_MOUSE
MB12A_MOUSE
UTP20_MOUSE
GSH0_MOUSE
FBRL_MOUSE
ACPM_MOUSE
PNPH_MOUSE
GP119_MOUSE
PIR_MOUSE
RALYL_MOUSE
THTPA_MOUSE
NU3M_RAT
LPIN1_MOUSE
SNX29_MOUSE
SYQ_RAT
RHG12_MOUSE
DDAH2_MOUSE
PPM1L_MOUSE
GLO2_MOUSE
DVL1_MOUSE;DVL3_MOUSE
NUD18_RAT;NUD18_MOUSE
CNNM3_MOUSE
VATE1_MOUSE;VATE2_MOUSE
TRA2B_MOUSE
TFP11_MOUSE
RBM14_MOUSE
AGRB1_RAT
GOLP3_MOUSE
KAD2_MOUSE
HEPH_MOUSE
CLAT_MOUSE
SMC3_MOUSE;SMC3_RAT
ERCC1_MOUSE
P5CS_MOUSE
SEN34_MOUSE
MPP5_MOUSE
CBPC1_MOUSE
SURF1_MOUSE
CDK17_MOUSE
ECI1_MOUSE
CDC73_MOUSE
MAN1_MOUSE
RPAP3_MOUSE
GSHB_MOUSE
NNRE_MOUSE
FKBP9_MOUSE
3BP1_MOUSE
NUD14_MOUSE
SARDH_MOUSE
AL1B1_MOUSE
SIAE_MOUSE
E41L1_MOUSE
GSTO1_MOUSE
RS6_MOUSE
H1BP3_MOUSE
DEK_MOUSE
LIPB1_MOUSE
KIF2A_MOUSE;KIF2A_RAT;KIF2C_MOUSE
MIC60_RAT
SYMPK_MOUSE
68MP_RAT
SHIP2_MOUSE
LST8_MOUSE
ADA10_MOUSE
MOGS_MOUSE
GSH1_MOUSE
CE112_MOUSE
EMC2_MOUSE
AKAP6_RAT
TOIP2_MOUSE
RM45_MOUSE
ECHM_MOUSE
I2BPL_MOUSE
PSDE_MOUSE
NRIP2_MOUSE
NFYB_MOUSE
TBG1_MOUSE;TBG2_MOUSE
FIP1_MOUSE
PP16B_MOUSE
TBB4B_MOUSE;TBB4B_RAT
NEDD4_MOUSE
LMCD1_MOUSE
SUCB1_MOUSE
NTM1A_MOUSE
GNAI3_MOUSE
AIDA_MOUSE
PGAM1_MOUSE;PGAM2_MOUSE;PGAM1_RAT
CEP97_MOUSE
IL6RB_MOUSE
AP2B1_MOUSE;AP2B1_RAT
EIF3I_MOUSE
PHLP1_RAT
TIF1B_MOUSE;TIF1B_RAT
LXN_MOUSE
IGSF8_MOUSE
EFL1_MOUSE
CNTN3_MOUSE
OSBL3_MOUSE
NDUB8_MOUSE
ARFG3_MOUSE
SRGP2_MOUSE
RT34_MOUSE
LZTS3_MOUSE
TSN_MOUSE
IPO4_MOUSE
MPRIP_RAT;MPRIP_MOUSE
ABHEB_MOUSE
IF2P_RAT
ANR46_MOUSE
STX1A_MOUSE;STX1A_RAT
ANO10_MOUSE
MA2A2_MOUSE
ASTRA_MOUSE
AKA10_MOUSE
PDS5A_MOUSE
CBL_MOUSE;CBLB_MOUSE
TACO1_MOUSE
RHG26_MOUSE
STK16_MOUSE
NAT9_MOUSE
DDX5_MOUSE
CTTB2_MOUSE
NADC_MOUSE
NCOA5_MOUSE
CDN1B_MOUSE
GDIR2_MOUSE
AT2B2_MOUSE
MFN1_MOUSE
BCL7B_MOUSE
FBXW5_MOUSE
EFHD1_MOUSE
S2551_MOUSE
S6A11_RAT;SC6A6_MOUSE
VAPB_MOUSE
DNJC8_MOUSE
ROA2_MOUSE
CRTC1_MOUSE
T132E_MOUSE
DAAM2_MOUSE
P3C2G_MOUSE
KS6A3_MOUSE
SGSM1_MOUSE;SGSM2_MOUSE
DGKB_MOUSE;DGKA_MOUSE
CLYBL_MOUSE
LMA2L_MOUSE
PRRT3_MOUSE
TENS3_MOUSE;TNS2_MOUSE
NT8F2_RAT
MET16_MOUSE
NLRX1_MOUSE
PDE2A_MOUSE
AMPH_MOUSE
SYLC_MOUSE
PCY2_MOUSE
ABL1_MOUSE
HDGR3_MOUSE
TENR_MOUSE
ANPRB_MOUSE
PTN6_MOUSE
H12_MOUSE;H1T_MOUSE;H14_RAT
CDK18_MOUSE
ARL6_MOUSE
SYGP1_MOUSE;DAB2P_RAT;RASL3_MOUSE
HXK2_MOUSE
UB2R1_MOUSE
CBR3_MOUSE
LRRK2_MOUSE
NYNRI_MOUSE
TUTLB_MOUSE;TUTLB_RAT
PIP30_MOUSE
MIC60_MOUSE
F169A_MOUSE
UBXN7_MOUSE
H13_MOUSE
DCX_MOUSE
BCAT2_MOUSE
BRSK1_MOUSE
FBSP1_MOUSE
MAGI2_MOUSE
DNLI4_MOUSE
FBLL1_MOUSE
RAB2B_MOUSE
MYCN_RAT
PGS1_RAT
PR40B_MOUSE
MECR_MOUSE
LURA1_MOUSE
LIPA2_MOUSE
CKAP4_MOUSE
IFT81_MOUSE
DMD_MOUSE
PEPD_MOUSE
NNRD_MOUSE
CBR1_MOUSE
GPX7_MOUSE
THTR_MOUSE
2AAA_MOUSE;2AAB_RAT
HDHD3_MOUSE
OFUT2_MOUSE
EFTS_MOUSE
EXOS5_MOUSE
CLIP2_MOUSE
NRDC_MOUSE
FLOT2_RAT
PTPR2_MOUSE
PLXB2_MOUSE
RNF31_MOUSE
RIMS2_RAT
ANR28_MOUSE
BORG1_MOUSE
ZER1_MOUSE
SPE39_MOUSE
HPRT_MOUSE
GLYR1_MOUSE
UBP11_MOUSE
OGA_MOUSE
M2OM_MOUSE;M2OM_RAT
F117B_MOUSE
YTHD1_MOUSE
MAFG_MOUSE
ACK1_MOUSE
PP6R3_MOUSE
RL7A_MOUSE;RL7A_RAT
TOR1A_MOUSE
DHB4_MOUSE
5NT3A_MOUSE
BCR_MOUSE
CG043_MOUSE
SMCA4_RAT
RELN_RAT
CHMP6_MOUSE
SNTB2_MOUSE
PDK2_MOUSE
CCD43_MOUSE
TYRO3_MOUSE
TRPM1_RAT
DDX52_MOUSE
STX5_MOUSE
ICA69_MOUSE
RDH13_MOUSE
NTNG1_MOUSE
ASF1A_MOUSE;ASF1B_MOUSE
TANC1_RAT
CLIC4_MOUSE;CLIC4_RAT;CLIC5_MOUSE
AP1B1_MOUSE
EDEM3_MOUSE
CTDP1_MOUSE
UNC80_MOUSE
STK24_MOUSE
PARK7_MOUSE
PYGB_MOUSE;PYGB_RAT
NOS3_MOUSE
C1TM_MOUSE
TBCE_MOUSE
HSC20_MOUSE
BLVRB_MOUSE
TUSC3_MOUSE
LMF2_RAT
TROAP_MOUSE
P2RX7_RAT
ARPIN_MOUSE
LMBD2_MOUSE
KKCC1_MOUSE
ACBD6_MOUSE
RIMS3_MOUSE
CBPQ_MOUSE
NIPS2_MOUSE
SNRK_MOUSE
SF3A1_MOUSE
INT5_MOUSE
PCD19_MOUSE
RBM18_MOUSE
PEX16_MOUSE
DLGP3_MOUSE;DLGP3_RAT
TM245_RAT
BAIP3_MOUSE
NANP_MOUSE
DDX58_MOUSE
RT07_MOUSE
VWA8_MOUSE
NFASC_MOUSE
HXK1_MOUSE;HXK2_RAT;HXK3_MOUSE
CSRP1_RAT
WBP11_MOUSE
SEPT2_MOUSE
PP12C_MOUSE
LDLR_MOUSE
KTN1_MOUSE
NIBL1_MOUSE
AT1B3_MOUSE
OSCP1_MOUSE
PK3C3_MOUSE
GCSP_MOUSE
RGPA2_RAT
RM21_MOUSE
ACTN4_MOUSE;ACTN4_RAT
SNUT1_MOUSE
TNPO3_MOUSE
PGAP1_RAT;PGAP1_MOUSE
RB22A_MOUSE
PPIL2_MOUSE
PDIP3_MOUSE
GNAL_MOUSE
NXF1_MOUSE
ACBD5_MOUSE
HNRL2_MOUSE
NOE2_MOUSE
COPE_MOUSE
SHC2_MOUSE
TPM4_MOUSE
RUSD1_MOUSE
LRRT3_MOUSE
ITSN1_MOUSE
TPPC4_MOUSE
TRIPC_RAT;TRIPC_MOUSE
CHKB_MOUSE
CNTLN_RAT
PGFRB_RAT
CNEP1_RAT
RCC1_MOUSE
PKHA6_MOUSE
ARL15_MOUSE
PLCH1_MOUSE
LMNB2_MOUSE
EXOS3_MOUSE
ACOT2_MOUSE;ACOT1_MOUSE;ACOT2_RAT
SORCN_MOUSE
DRS7B_MOUSE
GTPB1_MOUSE
SH2B1_MOUSE
ZNRF1_MOUSE
RAB1A_MOUSE;RAB1A_RAT
MLEC_MOUSE;MLEC_RAT
DUS28_MOUSE
LIN7A_MOUSE
RSH4A_MOUSE
WIPF2_MOUSE
GPSM1_MOUSE;GPSM2_MOUSE
RIMB2_MOUSE
DPH6_MOUSE
BCLF1_MOUSE
KTNB1_MOUSE
MPI_RAT;MPI_MOUSE
TCF25_MOUSE
FA45A_MOUSE
S12A5_MOUSE
SAC2_MOUSE
RS3_MOUSE;RS3_RAT
MPDZ_RAT
PLAP_RAT
NUDT5_MOUSE
CNOT4_MOUSE
FRS1L_MOUSE
RIFK_MOUSE
CPNS1_MOUSE;CPNS2_MOUSE
DTX3_MOUSE
DYHC2_RAT
PCDH8_MOUSE
SORC1_MOUSE
CNKR2_MOUSE
DYN2_MOUSE;DYN2_RAT
GOLI4_MOUSE
GCYA1_MOUSE
CRYM_MOUSE;CRYM_RAT
WDR47_MOUSE
SPG7_MOUSE
F120C_MOUSE
XPO4_MOUSE
TWF1_MOUSE
MARC2_MOUSE;MARC1_MOUSE
KPB1_MOUSE
SMYD5_MOUSE
LANC2_MOUSE
DCAF8_MOUSE
1433T_MOUSE;1433T_RAT
PHAR1_MOUSE
PNCB_MOUSE
KEAP1_MOUSE
DEN5A_MOUSE
CWC15_MOUSE
VDAC3_MOUSE
DHTK1_MOUSE
GARL3_MOUSE
B2CL1_MOUSE
APBB1_MOUSE;APBB1_RAT
CBLN1_RAT;C1QB_MOUSE;C1QB_RAT
ARHG1_MOUSE
FOLH1_MOUSE
SNRPA_MOUSE
D39U1_MOUSE
RFIP2_MOUSE
AKAP2_RAT
ZFHX2_MOUSE
IQCB1_MOUSE;ASPM_MOUSE
SHAN3_RAT
COPB_MOUSE
NAGK_MOUSE
CA2D1_MOUSE
MAOX_MOUSE
PP6R2_MOUSE
CNOT3_MOUSE
NEB2_MOUSE;CNBD2_MOUSE;NEB2_RAT
NELL2_MOUSE
RN220_MOUSE
SMCA2_MOUSE
LYPA1_MOUSE
CSKI1_RAT
TXNL1_MOUSE
CCM2_MOUSE
MPV17_MOUSE
SYNRG_MOUSE
DP13A_MOUSE
DHPR_MOUSE
NRIP3_MOUSE
MTMR6_MOUSE
NAA10_MOUSE
MPPA_MOUSE
MMAB_MOUSE
CNTFR_MOUSE
PPM1K_MOUSE
MSRA_MOUSE
HS12A_MOUSE
RAB32_MOUSE;RAB38_MOUSE
2A5G_MOUSE
MOCS1_MOUSE
PRDX4_MOUSE
PLPP3_MOUSE
GULP1_MOUSE
GSHR_MOUSE;GSHR_RAT
SYNRG_RAT
ITSN2_MOUSE
NECP2_MOUSE
WDR61_MOUSE
CNST_MOUSE
ARNT2_MOUSE
OSBL9_MOUSE
TTI1_MOUSE
WASH1_MOUSE
SPB6_MOUSE
TPBG_MOUSE
AP2S1_MOUSE
RHOA_MOUSE;RHOA_RAT
SRC8_MOUSE
TATD1_MOUSE
ACSS3_MOUSE
TAU_MOUSE
EAA5_MOUSE
ARXS1_MOUSE
ACM4_RAT
SUCA_MOUSE
TMED5_MOUSE
MAP12_MOUSE
AGRG1_MOUSE
VAMP2_MOUSE;VAMP2_RAT
KAP2_MOUSE
BAG6_RAT
CSKP_MOUSE
MCF2L_MOUSE
IDHP_MOUSE
PRR7_MOUSE
ARGL1_MOUSE;ARGL1_RAT
LAMP2_MOUSE
PICAL_MOUSE
VCAM1_MOUSE
CADH8_MOUSE
KCC1B_MOUSE
TBCK_MOUSE
PAXB1_MOUSE
NISCH_RAT
STRN3_MOUSE
MAP1B_MOUSE
MOCS3_MOUSE
PLXA3_RAT
TEX35_MOUSE
PISD_MOUSE
PYGM_MOUSE;PYGL_RAT
PDE1A_MOUSE
HNRPU_MOUSE;HNRPU_RAT
RMD5A_MOUSE
CB39L_MOUSE
COG2_MOUSE
SEM4F_MOUSE
AMPB_MOUSE;AMPB_RAT
H14_MOUSE
NBR1_MOUSE
ARAF_MOUSE
PLHD1_MOUSE
PPTC7_MOUSE
CNTN6_MOUSE
MAP7_MOUSE
LONM_MOUSE
AL7A1_MOUSE
SCYL2_MOUSE
LRC47_MOUSE
TRIM2_MOUSE
SUGP2_MOUSE
VP33A_MOUSE
MICA2_RAT
BAG4_MOUSE
GSTK1_MOUSE
SYPH_MOUSE;SYPH_RAT
MVP_MOUSE
ASTN2_MOUSE
IPYR2_MOUSE
ATPA_MOUSE
WDR59_MOUSE
TPRGL_MOUSE
PPR29_MOUSE
TIRR_MOUSE
DDX42_MOUSE
ITIH3_RAT
TM130_MOUSE
ULK3_MOUSE
SDHL_MOUSE
RRAGA_MOUSE
PTPRG_MOUSE
F91A1_MOUSE
RADIL_MOUSE
BAIP2_MOUSE
LDHA_MOUSE;LDHC_RAT
DP13B_MOUSE
TTL12_MOUSE
EZRI_MOUSE;CROCC_MOUSE
VAMP3_MOUSE
UEVLD_MOUSE
KAD5_MOUSE
DDX17_MOUSE
CD2AP_MOUSE
VAT1L_MOUSE
LEO1_MOUSE
SLK_RAT;STK10_RAT
AL9A1_MOUSE
SERC1_RAT
WWP1_MOUSE
THUM3_MOUSE
CAD20_MOUSE
H11_MOUSE
AT8A1_MOUSE
MGRN1_MOUSE
COPG1_MOUSE
DPP3_MOUSE
CAB39_MOUSE
ASPH2_MOUSE
UCKL1_MOUSE
PSMD8_MOUSE
CNTLN_MOUSE
ARLY_MOUSE
NEMF_MOUSE
SUV3_MOUSE
GSTP1_MOUSE
CADM2_MOUSE
CTND1_MOUSE
SFXN1_RAT
ATGA1_MOUSE
INP4A_MOUSE
UBP10_MOUSE
TMEM9_MOUSE
TMX3_MOUSE
SEPT7_MOUSE;SEP10_MOUSE;SEPT7_RAT
PRKRA_MOUSE
SSRP1_MOUSE
LS14A_MOUSE
LPPRC_MOUSE
APOE_MOUSE
HS74L_MOUSE
PRPS1_MOUSE
MYPT2_MOUSE
GANAB_MOUSE
SMCA4_MOUSE
DHRS4_MOUSE
EXOC5_MOUSE
GGPPS_MOUSE
RGS3_MOUSE
EGLN1_MOUSE
LZTL1_MOUSE
MOB2_MOUSE
2A5E_MOUSE
VPS25_MOUSE
C560_MOUSE
PP16A_MOUSE
MOG_MOUSE
KPB2_MOUSE
EPHA4_MOUSE;EPHA3_MOUSE;EPHA5_MOUSE;EPHA6_MOUSE
ACOT5_MOUSE;ACOT3_MOUSE
ATPB_MOUSE
RUVB2_MOUSE
ARL10_MOUSE
DAAM1_MOUSE
OGFD1_MOUSE
ZRAB2_MOUSE
GCP3_MOUSE
CR021_RAT
SNW1_MOUSE
GRID1_MOUSE
LARP7_MOUSE
PI3R4_MOUSE
LACB2_MOUSE
CC50A_RAT
CTU2_MOUSE
CTNB1_MOUSE;CTNB1_RAT
STRP1_MOUSE
CATB_MOUSE
SLIK3_MOUSE
PPR1A_MOUSE
ODPA_MOUSE;ODPA_RAT
MIGA2_MOUSE
PDIP2_MOUSE
S23IP_MOUSE
LRCH1_MOUSE
LRC57_MOUSE
SNX25_MOUSE
BIEA_MOUSE
RPE_MOUSE
RGRF2_MOUSE
KBRS2_MOUSE
IDI1_MOUSE
VIP2_MOUSE
DTNB_MOUSE
NACC2_MOUSE
TWF2_MOUSE
LDHA_RAT
PTN23_RAT
PXL2A_MOUSE
RCAN3_MOUSE
CLIC6_MOUSE
HS12B_MOUSE
RETR2_MOUSE
PA24A_MOUSE
HACE1_MOUSE
MINY2_MOUSE
GRAP1_RAT
ACLY_MOUSE
TM41B_RAT
DHR13_MOUSE
NUMA1_MOUSE
B9D1_MOUSE
PHAR3_MOUSE
RHG07_MOUSE
WDR44_MOUSE
CSTN1_MOUSE
SYK_MOUSE
CUL7_RAT
OTU7A_MOUSE
EIF1A_MOUSE
MIRO1_MOUSE;MIRO2_RAT
SKT_MOUSE
EPHB6_MOUSE
TPM1_MOUSE
FLOT1_MOUSE;FLOT1_RAT
PTPRA_MOUSE
K22O_MOUSE
OSBL6_MOUSE
SFPQ_MOUSE
PPM1F_MOUSE
PLEC_MOUSE
KIFA3_MOUSE
IGF2_MOUSE
UGPA_MOUSE
HEXA_MOUSE
CSN7B_MOUSE
DCLK1_MOUSE
FRS3_MOUSE
SYNJ1_RAT;SYNJ1_MOUSE;SYNJ2_RAT
RUN3B_MOUSE
GMPPB_MOUSE
INT3_MOUSE
HMGB3_MOUSE
CBS_MOUSE
RB39A_MOUSE
FGOP2_MOUSE
KBP_MOUSE
BRD3_MOUSE
KSR1_MOUSE
NU155_MOUSE;NU155_RAT
RNZ2_MOUSE
COPZ1_MOUSE
UBP4_MOUSE
HNRPF_MOUSE
TPRN_MOUSE
PDPK1_MOUSE
RBM5_MOUSE
1433B_MOUSE;1433B_RAT
TPP2_MOUSE
TNR21_MOUSE
COBL1_MOUSE
SERB_MOUSE
AT2B4_MOUSE
L2HDH_MOUSE
AKAP2_MOUSE
VIP1_RAT;VIP1_MOUSE
PARP1_MOUSE
SCAM1_MOUSE
KC1G2_MOUSE
ARHL2_MOUSE
MYO1D_MOUSE;MYO1D_RAT;MYO1G_MOUSE
AAK1_MOUSE
ARHGP_MOUSE
UBP25_MOUSE
JAK1_MOUSE
SYIM_MOUSE
ITA3_MOUSE
AP180_RAT;PICAL_RAT
FKB11_MOUSE
VAT1_MOUSE
TM230_MOUSE
EIPR1_MOUSE
DYL1_RAT;DYL2_RAT
RAB1B_MOUSE;RAB1B_RAT
NTPCR_MOUSE
C1TC_MOUSE;C1TC_RAT
RAB5A_MOUSE
TICN2_MOUSE
AL1L1_MOUSE;AL1L1_RAT
CLU_MOUSE
C43BP_MOUSE
CAND1_MOUSE;CAND1_RAT
SYAM_MOUSE
DC1L2_MOUSE;DC1L2_RAT;RHBL4_MOUSE
RTN4_RAT;RTN4_MOUSE
CLDN1_MOUSE
GCH1_MOUSE
WDR35_RAT
CAH3_MOUSE
IPO8_MOUSE
CREL1_MOUSE;CREL1_RAT
SLIK2_MOUSE
SC5A3_MOUSE
RNT2A_MOUSE
AP2A1_MOUSE
CNPY3_MOUSE
UCRI_RAT
APBA2_MOUSE
TRI26_MOUSE
RGMA_MOUSE
IGBP1_MOUSE
PGP_MOUSE
TM1L2_MOUSE
CEGT_RAT
VP37A_MOUSE
STRN_MOUSE
CYBC1_RAT;CYBC1_MOUSE
RDH11_MOUSE
NRBF2_MOUSE
ABI2_MOUSE
PPR3F_MOUSE
OSB10_MOUSE
SPRTN_MOUSE
MUP_RAT
ATP5I_RAT
SARM1_MOUSE
IF2M_MOUSE
NXN_MOUSE
PALD_MOUSE
NOMO1_MOUSE
MPPD2_MOUSE
NONO_MOUSE
NSF_MOUSE
MTREX_MOUSE
IF2A_MOUSE;IF2A_RAT
CA2D3_MOUSE
SIK3_MOUSE
NLGN2_MOUSE;NLGN4_MOUSE;NLGN1_RAT
PKHF1_MOUSE
PTPRC_RAT
SIN3A_MOUSE
CAND2_MOUSE
MATR3_MOUSE;MATR3_RAT
ALG5_MOUSE
GAN_MOUSE
PLCH2_MOUSE
TMOD2_MOUSE
SEM7A_MOUSE
EDC4_RAT;EDC4_MOUSE
MTA1_MOUSE
TRIM9_MOUSE
AGAP1_MOUSE
S22A1_MOUSE
GMPPA_MOUSE
COMD7_MOUSE
NLGN1_MOUSE
NEK6_MOUSE
EXOC4_MOUSE
GLYG_MOUSE
FAK1_MOUSE;DHB5_MOUSE
ARC1B_MOUSE;ARC1B_RAT
NTCP4_RAT
CNTN1_MOUSE
HMGC2_MOUSE
STRN4_MOUSE
MAF1_MOUSE
PCLO_RAT
DNER_MOUSE
UBP19_RAT
MFF_MOUSE
P85B_MOUSE
IPO9_MOUSE
MDGA2_MOUSE
GCYA1_RAT
SYN2_MOUSE;SYN2_RAT
CDC16_MOUSE
PHYIP_MOUSE
HECW2_MOUSE
2AAB_MOUSE
CYFP2_MOUSE
ABRX2_MOUSE
XPOT_MOUSE
UBP13_MOUSE
RUFY1_MOUSE
PP4P1_MOUSE
NUD15_MOUSE
GHC1_MOUSE
DMD_RAT
PIPNB_MOUSE
SPS2L_MOUSE
PAOX_MOUSE
FADS2_RAT
APEH_MOUSE
RIMKA_MOUSE
RYBP_MOUSE
HD_RAT
RAB5C_MOUSE
AT2B3_RAT
RMD3_MOUSE
GLPC_MOUSE
TBCD_MOUSE;FNDC8_MOUSE
ACSA_MOUSE
EXOC7_MOUSE
ODF3B_MOUSE
CPEB2_MOUSE;CPEB4_MOUSE
B3A2_RAT
SART3_MOUSE
MLF2_MOUSE
CADH6_MOUSE
RB15B_MOUSE
F131B_MOUSE
OSBL8_MOUSE
ASTN1_MOUSE
TPGS2_MOUSE
PODXL_MOUSE
ANFY1_MOUSE
PLSI_MOUSE
DCNL1_MOUSE
NDUS3_MOUSE
AP3B2_MOUSE
NUP58_MOUSE
SYN1_MOUSE
CHMP7_MOUSE
BCAS3_MOUSE
MYRIP_MOUSE
PI4KA_RAT
NEK9_MOUSE
AGAP2_MOUSE
BRSK2_MOUSE;BRSK2_RAT;CHK1_MOUSE
IMPA1_RAT
SEH1_MOUSE
ELMO2_MOUSE
NUCL_MOUSE
TM163_RAT
VPS52_RAT
GUAD_MOUSE
RINI_MOUSE
AUXI_MOUSE
GCDH_MOUSE
CIP4_MOUSE
CRAC1_MOUSE
CASP_MOUSE;CUX1_MOUSE
LITAF_MOUSE
PSA_MOUSE
TSC2_RAT
RSU1_MOUSE
HECAM_MOUSE
RS8_MOUSE;RS8_RAT
IPO11_MOUSE
TCRG1_MOUSE
TBC23_MOUSE
NSUN2_MOUSE
CIB1_MOUSE
DSRAD_MOUSE
ANLN_MOUSE
SPP2B_RAT
MPP3_MOUSE
NB5R1_MOUSE
CA043_MOUSE
ASAH1_MOUSE
EXOS8_MOUSE
FUT11_MOUSE
CSN2_MOUSE
SND1_MOUSE;SND1_RAT
CNTN5_MOUSE
STRBP_MOUSE
NQO2_MOUSE
DDX46_MOUSE
ARAP2_MOUSE
RFIP5_MOUSE
CCD93_MOUSE
DNJB1_MOUSE
SDHB_MOUSE;CC020_MOUSE
DPP6_MOUSE
PDS5B_RAT;PDS5B_MOUSE
GNL1_MOUSE
RHG35_RAT
FRIH_MOUSE
MUTA_MOUSE
DDR1_MOUSE
I2BP2_MOUSE
NALD2_MOUSE
ACADM_MOUSE
AP2A2_MOUSE;AP2A2_RAT
KTI12_RAT
PQBP1_MOUSE
NFASC_RAT
PDCL3_MOUSE
NRP1_MOUSE
TBB4A_MOUSE
PLTP_MOUSE
AATM_MOUSE;AATM_RAT
MSI2H_MOUSE
PABP1_MOUSE
CRYAB_MOUSE
IDE_MOUSE
TPM2_MOUSE
PP6R1_MOUSE
EXOSX_MOUSE
NMDE2_MOUSE
GOGA2_MOUSE
PXL2A_RAT
CSEN_MOUSE
P4R3A_MOUSE
NU107_MOUSE
SAHH_MOUSE;SAHH_RAT
TMED9_MOUSE
ELAV3_MOUSE
BIG1_RAT;BIG1_MOUSE
VINC_MOUSE;VINC_RAT
NUBP2_MOUSE
HOGA1_MOUSE
ZN207_MOUSE
FNBP1_MOUSE;LORF1_MOUSE
PGPI_MOUSE
WIPI4_MOUSE
UBAP2_MOUSE
AADAT_MOUSE
PALLD_MOUSE
NUP85_MOUSE
GPC5_MOUSE
MTM1_MOUSE
SYDC_RAT
F177A_MOUSE
KCJ10_RAT;KCJ10_MOUSE
ANXA5_MOUSE
MACD1_MOUSE
PARD3_RAT
ANXA2_MOUSE
CAVN2_MOUSE
ZBT20_MOUSE
HSP74_MOUSE
EFR3A_MOUSE
UB2E3_MOUSE;UB2E1_MOUSE
RENT1_MOUSE;DNA2_MOUSE
SYTC_MOUSE
ODR4_MOUSE
BRWD3_MOUSE
SH3G3_MOUSE
CP100_MOUSE
SPCS3_MOUSE
SC24A_MOUSE
SUGP1_MOUSE
F120A_MOUSE
CCNY_MOUSE
LAR4B_MOUSE
UBE3C_MOUSE
UPP_MOUSE
RLBP1_MOUSE
FAAA_MOUSE
JMY_MOUSE
CAPZB_MOUSE;CAPZB_RAT
LGI4_MOUSE
CGL_MOUSE
ZY11B_MOUSE
MTFP1_MOUSE
SEPT5_MOUSE;SEPT1_MOUSE
PAXI_MOUSE
MYT1_MOUSE
SYMC_MOUSE
LIN7C_MOUSE;RILP_MOUSE
SYVC_MOUSE
ADRM1_MOUSE
PGM5_MOUSE
NB5R2_MOUSE
SPT32_RAT
MVD1_MOUSE
OSTF1_MOUSE
CAD23_RAT
AFAD_RAT;AFAD_MOUSE
OSBL2_MOUSE
HDAC1_MOUSE
MYLK_MOUSE
CADM1_MOUSE
LAT1_MOUSE;YLAT2_MOUSE
STX16_MOUSE
AP4A_MOUSE
UBA3_MOUSE
U5S1_MOUSE
KIF5C_MOUSE;KIF5A_RAT;KIF5C_RAT;PAR14_MOUSE
APEX1_MOUSE
SMAKA_MOUSE
MAP1S_MOUSE;MAP1S_RAT
KCJ16_RAT;KCJ16_MOUSE
LIX1_MOUSE
AGRL2_MOUSE
MESH1_MOUSE
THOP1_MOUSE
SCMC1_MOUSE
UBP7_MOUSE;UBP7_RAT
GSTM6_MOUSE
CAC1C_RAT
MAP4_RAT
GNAQ_MOUSE
GATA_MOUSE
LRC20_MOUSE
VAV2_MOUSE
XPO2_MOUSE
NRCAM_MOUSE
PTN5_MOUSE
MSI1H_MOUSE
SNX18_MOUSE
GYS1_MOUSE;GYS1_RAT
GRB10_MOUSE
CT027_MOUSE
COASY_MOUSE
WDR26_MOUSE
WDR37_MOUSE
RHG22_MOUSE
STXB5_RAT
NEO1_RAT;NEO1_MOUSE
GAK_RAT
GMDS_MOUSE
RBM12_MOUSE
RASM_MOUSE
MB12B_MOUSE
ADRO_MOUSE
4ET_MOUSE
PLPL9_MOUSE;PLPL9_RAT
AKT1_MOUSE
CYLD_MOUSE
NTNG2_MOUSE
MRP1_RAT
NQO1_MOUSE
DMWD_MOUSE
MIA2_MOUSE
RBM15_MOUSE
MCCA_MOUSE
SNTB1_MOUSE
TADBP_MOUSE
K1C18_MOUSE
AIFM3_MOUSE
F171B_MOUSE
BBC3_MOUSE
HEM2_MOUSE
KLH26_MOUSE
DESM_MOUSE
SAP18_MOUSE
ITPK1_MOUSE
ES1_RAT
RGS8_MOUSE
PTEN_MOUSE
PP4R4_MOUSE
DDC_MOUSE
S12A2_MOUSE;S12A1_MOUSE;S12A1_RAT
NU2M_RAT
CAN1_MOUSE
SCAI_MOUSE
SPAST_MOUSE
RGS19_RAT
PRRC1_MOUSE
SAFB1_RAT;SAFB1_MOUSE;SAFB2_MOUSE
LMNA_MOUSE
TAB3_MOUSE
RFT1_MOUSE
TP4A3_MOUSE
CSTF1_MOUSE
CH082_MOUSE
COR1B_MOUSE
SC5A6_RAT
KI21B_RAT;KI21B_MOUSE;KIF27_RAT
DEN1A_MOUSE
NUDC3_MOUSE;UVRAG_MOUSE
IPO13_MOUSE
EIF3C_MOUSE
RRAGB_MOUSE
HS105_MOUSE;HS105_RAT
TGM2_MOUSE
TRIM6_MOUSE
ACTBL_MOUSE
RM44_MOUSE
TOM22_RAT
ATG13_MOUSE
NLGN3_MOUSE;NLGN3_RAT
F219A_MOUSE
KINH_MOUSE;KINH_RAT
RIC8A_MOUSE;RIC8B_MOUSE
PDE1B_RAT
CO3_RAT
VPS28_MOUSE
TPC10_MOUSE
XIRP1_MOUSE
SH2B2_MOUSE
KPBB_MOUSE
MINY1_MOUSE
DDX3X_MOUSE;DDX3L_MOUSE;DDX4_MOUSE
PURA2_MOUSE
GDIR1_MOUSE;GDIR1_RAT
KLC4_MOUSE
CAP2_RAT
RCC2_MOUSE
DCTN6_MOUSE
RBP10_MOUSE
ARF1_MOUSE;ARF1_RAT;ARF2_RAT;ARF4_RAT
ACTB_MOUSE
AN13D_MOUSE;AN13B_MOUSE
UBA5_MOUSE
RNZ1_MOUSE
ARF2_MOUSE
RUFY2_MOUSE
HSDL1_RAT
RS20_MOUSE
SMG9_MOUSE
NUP54_MOUSE
5NT1A_MOUSE;5NT1B_MOUSE
ABHDA_MOUSE
PNMA1_RAT
C1QC_MOUSE
SRRT_MOUSE
FBX7_RAT
R4RL2_MOUSE
CPIN1_MOUSE
ARHG2_MOUSE
DYN3_MOUSE
CBR4_MOUSE
CYFP1_MOUSE
OCRL_MOUSE
PIAS1_MOUSE;PIAS2_MOUSE
CLIP1_MOUSE
S22A4_RAT
NFKB1_MOUSE
SPRL1_MOUSE
ARSB_MOUSE
NTRK3_MOUSE
PYRG1_MOUSE
FCHO2_MOUSE
ANK3_RAT
EAA1_MOUSE;EAA1_RAT;EAA4_MOUSE;EAA4_RAT
SMN_MOUSE
ABHGA_RAT
RN181_MOUSE
NID1_MOUSE
SFXN3_RAT
IPO5_MOUSE
NELFA_MOUSE
PPGB_MOUSE
KCNA6_MOUSE
SAMH1_MOUSE
CHERP_MOUSE
BGAL_MOUSE;GLB1L_MOUSE
WDR48_MOUSE
GSTT2_MOUSE
CC186_MOUSE
AN34B_MOUSE
PSMF1_MOUSE
RT02_MOUSE
CMBL_MOUSE
IQEC3_MOUSE
RM15_MOUSE
SYNC_MOUSE
CDKL5_MOUSE
RISC_MOUSE
OAT_MOUSE
DYN1_MOUSE
SH3K1_MOUSE
PLK3_MOUSE
PCAT1_RAT
SESD1_MOUSE
ACOC_MOUSE
RPF2_MOUSE
PRP6_MOUSE
TBCB_MOUSE
ASHWN_MOUSE
GORAB_MOUSE
EFGM_MOUSE;EFGM_RAT
COR1A_MOUSE
LYSM2_MOUSE
SGMR1_MOUSE
DGKQ_MOUSE
PP1RB_MOUSE
C2C2L_MOUSE
RPB3_MOUSE
PUM2_MOUSE
MA2C1_MOUSE
S20A2_RAT
ANR52_MOUSE
ELP2_RAT
PREB_RAT
RPGF2_RAT;RPGF2_MOUSE
RSMB_MOUSE
HSDL2_MOUSE
UBP2L_MOUSE
CLPX_MOUSE
ABCE1_MOUSE
STK11_MOUSE
STAR7_MOUSE
SYNPR_MOUSE
ASSY_MOUSE
KIF5A_MOUSE
ETFD_MOUSE;ETFD_RAT
KDIS_RAT
FSCN1_MOUSE
KHK_MOUSE
REEP6_MOUSE
RHG32_MOUSE;RHG33_MOUSE
CAC1I_RAT
PRRT2_RAT
FASTK_MOUSE
HOME2_MOUSE
FRMD5_MOUSE
TRI36_MOUSE
SBP1_MOUSE
PAK4_MOUSE
AHI1_MOUSE
RL19_MOUSE;RL19_RAT
PITM3_MOUSE
PGM2_MOUSE
METH_MOUSE
SNP29_MOUSE
AP3M1_MOUSE
MEST_MOUSE
VTA1_MOUSE
UBE3B_MOUSE
ACL6B_MOUSE
EF2_MOUSE;EF2_RAT
CPSF3_MOUSE
PSIP1_MOUSE;PSIP1_RAT
FAK2_MOUSE
PSD1_MOUSE
CY1_MOUSE
PACR_RAT
FAF2_MOUSE;FAF2_RAT
CCD92_MOUSE
GPR37_MOUSE;GPR37_RAT
CL029_MOUSE
TICN1_MOUSE
PI5PA_RAT;PI5PA_MOUSE
RN170_MOUSE
ASGL1_RAT
EI3JA_MOUSE
EXOS1_MOUSE
RM20_MOUSE
PTPRU_MOUSE
CSPG2_RAT;CSPG2_MOUSE
CTL2_RAT
NCAM2_MOUSE;STK31_MOUSE
GATB_MOUSE
AKA12_RAT;AKA12_MOUSE
GSKIP_MOUSE
CAMP1_RAT
ENPP1_MOUSE
GNAZ_MOUSE
THY1_MOUSE
GRK6_MOUSE;GRK4_MOUSE;GRK5_MOUSE
TBC17_MOUSE
MON1B_MOUSE
MCA3_MOUSE
NDRG1_MOUSE
LAP2B_MOUSE
RM47_MOUSE
H10_MOUSE
LEXM_RAT
ADDG_RAT
COMDA_MOUSE
RBM25_MOUSE
RL7_RAT
SEPT6_MOUSE
SC6A8_RAT
EMAL2_RAT
PLCL2_MOUSE
FPRP_MOUSE
G3BP2_MOUSE
FKB15_MOUSE
DUSTY_MOUSE
DOCK8_MOUSE
NUDC1_MOUSE
CHM2A_MOUSE
DIRA2_MOUSE
CSK_MOUSE
GSTM5_MOUSE
TXD15_MOUSE
ANS1B_RAT
HNRPM_MOUSE;PLVAP_MOUSE
ZNT3_RAT;ZNT3_MOUSE
NSG2_MOUSE
HDGR2_MOUSE
PSMG1_MOUSE
VWF_RAT
CNN3_MOUSE;CNN2_MOUSE
LARP1_MOUSE
TOP2A_RAT
ATCAY_RAT
PTGDS_MOUSE
HIPL2_MOUSE
MTNA_MOUSE
STAU2_MOUSE
AOC3_MOUSE
RT18B_MOUSE
NMDZ1_RAT;NMDZ1_MOUSE
RIMS2_MOUSE
STEA3_RAT
LGI1_RAT
RS7_MOUSE
MYO3A_MOUSE
EI24_RAT
REPS1_MOUSE
ARL8B_MOUSE;ARL8B_RAT
CARF_MOUSE
ICAM5_MOUSE
INMT_MOUSE
SBNO1_RAT
STRP2_MOUSE
YIPF3_RAT
FRIL1_RAT;RIPR2_RAT
RALY_MOUSE
AT2B1_RAT;AT2B1_MOUSE
DRG1_MOUSE
GPX1_MOUSE
LONP2_MOUSE
ODPX_MOUSE
SYT13_MOUSE
UCRI_MOUSE
ERI3_MOUSE
GRM2_RAT
CC117_RAT
RL14_MOUSE;RL14_RAT
NUP88_MOUSE
AVEN_MOUSE
TRIM3_MOUSE
ETFB_MOUSE;ETFB_RAT
VIME_MOUSE;KRT87_MOUSE
PPIE_MOUSE
PCD16_RAT
SMCA5_MOUSE;SMCA1_MOUSE
[truncated: 1,399 more rows]

## Sheet: Additional Table 2
Male Highest
Highlighted= statistically significant
Accession
CCDB1_MOUSE
DEN4B_MOUSE
ELP3_MOUSE
GDPP1_MOUSE
MTX2_MOUSE
K0930_MOUSE
MCCB_MOUSE
ALBU_MOUSE
JIP3_MOUSE
MTPN_MOUSE
RIR1_MOUSE
BAG6_MOUSE
SMAG2_MOUSE
TALDO_MOUSE;TALDO_RAT
RPAC1_MOUSE
IMA7_MOUSE
PAK2_MOUSE
EPMIP_MOUSE
MINK1_MOUSE
WRIP1_MOUSE
NDUA5_MOUSE
DOCK1_MOUSE
PDCD6_MOUSE
SYWM_MOUSE
NET3_MOUSE
FETA_RAT
NEUG_MOUSE
DPYL4_MOUSE
SCOT1_MOUSE
SIKE1_MOUSE
SYFB_MOUSE
KIF3A_MOUSE;KI16B_MOUSE;KIF4_MOUSE
SYRC_MOUSE
CNTN6_RAT
FIS1_MOUSE
NDKB_MOUSE
GLPK_MOUSE;GLPK2_MOUSE
MTAP2_MOUSE
SCG3_MOUSE
EF1G_MOUSE
VAC14_MOUSE
UB2V1_MOUSE
CUL1_MOUSE
RANB9_MOUSE
MRP_MOUSE
SYT2_MOUSE;SYT2_RAT
FA98A_MOUSE
CFA36_MOUSE
RED1_MOUSE
PPP5_MOUSE
BACE1_MOUSE
GOGA5_MOUSE
IMA3_MOUSE
NRBP_MOUSE
NSF1C_MOUSE
RRAS2_MOUSE
UBC9_MOUSE
2A5B_MOUSE
ESRP1_MOUSE
NUP93_MOUSE
HMCS1_MOUSE
HEM4_MOUSE
BUD31_MOUSE
RIPL1_MOUSE
T22D4_MOUSE
KGP2_MOUSE
MSTO1_MOUSE
ERGI2_MOUSE
BMPR2_MOUSE
MBNL1_MOUSE
HS90A_MOUSE;TRAP1_RAT
DJB11_MOUSE
MYO19_MOUSE
PTN23_MOUSE
ACAD9_MOUSE
VISL1_MOUSE
LMNB1_MOUSE
GFAP_RAT
SYVC_RAT
SYNM_MOUSE
RLA2_MOUSE
CA050_MOUSE
ANK1_MOUSE
DJC10_MOUSE
MYORG_MOUSE
PSMD9_MOUSE
RAC3_MOUSE
LIPA4_RAT
CLD11_RAT;CLD11_MOUSE
MOBP_MOUSE;MOBP_RAT
BORC6_MOUSE
NAMPT_MOUSE
CSDC2_MOUSE
MET22_MOUSE
PFD5_MOUSE
RAP1A_MOUSE
DYR_MOUSE
RT22_MOUSE
TT39C_MOUSE
CAP1_MOUSE;CAP1_RAT
PPM1H_MOUSE;PPM1J_MOUSE;PPM1M_MOUSE
VP13A_MOUSE
CR025_MOUSE
K1C42_RAT
PREX1_MOUSE
ECM29_MOUSE
HUWE1_MOUSE
PRS4_MOUSE
CPNE6_MOUSE;CPNE7_RAT
LC7L3_MOUSE
SYCM_MOUSE
RM43_MOUSE
NPTXR_MOUSE
CETN2_MOUSE;CETN1_MOUSE;CETN4_MOUSE
TM199_MOUSE
ACAP2_MOUSE
NECA1_MOUSE
AUP1_MOUSE
GAPD1_MOUSE
NDUS4_MOUSE
NDUB3_MOUSE
RHG35_MOUSE
RL36_MOUSE
SNF8_MOUSE
LMAN1_MOUSE
MARK3_MOUSE
HNRPQ_MOUSE
SUMO1_MOUSE
CA2D1_RAT
UBL4A_MOUSE
PTPRS_RAT
MSMO1_RAT
GL1D1_MOUSE
PI3R4_RAT
DEN5A_RAT
DNJA1_MOUSE
UB2L3_MOUSE;ZC3H6_MOUSE
P4HTM_MOUSE
K1549_MOUSE
GPDM_MOUSE
AMPN_RAT
ACYP1_MOUSE
SGTA_MOUSE
CYTC_MOUSE
IF4A3_MOUSE
LAMA3_MOUSE
NELFE_MOUSE
NHRF2_MOUSE
IF4G3_MOUSE
CNOT2_MOUSE
CCD47_MOUSE
RL35_MOUSE
BECN1_MOUSE
SE1L1_MOUSE
MSRB2_MOUSE
YBOX3_MOUSE
AGK_MOUSE
GLSL_MOUSE
NDKA_MOUSE
SDHA_MOUSE
RN114_MOUSE
PFD2_MOUSE
UCHL3_MOUSE;UCHL4_MOUSE
HNRPK_MOUSE
LCAP_RAT
CDC23_MOUSE
CYC_MOUSE;CYC2_MOUSE;CYC_RAT
XYLK_MOUSE
COX5A_MOUSE;COX5A_RAT
FBX42_MOUSE
ATP5L_MOUSE
REEP2_MOUSE
HEPH_RAT
STMN1_MOUSE
SNAPN_MOUSE
DOPD_MOUSE
ATLA3_MOUSE
NRDC_RAT
RL31_MOUSE
WNK1_MOUSE;WNK4_MOUSE;WNK3_MOUSE
UB2V2_MOUSE
A16A1_MOUSE
ELP1_RAT
RAD50_RAT
NOP16_MOUSE
CAMP1_MOUSE
WIPF3_MOUSE
RGRF1_RAT
PTBP2_MOUSE
PRPF3_MOUSE
CORO6_MOUSE
SRGP2_RAT
RAP1B_MOUSE
CXA1_MOUSE
NDUS2_MOUSE
CCD22_MOUSE
ADAS_MOUSE
VPS52_MOUSE
UBC12_MOUSE
KHDR1_MOUSE;KHDR2_MOUSE
CGT_MOUSE
HYOU1_RAT
NRBP2_MOUSE
CHM4B_MOUSE;CHM4C_MOUSE
TCPH_MOUSE
PRDX1_MOUSE;PRDX1_RAT;PRDX4_RAT
GBRL2_MOUSE
P53_MOUSE
TPP2_RAT
ATAD3_MOUSE
RN123_RAT
LC7L2_MOUSE
LMBD1_MOUSE
CATA_MOUSE
RER1_RAT
CBPM_MOUSE
PRDX6_MOUSE
AGAP2_RAT
MBP_MOUSE
DI3L2_MOUSE
CPLX1_MOUSE
CC136_MOUSE
CNTN4_RAT
GTF2I_RAT
HSP13_MOUSE
NUDC2_MOUSE
ACSF3_MOUSE;KNTC1_MOUSE
GALC_MOUSE
CMGA_MOUSE
CALM1_MOUSE;CALL3_MOUSE;TNNC2_MOUSE
SYMM_MOUSE
GLCM_MOUSE
AT2L2_MOUSE
PDIA3_MOUSE
LRRF1_MOUSE
NP1L1_MOUSE
RS15A_MOUSE
AMPD3_MOUSE;AMPD1_MOUSE
SYLM_MOUSE
NDUA7_MOUSE
NENF_MOUSE
PTPRA_RAT
PIGS_MOUSE
COX42_MOUSE
BRNP1_MOUSE
SYGP1_RAT
NHRF1_MOUSE
RAGP1_MOUSE
TCP4_MOUSE
PRVA_MOUSE
IMA5_MOUSE
APLP1_MOUSE
MORC4_MOUSE
YES_MOUSE;HCK_MOUSE
CAN2_MOUSE
DPOLB_MOUSE
NDUC2_MOUSE
CACB4_MOUSE
TIMP2_MOUSE
ARHG9_MOUSE;ARHG4_MOUSE;SPT13_MOUSE
ITBP1_MOUSE
TNIK_MOUSE
DYR1A_MOUSE
TBC24_MOUSE
TCPZ_MOUSE;TCPW_MOUSE
GARS_MOUSE
AP3S1_MOUSE
RB11B_MOUSE;RAB25_MOUSE
KAZRN_MOUSE
THIC_MOUSE
RS30_MOUSE
ARPC3_MOUSE
ACD11_MOUSE
TTC7B_MOUSE
CEBPE_MOUSE
GSTT3_MOUSE
NP1L4_MOUSE
RABE2_MOUSE
IF4G1_MOUSE
PLXB3_RAT
GSLG1_RAT
K2C5_RAT;K2C75_RAT
ISCU_MOUSE
UB2G2_MOUSE
HS71L_MOUSE
SC31A_RAT
BZW2_MOUSE
MSS4_MOUSE
COMD8_MOUSE
MYL6B_MOUSE
AKD1B_MOUSE
SNTA1_MOUSE
H2B3B_MOUSE;H2B2E_MOUSE;H2B3A_MOUSE
ACON_MOUSE
BABA1_MOUSE
ERO1A_MOUSE;ERO1B_MOUSE
KT222_MOUSE
CLCB_MOUSE
SRC_MOUSE
HPCL1_MOUSE
ATRX_MOUSE
BBS1_MOUSE
PTPRF_RAT
PLCG1_RAT
ARMC6_MOUSE
NPS3B_MOUSE
VATF_MOUSE
PXK_MOUSE
ABCB9_RAT;ABCB9_MOUSE;FIBB_RAT
TSN2_RAT
NCALD_MOUSE
CSN8_MOUSE
MARCS_MOUSE
DIC_MOUSE
PTPRE_MOUSE
K2C1_RAT
HPCA_MOUSE
SRPRA_MOUSE
JUPI1_MOUSE
OXSR1_MOUSE
MRVI1_MOUSE
CBPD_RAT
ADK_MOUSE
DCE2_MOUSE;DCE2_RAT
GLNA_MOUSE;GLNA_RAT
KCIP4_MOUSE
GPCP1_MOUSE
RAP2C_MOUSE
PA2G4_MOUSE
ANXA6_MOUSE
NFM_RAT
ABHDB_MOUSE
MTMR5_MOUSE
DCTN2_MOUSE
PEX19_MOUSE
KDM2B_MOUSE
RS9_MOUSE
NBEA_MOUSE
NDUAD_MOUSE
NUCB1_MOUSE
CSKI1_MOUSE
IQEC3_RAT
MGDP1_MOUSE
MAOM_MOUSE
DNAL1_MOUSE
PPIL3_MOUSE
PROF1_MOUSE;PROF1_RAT
FDFT_MOUSE
RS12_MOUSE
NEGR1_MOUSE
TRXR1_MOUSE;TRXR1_RAT
CAPS1_RAT
PPIL1_MOUSE
SRCN1_RAT
COPG2_MOUSE
NRCAM_RAT
SCG2_MOUSE
NTRI_MOUSE
GPN1_MOUSE
LRRF2_MOUSE
HMBX1_MOUSE
SC6A5_RAT;SC6A5_MOUSE
GNA13_MOUSE
SAM14_MOUSE
RAB9A_MOUSE
NAA50_MOUSE
CHP1_MOUSE
RL35A_MOUSE
AQP4_RAT
NDUAC_MOUSE
NCS1_MOUSE
PPIF_MOUSE
VATG2_MOUSE
CUTA_MOUSE
HOOK3_MOUSE
MANBA_MOUSE
RPAB3_MOUSE
NICA_MOUSE
K1C42_MOUSE
CRBN_MOUSE
NMT1_MOUSE
BTBDB_MOUSE
LSAMP_MOUSE
OS9_MOUSE
ENPP6_MOUSE
SHIP2_RAT
INTU_RAT
AES_MOUSE
RS13_MOUSE
ITIH3_MOUSE
NUDC_MOUSE
NCLN_MOUSE
CPNE5_MOUSE;CPNE8_MOUSE
HYPK_MOUSE
WDR44_RAT
E41LA_MOUSE
STA5B_MOUSE;STA5A_MOUSE
SRP68_MOUSE
DNJC3_MOUSE
HSP7C_MOUSE;HSP7C_RAT;HSP72_RAT;HS71A_RAT;HS71L_RAT
RIMS4_MOUSE
ITB8_MOUSE
TBC13_MOUSE
NOVA1_MOUSE
CS025_MOUSE
ATLA2_MOUSE
DDA1_MOUSE
RS14_MOUSE
PROF2_MOUSE;PROF2_RAT
GBG3_MOUSE
SCRIB_MOUSE
DDX3Y_MOUSE
RT28_MOUSE
RL22L_MOUSE
CMC2_MOUSE
CALR_MOUSE
ILDR2_MOUSE
PGCB_MOUSE
CO040_MOUSE
LSM3_MOUSE
SMAP2_MOUSE
MPP7_MOUSE
TTC9C_MOUSE
PSMD4_MOUSE
RB11A_MOUSE
UNK_MOUSE
SPS1_MOUSE
FCL_MOUSE
DLGP4_RAT
BRNP3_MOUSE
LRC8B_MOUSE
EIF3D_MOUSE
CEND_MOUSE
GBRAP_MOUSE
K1551_MOUSE
PTCD1_MOUSE
CETN3_MOUSE
VCIP1_RAT
F107B_MOUSE
KIF3B_MOUSE;KIF14_MOUSE
ELOB_MOUSE
AT1B2_MOUSE
DCTN1_RAT
DHCR7_RAT
PPIA_MOUSE;PPIA_RAT
GFRA2_MOUSE
THIO_MOUSE
GPAM1_MOUSE
STIP1_MOUSE
VRTN_MOUSE
RPGF3_MOUSE
PNPO_MOUSE
ADCY3_RAT
UBQL2_MOUSE
CUL2_MOUSE
RCN2_MOUSE;HLTF_MOUSE
TPD53_MOUSE
AIFM1_MOUSE;AIFM1_RAT
BAP18_MOUSE
RM24_MOUSE
KS6A5_MOUSE
FABP7_MOUSE
LSM1_MOUSE
SMD1_MOUSE
SAP_MOUSE
NUP62_MOUSE
H2B1B_MOUSE
H2B2B_MOUSE
H2B1C_MOUSE;H2B1H_MOUSE;H2B1M_MOUSE;H2B1A_MOUSE
KCTD4_MOUSE
COMD2_MOUSE
PPM1G_MOUSE
SCMC3_MOUSE
RS19_MOUSE
EXOG_MOUSE
CMKMT_MOUSE
SODC_MOUSE
SHLB2_MOUSE
CD5R1_MOUSE
HINT1_MOUSE
TRM44_MOUSE
CC126_MOUSE
EDF1_MOUSE
PDZ11_MOUSE
ITPR2_RAT
CISD1_MOUSE
DEGS1_RAT
PCSK1_MOUSE
CING_MOUSE
CNR1_RAT
API5_MOUSE
BICD1_MOUSE
CAMP3_MOUSE
PGCA_RAT
RL22_MOUSE
AKTS1_MOUSE
AP180_MOUSE
DPYL3_MOUSE;DPYL3_RAT
COX3_RAT
KBRS1_MOUSE
PODXL_RAT
NACAD_MOUSE
SYUA_MOUSE
CSPG4_RAT
PEA15_MOUSE
COMD1_MOUSE
TTL_MOUSE
AKA7A_MOUSE
DBNL_MOUSE
CD166_MOUSE
OPTN_MOUSE
LGUL_MOUSE
CP51A_MOUSE
IMPA2_MOUSE
CUL4B_MOUSE
CNTN3_RAT
NDUS5_MOUSE
GPKOW_MOUSE
KCC2G_MOUSE;KCC2G_RAT
H4_MOUSE;H4_RAT
FKBP2_MOUSE
HP1B3_MOUSE
NDUB4_MOUSE
PLCB1_RAT
AGFG1_MOUSE
EMC7_MOUSE
RM12_MOUSE
NECA2_MOUSE
FABP5_MOUSE
RM49_MOUSE
ARHGC_MOUSE
LEGL_MOUSE
KLC1_MOUSE
SYWC_MOUSE
NS1BP_MOUSE
ARL2_MOUSE
NDUB6_MOUSE
XRCC6_MOUSE
ATRN_RAT
H33_MOUSE;H3C_MOUSE;H31_RAT
CPTP_MOUSE
STRAP_MOUSE
CE170_MOUSE
VATA_MOUSE
PCLO_MOUSE
PITM1_RAT;PITM1_MOUSE
H31_MOUSE
CACP_MOUSE
HCN4_RAT
SLIT1_RAT
DHX15_MOUSE
PEX14_MOUSE
PHLD_MOUSE
TSYL2_MOUSE
SP130_MOUSE
AMD_MOUSE
NFU1_MOUSE
PLCB4_RAT
S12A5_RAT;S12A6_MOUSE;S12A4_MOUSE;S12A7_MOUSE;S12A7_RAT
LPPRC_RAT
ANR39_MOUSE
CIA2B_MOUSE
ATP5S_MOUSE
HNRH2_MOUSE
PAK3_MOUSE
RM23_MOUSE
KXDL1_MOUSE
HEM6_MOUSE
ITA1_RAT
CANB1_MOUSE
GAPR1_MOUSE
K1107_RAT
TRAF3_MOUSE
K2C73_RAT
BIN2_MOUSE
DYN3_RAT
ASAP1_RAT
UBR4_RAT
IKIP_MOUSE
LYAG_MOUSE
COTL1_MOUSE;COTL1_RAT
MYDGF_MOUSE
ADNP_RAT
MYO9B_MOUSE
STMN2_MOUSE
PLPR4_MOUSE
SYEM_MOUSE
CCD50_MOUSE
SPHK2_MOUSE
CALB1_MOUSE
GNAS1_MOUSE
PUR9_MOUSE
VGLU2_RAT;VGLU2_MOUSE;NPT1_MOUSE;NPT1_RAT
NXP20_MOUSE
PLCD_RAT
COX41_MOUSE
ERF3A_MOUSE
GMFB_MOUSE;GMFG_MOUSE
PCKGM_MOUSE
EVI5_MOUSE
ATPD_MOUSE
RS26_MOUSE
NDUS7_MOUSE
CAH8_MOUSE
HSP72_MOUSE
HMGN1_MOUSE
HTR5B_MOUSE
TAGL2_MOUSE
PCP_MOUSE
LIPA3_RAT
UBE2N_MOUSE
NPC2_MOUSE
PRP4_MOUSE
CYB5_MOUSE
TBC9B_MOUSE
TRI56_MOUSE
DNM1L_RAT
TBCA_MOUSE
PDXD1_MOUSE
LGI2_MOUSE
FA50A_MOUSE
CX6B1_MOUSE
PSN1_MOUSE
LZIC_MOUSE
T10B_MOUSE
PIN1_MOUSE
SC11C_MOUSE
ARP3_MOUSE
FKB1B_MOUSE
PLRKT_MOUSE
GSTA4_MOUSE
RL27_MOUSE;RL27_RAT
NADE_MOUSE
HINT2_MOUSE
MADD_MOUSE
MEA1_MOUSE
TR150_RAT
KCY_MOUSE
TFR1_MOUSE
MID51_MOUSE
WDR91_MOUSE
PCBP2_MOUSE
DHX34_MOUSE
RL10_MOUSE;RL10L_MOUSE
CDC37_MOUSE
NID2_RAT;NID2_MOUSE
CSTN3_MOUSE
UBQL1_MOUSE
MYL6_MOUSE
UB2G1_MOUSE
I5P2_MOUSE
4F2_RAT
CLPP_MOUSE
T132A_RAT
SCO2_MOUSE
SYJ2B_MOUSE
MESD_MOUSE
TMOD3_MOUSE
MAON_MOUSE
SMD2_MOUSE
SCFD1_MOUSE
PURB_MOUSE
HPCL4_MOUSE
L1CAM_RAT
GLU2B_MOUSE
RS17_MOUSE
SOGA3_MOUSE;MTCL1_MOUSE;SOGA1_MOUSE
ARP5L_MOUSE
MIF_MOUSE
RL30_MOUSE
RPN1_MOUSE
PEBP1_MOUSE;PEBP2_MOUSE
CLUS_MOUSE
BASI_MOUSE
SELO_MOUSE
CKLF5_MOUSE
IPKA_MOUSE
COX6C_MOUSE
ZN771_MOUSE
ENPP5_MOUSE
AGRL3_RAT
PAIRB_MOUSE
BORC5_MOUSE
SERA_MOUSE
MAP6_RAT
GGT7_RAT
ACS2L_MOUSE
PDE6D_MOUSE
NASP_MOUSE;NASP_RAT
TXD12_MOUSE
GP101_MOUSE
BRAP_MOUSE
KPCE_MOUSE
H2AV_MOUSE
TBL1R_MOUSE
ARPC4_MOUSE
CCD58_MOUSE
DREB_RAT
DLG2_RAT
NICN1_MOUSE
K22E_RAT;K2C4_RAT
TEX10_MOUSE
SHPK_MOUSE
OCAD2_MOUSE
WNK2_MOUSE
NDUA6_MOUSE
JIP4_MOUSE
EHD4_MOUSE
SEPT3_MOUSE
OXDA_MOUSE
VANG2_MOUSE
CNOT9_MOUSE
SZRD1_MOUSE
CNTN2_RAT
NDUS8_MOUSE
PDCD5_MOUSE
SYCC_MOUSE
VAMP1_RAT
GLRX3_MOUSE
POC5_MOUSE
CCD91_MOUSE
VATB2_MOUSE;VATB2_RAT
TOM20_MOUSE
VIGLN_RAT
PURG_MOUSE
GLYM_MOUSE;GLYC_MOUSE
ISCA1_MOUSE
RRFM_MOUSE
TBAL3_MOUSE
PPCEL_MOUSE
UB2D3_MOUSE;U2D2B_MOUSE
TCPA_MOUSE
BUB3_MOUSE
TPGS1_MOUSE
RANG_MOUSE
NAC3_RAT
PYRD_MOUSE
PRDX5_MOUSE
CH10_MOUSE
QCR8_MOUSE
NCF2_MOUSE
SNX4_MOUSE
AT2B2_RAT
CRK_MOUSE
HNRH1_MOUSE
FM1AA_MOUSE
LZTS2_MOUSE
F241B_MOUSE
RBBP4_MOUSE
PROD_MOUSE
RD23B_MOUSE
AMZ2_MOUSE
TIGAR_MOUSE
NEUR4_MOUSE
K2C6A_RAT
HPLN4_MOUSE
RFOX2_MOUSE
RFOX1_MOUSE;RFOX3_MOUSE
H2A2A_MOUSE
ITB5_MOUSE
DMXL2_MOUSE
H2AJ_MOUSE;H2A1B_MOUSE
RGS6_MOUSE
FAM3C_MOUSE
SPF27_MOUSE
B3GA3_MOUSE
ACES_MOUSE;ACES_RAT
MATN1_MOUSE
ZYX_MOUSE
BCAS1_MOUSE
NDRG2_MOUSE
IPO7_MOUSE
HIBCH_MOUSE
FUBP2_MOUSE
MAP1A_MOUSE
FPPS_MOUSE
S4A5_RAT
UB2FA_MOUSE
RAB31_MOUSE
SYYC_MOUSE
MYO16_MOUSE
RT18A_MOUSE
CAF17_MOUSE
COX20_MOUSE
LSM8_MOUSE
GIPC1_MOUSE;GIPC3_MOUSE
SHAN1_RAT;SHAN1_MOUSE
PPM1E_MOUSE;PPM1E_RAT
TNPO1_MOUSE
SNX10_MOUSE
CBPE_MOUSE
SELT_MOUSE
NDUB5_MOUSE
SPTN1_RAT;SPTA1_MOUSE
RRF2M_MOUSE
PCNP_MOUSE
IRF3_MOUSE
YBOX1_MOUSE;YBOX2_MOUSE
PLLP_MOUSE
PRD16_MOUSE
UBQL4_MOUSE
FDX2_MOUSE
CEPT1_RAT
CBX3_MOUSE
FCSD2_MOUSE
NMDE1_RAT
LIGO1_MOUSE
USO1_RAT
KCNA2_RAT;KCNA3_RAT
MDR1_RAT;MDR3_RAT;SO2B1_RAT
INT8_MOUSE
RS16_MOUSE;RS16_RAT
SETD3_MOUSE
EMC8_MOUSE
NCK1_MOUSE
PEX3_MOUSE
TMCC3_MOUSE
SAHH2_MOUSE;SAHH2_RAT
MANF_MOUSE
DTD1_MOUSE
YIPF4_MOUSE
NEUM_MOUSE;NEUM_RAT
HS71A_MOUSE
DMXL1_MOUSE
CC115_MOUSE
FUT8_MOUSE
F162A_MOUSE
ASIC1_MOUSE
GSTA3_MOUSE
CC50A_MOUSE;CC50B_MOUSE
GLSK_MOUSE;GLSK_RAT
UBP47_MOUSE
MMSA_MOUSE
SCLY_MOUSE
P4HA1_MOUSE
MYPT1_RAT
TCPD_MOUSE;TCPD_RAT
SET_MOUSE
PLCL1_RAT
CYTM1_MOUSE
PSB6_MOUSE
PSMD6_MOUSE
SMU1_MOUSE
SDC4_RAT;SDC4_MOUSE
NRX3A_RAT;NRX3A_MOUSE;NRX3B_MOUSE
MLP3B_MOUSE
NDUBB_MOUSE
VP33B_MOUSE
PGDH_MOUSE
CRKL_MOUSE
MINT_MOUSE
RS18_MOUSE
PSB1_MOUSE
CSN4_MOUSE
PSPC1_MOUSE
INO1_MOUSE
GCSH_MOUSE
ARRB1_MOUSE;ARRB1_RAT;ARRB2_MOUSE;ARRB2_RAT;ARRC_RAT
GBRB2_MOUSE
GRIA2_RAT
M1IP1_MOUSE
CAC1A_RAT;CAC1A_MOUSE
MAP11_MOUSE
PHAX_MOUSE
ADAP2_MOUSE
T151A_MOUSE
TMX4_MOUSE
FGF1_MOUSE
EX3L1_MOUSE
KIF1A_MOUSE
PP1A_MOUSE
RT29_MOUSE
PDIA1_MOUSE
BNI3L_MOUSE
S13A3_RAT
PP2BA_MOUSE;PP2BA_RAT
GLT16_MOUSE
RN214_MOUSE
IF4A2_MOUSE;IF4A2_RAT;IF4A3_RAT
7B2_MOUSE
CTR1_RAT
HBB2_MOUSE;HBB1_MOUSE
F185A_MOUSE
ABCD3_MOUSE
RTCB_MOUSE
ICLN_MOUSE
MIO_MOUSE
MOFA1_MOUSE
MYL3_RAT
AT2C1_MOUSE
PSMD3_MOUSE
CLC2L_MOUSE
FRDA_MOUSE
K1C17_MOUSE;K1C17_RAT;K1C18_RAT;K1C19_RAT;K1C20_MOUSE;K1C23_MOUSE;K1C24_MOUSE;K1C24_RAT;KRT35_MOUSE
CXAR_MOUSE
K1C16_MOUSE
PAPS1_MOUSE
APC4_MOUSE
DYHC1_MOUSE
TM163_MOUSE
KIF23_MOUSE
ARI2_MOUSE
PPR21_MOUSE
RBGPR_RAT
RS23_MOUSE;RS23_RAT
ENSA_MOUSE
NDUA3_MOUSE
UBA1_RAT
PC4L1_MOUSE
SPCS_MOUSE
AMRP_MOUSE
NCEH1_MOUSE
SDCG8_MOUSE
EIF3A_RAT;EIF3A_MOUSE
FAHD2_MOUSE
VMA5A_MOUSE
TMCO1_MOUSE;TMCO1_RAT
IF4A1_MOUSE
PEX12_MOUSE
PP4C_MOUSE
ENDD1_MOUSE
TNPO2_MOUSE
CXA1_RAT
EMB_MOUSE
EIF3B_RAT
CNTN1_RAT
RNAS4_MOUSE
HYDIN_MOUSE
BID_MOUSE
CLCN7_RAT
CAMLG_MOUSE
ABCB6_RAT
DDX1_MOUSE
FXYD7_MOUSE
C56D2_RAT
RL23_MOUSE
T22D1_MOUSE;T22D1_RAT
S14L2_MOUSE
AGM1_MOUSE
UFD1_MOUSE
T22D3_MOUSE
MICA3_MOUSE
TNG2_MOUSE
NFH_MOUSE
SNX3_MOUSE
CPNE4_MOUSE
RHEB_MOUSE;RHEB_RAT;MRP3_MOUSE
IGLO5_MOUSE
CREST_MOUSE
BEND6_MOUSE
GSTA1_MOUSE;GSTA2_MOUSE
NFIP2_MOUSE
FUS_MOUSE
LRC8D_MOUSE
SHRM2_MOUSE
CCDC9_MOUSE
QCR2_RAT
GDIA_MOUSE
EHD1_MOUSE
KITM_MOUSE
UQCC2_MOUSE
WDR1_MOUSE
MAEA_MOUSE
K1C10_RAT;K1C25_MOUSE;K1C25_RAT
TP53B_MOUSE
BRE1B_MOUSE
PHLP_MOUSE
PTPRD_MOUSE
PGTA_MOUSE
STAT2_MOUSE
ABHD4_MOUSE
VLDLR_MOUSE
PLD1_RAT;PLD1_MOUSE
RRN3_MOUSE
NCAM1_RAT
ACBG1_MOUSE
PMGT2_MOUSE
PREB_MOUSE
KCC2D_MOUSE
2ABG_MOUSE
PPIH_MOUSE
EHBP1_MOUSE
RRBP1_MOUSE
MAIP1_MOUSE
PYC_RAT
GID8_MOUSE
FERM2_MOUSE
PAHX_MOUSE
GAS2_MOUSE
VPS45_MOUSE
RM19_MOUSE
SUOX_MOUSE
RHOF_MOUSE
BCAR3_MOUSE
FSD1L_MOUSE
NECT1_MOUSE
MYH9_MOUSE
TP4A1_MOUSE;TP4A2_MOUSE
THIL_MOUSE;THIL_RAT
RAB7B_MOUSE
KKCC2_MOUSE
BASP1_MOUSE
AP3M2_RAT
CCD12_MOUSE
GPM6B_MOUSE;GPM6B_RAT
VAMP7_MOUSE;VAMP7_RAT
ERLN2_MOUSE;ERLN1_MOUSE
TCPB_MOUSE
GOSR1_MOUSE
MICU1_MOUSE
F8I2_MOUSE
MYG1_MOUSE
TP8L2_MOUSE
SNR27_MOUSE
TPC_MOUSE
ERF3B_MOUSE
KI67_MOUSE
ITPA_MOUSE
CISD3_MOUSE
CAVN3_MOUSE
CPSF6_MOUSE
DPYL1_MOUSE;DPYL1_RAT
TOX_MOUSE
SPTB1_MOUSE
SYQ_MOUSE
EPHB3_MOUSE;EPHB4_MOUSE
COG5_MOUSE
CALX_MOUSE;CALX_RAT
TPC13_MOUSE
GFOD2_MOUSE
DNJB2_MOUSE
CA2D2_RAT;CA2D2_MOUSE
USP9X_MOUSE
IF1AX_MOUSE;IF1A_MOUSE
LYRIC_MOUSE
SMAD2_MOUSE;SMAD3_MOUSE
NDUS1_RAT
PRUN1_MOUSE
MUG1_RAT;A1I3_RAT;MUG2_RAT
UBE2O_MOUSE
RS25_MOUSE
LBR_RAT
KCD12_MOUSE
MY18A_MOUSE
SDF2L_MOUSE
EVA1B_MOUSE
GRP2_MOUSE
PSMD1_MOUSE
RBBP9_MOUSE
COX41_RAT
BSCL2_RAT
SYAP1_MOUSE
GORS2_MOUSE
RD23A_MOUSE
TM135_MOUSE
MGN_MOUSE
GRPE1_MOUSE
BAG5_MOUSE
LRRT4_MOUSE
DYN1_RAT
SMC1A_RAT;SMC1A_MOUSE
CSN1_MOUSE
PRS6A_MOUSE
NFS1_MOUSE
ECT2_MOUSE
U520_RAT
TSR2_MOUSE
TRFE_MOUSE;ICA_MOUSE
ERC2_MOUSE
NSD3_MOUSE
XRCC5_MOUSE
UBCP1_MOUSE
CMTD1_MOUSE
COR1C_MOUSE
BIG3_MOUSE
NJMU_MOUSE
BT3L4_MOUSE
HS90B_MOUSE;HS90B_RAT;ENPL_RAT
ACLY_RAT
GEMI6_MOUSE
AMPH_RAT
CL004_MOUSE
NDUA4_MOUSE
CNOT1_MOUSE
FUBP1_MOUSE
KPYM_MOUSE;KPYR_MOUSE;KPYR_RAT
GRDN_MOUSE
CLIP2_RAT
UBE2H_MOUSE
EVL_MOUSE
CATIN_MOUSE
MK12_MOUSE
CAN7_MOUSE
COF2_MOUSE
PP1RA_MOUSE
CLAP2_RAT
MACF1_MOUSE
KCC4_MOUSE
EHD3_MOUSE
CLPT1_MOUSE
AGO2_MOUSE;AGO3_MOUSE
ATLA1_MOUSE;ATLA1_RAT
A4_MOUSE;A4_RAT
RP3A_MOUSE;DOC2B_MOUSE
SCN3B_MOUSE
RPB4_MOUSE
EDC3_MOUSE
MAG_RAT
MEGF8_MOUSE
TLN1_MOUSE
SHPS1_MOUSE
IGSF1_MOUSE;IGSF1_RAT
DUS14_MOUSE
ERG7_MOUSE
HNRPL_MOUSE
QORL1_MOUSE
EF1G_RAT
RS11_MOUSE
FIG4_MOUSE
ZW10_MOUSE
NAA20_MOUSE
F234B_MOUSE
MBOA2_RAT
KCC2B_MOUSE;KCC2B_RAT;KCC2D_RAT
SLIK5_MOUSE
PTMS_MOUSE
COAC_MOUSE
TCPE_MOUSE
NMDE4_RAT
HAP1_MOUSE
GD1L1_MOUSE
TRM5_MOUSE
ADA22_MOUSE
ENOB_MOUSE
CTRO_MOUSE
FLRT2_MOUSE
SMRC2_MOUSE
CC178_MOUSE
SAC1_MOUSE
GCST_MOUSE
STB5L_MOUSE
ITPR3_MOUSE
TM165_RAT
ELFN1_MOUSE
SCN1B_MOUSE
3BP5L_MOUSE
ARMC1_MOUSE
RL29_RAT
GALK1_MOUSE
TTC9A_MOUSE
ECHA_MOUSE
PRAF1_MOUSE
SHOC2_MOUSE
AQP4_MOUSE
ZMIZ1_MOUSE
AHI1_RAT
TFIP8_MOUSE
RM22_MOUSE
MYL1_RAT
TMCC2_MOUSE
PKHO2_MOUSE
JAGN1_RAT
S38A1_RAT
RL36_RAT
ACSL3_MOUSE
RPN2_MOUSE
ADA2A_RAT
IREB2_MOUSE
NISCH_MOUSE
PPCE_MOUSE;PPCE_RAT
SIDT2_RAT
MTMR2_MOUSE
RAB13_MOUSE
SAT2_MOUSE
ARFG1_MOUSE
HECD3_MOUSE
BICD2_MOUSE
GALT1_MOUSE
RGS18_MOUSE
SNPH_RAT
ZFAN5_MOUSE
PSMD7_MOUSE
GPDA_MOUSE
KCIP1_MOUSE
CATL1_MOUSE
SLAI2_MOUSE
PLAP_MOUSE
FKBP8_MOUSE
FTO_MOUSE
ODBA_MOUSE
SYDM_MOUSE
RPGF4_MOUSE
2ABD_MOUSE
ACATN_MOUSE
METH_RAT
LETM1_MOUSE
COG3_MOUSE
MBTP1_RAT
URGCP_MOUSE
ERIP6_MOUSE
DDRGK_MOUSE
FRY_MOUSE
VPS18_MOUSE
2ABA_MOUSE
ARP19_MOUSE
AP1B1_RAT
FBP1L_MOUSE
MAGI1_RAT
CLIP3_MOUSE
ANR44_MOUSE
TM222_MOUSE
VPS36_MOUSE
AKAP5_RAT
S38A2_RAT
PLCX2_MOUSE
PYM1_MOUSE
SO1A3_RAT
PLD3_MOUSE
CD123_MOUSE
SDF2_MOUSE
NUCKS_MOUSE
UCP5_MOUSE
TBA1A_MOUSE;TBA3_MOUSE
CAPS2_MOUSE
SYNE1_MOUSE
CTL1_RAT;CTL1_MOUSE
HABP4_MOUSE
TYB10_MOUSE
ODP2_MOUSE
SNX32_MOUSE
KCNJ6_RAT
TTC5_MOUSE
TM100_MOUSE
PCP4_MOUSE
AT1A3_RAT;AT12A_RAT;ATP4A_RAT;ATP4A_MOUSE;LSME1_MOUSE
WDR92_MOUSE
MP2K4_MOUSE
LNP_MOUSE
PARVB_MOUSE
K895L_MOUSE
AGRIN_RAT
TECR_RAT;TECR_MOUSE
TBPL1_MOUSE
MK03_MOUSE
HXK1_RAT
NUD10_MOUSE
MARCS_RAT
ARPC5_MOUSE
TMM33_RAT
LPCT4_MOUSE
AT1A4_RAT
AAK1_RAT
PSD13_MOUSE
ATR_MOUSE
SRP54_MOUSE
TCHP_MOUSE
FEN1_MOUSE
S2546_MOUSE
SFR19_RAT
PZRN3_MOUSE
NDUV2_MOUSE
ADCY8_MOUSE
IR3IP_RAT
K22E_MOUSE
LGI1_MOUSE
PCBP3_MOUSE
BASP1_RAT
ASCC1_MOUSE
CA021_MOUSE
PTMA_MOUSE
EFR3B_MOUSE
DZAN1_MOUSE
RF1M_MOUSE
TM9S2_RAT
MIEN1_MOUSE
MUC18_MOUSE
CADH7_MOUSE
ARL1_MOUSE
SNF5_MOUSE
MAG_MOUSE
ACSL1_MOUSE;ACSL1_RAT;ACSL5_MOUSE
SYN1_RAT
PMS2_MOUSE
SF3B4_MOUSE
DGKG_MOUSE
MYH14_MOUSE
NOS1_RAT;NOS3_RAT
UCHL5_MOUSE
MYO16_RAT
LRC45_MOUSE
V1AR_MOUSE
NAGAB_MOUSE
SPSY_MOUSE
GBRB3_RAT;GBRB3_MOUSE
DACT3_MOUSE
NDUS1_MOUSE
VPS4B_MOUSE
ABCBB_RAT
TMM51_MOUSE
KCNA1_MOUSE
PSA2_MOUSE
CAD13_MOUSE
HNRDL_MOUSE
NDUF4_MOUSE
GALT3_MOUSE
ITAV_MOUSE
WASL_MOUSE
MTU1_MOUSE
SHAN2_MOUSE
PSB4_MOUSE
SYTL2_MOUSE
ADRM1_RAT
TPP1_MOUSE
STAM1_MOUSE
MITD1_MOUSE
BDH2_MOUSE
LBH_MOUSE
CRF_MOUSE
RBP2_MOUSE
MSPD2_MOUSE
PHP14_MOUSE
RT05_MOUSE
MYO5A_MOUSE
MYL9_MOUSE
IF5A1_MOUSE
MPZL1_MOUSE
AFG32_MOUSE
AT1B1_MOUSE
LX12B_MOUSE
PDP1_MOUSE
NDUF3_MOUSE
UAP1_MOUSE;UAP1L_MOUSE
MNDAL_MOUSE
SPRY4_MOUSE
CHD8_RAT
ITF2_MOUSE
FMO5_MOUSE
OXR1_RAT
SYTL5_MOUSE
MTL26_MOUSE
TDRD7_MOUSE
PLCB3_RAT;PLCB3_MOUSE
HIKES_MOUSE
CK5P1_MOUSE
GBRL1_MOUSE
SP1_MOUSE
CXG2_MOUSE
GALE_MOUSE
TM9S3_MOUSE
SPT20_MOUSE
TM87A_MOUSE
MXRA7_MOUSE
UBE2Z_MOUSE
ADPRH_MOUSE
DAAF5_MOUSE
NDEL1_MOUSE;NDE1_MOUSE
NPTX1_MOUSE
BBS2_MOUSE
ACE2_MOUSE
GNS_MOUSE
LOXE3_MOUSE
P20D2_MOUSE
METK2_MOUSE;METK1_MOUSE
GRAN_MOUSE
RPRD2_MOUSE
LIGO2_MOUSE
PFD3_MOUSE
UBP20_MOUSE
SPAG7_MOUSE
CISD2_MOUSE
BACH_MOUSE
PKN2_MOUSE
CHIN_MOUSE
DEMA_MOUSE
SDC3_RAT
AT2A2_RAT;AT2A1_RAT;AT2A3_RAT
TBL2_MOUSE
CD81_RAT;CD81_MOUSE
NLTP_MOUSE
TAF6_MOUSE
CE290_MOUSE
SHRM2_RAT
CALU_MOUSE
PPIB_MOUSE
ORNT1_MOUSE
RUSC1_MOUSE
CH058_MOUSE
PURA_MOUSE
CYTC_RAT
CXG2_RAT
MBOA5_RAT
SPKAP_MOUSE
APLP2_MOUSE
ST32C_MOUSE
STAT1_MOUSE
HDAC2_MOUSE
PPBT_MOUSE
RL3_MOUSE
RB33B_MOUSE
I2BP1_MOUSE
PFKAL_MOUSE
SPON1_MOUSE
IMDH2_MOUSE
TTC1_MOUSE
ZFR_MOUSE
Z518A_MOUSE
BAX_MOUSE
CC171_MOUSE
GDE1_MOUSE
CXB1_RAT;CXB1_MOUSE
PSA3_MOUSE
QKI_MOUSE
COMD4_MOUSE
OGFR_MOUSE
HOT_MOUSE
RMC1_MOUSE
NNTM_MOUSE
EMC10_MOUSE
NUP98_MOUSE
KCNH1_RAT
TY3H_MOUSE
CA198_MOUSE
LRC40_MOUSE
CPNE9_MOUSE
DCAM1_MOUSE
STXB2_MOUSE
RL23A_MOUSE;RL23A_RAT
RABL3_MOUSE
ZN593_MOUSE
ERLEC_MOUSE
FBX2_MOUSE
C2C4C_MOUSE
SCN1A_RAT;IWS1_RAT
YDJC_MOUSE
NECP1_MOUSE
AT1A2_RAT
DD19A_MOUSE;DDX25_MOUSE;DDX25_RAT
CAMKV_RAT
ARMX3_MOUSE
IMB1_MOUSE
C170B_MOUSE
NUDT3_MOUSE
RBM3_MOUSE
CC018_MOUSE
GRIA4_MOUSE
BTBDH_MOUSE
SQSTM_MOUSE
MCM10_MOUSE
KATL1_MOUSE
DLDH_MOUSE
LRIG2_MOUSE
NRP2_MOUSE
QCR6_MOUSE
RRAS_MOUSE
DJC11_MOUSE
NUB1_MOUSE
COX1_RAT;COX1_MOUSE
RHG24_MOUSE
SYF2_MOUSE
EPN1_MOUSE
MICU3_MOUSE
SGIP1_RAT
RM38_MOUSE
ENPP4_MOUSE
GLUCM_MOUSE
CTNA2_MOUSE
SMG7_MOUSE
DNMT1_RAT
AOFA_MOUSE
RTKN_MOUSE
KCNC2_RAT;KCNC2_MOUSE
PP14A_MOUSE
CAVN1_MOUSE
MRO2B_MOUSE
EMAL3_MOUSE
SRRM2_MOUSE
ACDSB_MOUSE
COQ8B_MOUSE
MCES_MOUSE
ITM2B_MOUSE
RU1C_MOUSE
PSD3_MOUSE
FGF13_MOUSE
GRIA1_MOUSE
TLN2_MOUSE
AT8A2_MOUSE
PEX13_MOUSE
TM263_MOUSE
GSK3A_MOUSE
PCMD1_MOUSE
UGGG1_RAT;UGGG1_MOUSE
TOP2B_MOUSE
KBTB3_MOUSE
RYR2_RAT
SCOC_MOUSE
AGFG2_MOUSE
TRM1_MOUSE
ENPP2_MOUSE
RFTN2_MOUSE
HBAZ_MOUSE
PHIPL_MOUSE
MAST1_RAT;AKT2_RAT;GWL_MOUSE;MAST2_MOUSE;MAST4_MOUSE
WDR20_MOUSE
IMA4_MOUSE
UBX2A_MOUSE
SCRN1_MOUSE
DECR2_MOUSE
DYST_MOUSE
SETD7_MOUSE
RIT1_MOUSE
PHKG1_MOUSE
ECE2_MOUSE
CLH1_RAT;CLH1_MOUSE
P66B_MOUSE
ARMD3_MOUSE
KIRR3_MOUSE
PTPC1_MOUSE
ELAV4_MOUSE
LAMB2_RAT
RNBP6_MOUSE
ODO1_RAT
AT1B2_RAT
CO7A1_MOUSE
SLIT2_RAT
PLXA1_MOUSE
S23A2_RAT
TM186_MOUSE;TM186_RAT
ID4_MOUSE
FBXL4_MOUSE
ICT1_MOUSE
GAK_MOUSE
ZWINT_MOUSE
TPPP3_MOUSE;TPPP2_MOUSE
PO210_RAT
VP26B_MOUSE
RFC2_MOUSE
AT1B3_RAT
SYUB_MOUSE
ARMX2_MOUSE
RIR2B_MOUSE
AT2C1_RAT
PCY1A_MOUSE
SMRD3_MOUSE
LRP4_RAT
SO3A1_MOUSE
MIC19_MOUSE
CE128_MOUSE
STK25_MOUSE
CYB5B_MOUSE;CYB5B_RAT
CHIO_MOUSE
GABR1_RAT;GABR1_MOUSE
ADCY5_RAT;ADCY6_RAT
FMN2_MOUSE
PTPRT_MOUSE
PKN3_MOUSE
DNJA3_MOUSE
GDN_MOUSE
SRSF5_MOUSE
F136A_MOUSE
ZN511_MOUSE
NUD19_MOUSE
TBA1B_MOUSE;TBA1B_RAT;TBA1A_RAT;TBA1C_RAT;TBA3_RAT;TBA8_RAT
HSP74_RAT
GBRB2_RAT
NUCB2_MOUSE
CALB2_MOUSE
PPAC_MOUSE
CC85C_MOUSE
KAT1_MOUSE
CYH1_MOUSE;CYH2_MOUSE;CYH4_MOUSE
RL24_MOUSE
MPP2_MOUSE
ANM3_MOUSE
TENR_RAT;GPCP1_RAT
NH2L1_MOUSE
CX7A2_RAT
BDH_MOUSE
WDR6_RAT
SH2D5_MOUSE
K2C79_MOUSE
CHD1L_MOUSE
GGA1_MOUSE
S100B_MOUSE
ECHB_MOUSE
RL27A_MOUSE
NSF_RAT
F10A1_MOUSE
UBE2B_MOUSE
HDDC2_MOUSE
CSPG5_RAT;CSPG5_MOUSE
VP37C_MOUSE
S27A4_MOUSE
CP46A_MOUSE
CCD66_MOUSE
G3BP1_MOUSE
LARP6_MOUSE
PTGR2_MOUSE
NEP_MOUSE
PCYOX_MOUSE
GCC1_MOUSE
FR1OP_MOUSE
PYGM_RAT
AOFB_MOUSE;AOFB_RAT
WASF3_MOUSE
UBIM_MOUSE
RL21_MOUSE;RL21_RAT
PGK1_MOUSE;PGK1_RAT
E41LB_MOUSE
MIA40_MOUSE
KPCA_MOUSE
HOOK1_MOUSE
PGAM2_RAT
PXL2B_MOUSE
RHDF1_MOUSE
SYYM_MOUSE
A2MG_RAT
EAA2_RAT
PRXD1_MOUSE
MP2K7_MOUSE
FEZ1_MOUSE
TBB3_MOUSE;TBB3_RAT
SNX14_MOUSE
PTN12_MOUSE
CLCC1_MOUSE
VKORL_RAT
TEFM_RAT
ATF2_MOUSE
RBTN1_MOUSE
ATG9A_RAT
EF1A2_MOUSE
RAB3B_MOUSE;RAB3B_RAT
PSB6_RAT
IF2B_MOUSE
RHG01_MOUSE
PIHD1_MOUSE
GAMT_MOUSE
KI21A_MOUSE
APMAP_MOUSE
ABL2_MOUSE
KIT_MOUSE
DPYL5_MOUSE
ACBP_MOUSE
GLRB_RAT
ADDB_RAT
GELS_MOUSE
RTN3_RAT
SPRE1_MOUSE;SPRE2_MOUSE
ADCY4_RAT
MA6D1_MOUSE
SMAD1_MOUSE
CUL3_MOUSE;MRCKB_MOUSE
ACINU_MOUSE
TM175_RAT
EMAL1_MOUSE
RASL1_MOUSE
GSTP2_MOUSE
IDH3A_MOUSE
SAR1A_MOUSE
T2FA_MOUSE
APC5_MOUSE
PKHA1_MOUSE
UBP48_MOUSE
LAMP1_RAT
PR40A_MOUSE
MIB2_MOUSE
TMED8_MOUSE
RCAN1_MOUSE
ANM1_MOUSE;ANM1_RAT
CARL2_MOUSE
GFOD1_MOUSE
CPSF7_MOUSE
GNA12_MOUSE
DNJB4_MOUSE
EF1B_MOUSE
CEP63_RAT
TPPC1_MOUSE
S10AG_MOUSE
RL15_MOUSE;RL15_RAT
YIF1B_MOUSE;YIF1B_RAT
PAIP1_MOUSE
STUM_MOUSE
BFAR_RAT
RAC1_MOUSE;RAC1_RAT
CKAP5_MOUSE
IFT22_MOUSE
CNNM2_MOUSE
DPYL2_MOUSE;DPYL2_RAT
ENOG_MOUSE;ENOG_RAT
DUS3L_MOUSE
FXL16_MOUSE
SV2A_RAT;SV2A_MOUSE
GPN3_MOUSE
SWP70_MOUSE
RMXL1_MOUSE
SYT7_MOUSE
AGO1_MOUSE;AGO2_RAT;AGO4_MOUSE
P2Y12_RAT
MYO9A_RAT
ZNT9_MOUSE
KCAB1_MOUSE
FYN_MOUSE;FGR_MOUSE;LCK_MOUSE;CDK12_MOUSE;CDK17_RAT;FGFR1_RAT;FGFR4_RAT
MPRD_MOUSE
DEP1B_MOUSE
CNO11_MOUSE
WIPI2_MOUSE;WIPI2_RAT
ROBO1_RAT
DCAF7_MOUSE
EDIL3_MOUSE
LMTK3_MOUSE
NU1M_RAT;NU1M_MOUSE
PLCD3_MOUSE
PEPL1_MOUSE
PPR37_MOUSE
SSDH_MOUSE
SHAN3_MOUSE
AGAP3_MOUSE
GAB1_MOUSE
WASC4_MOUSE
EFTU_RAT
FANCI_MOUSE
PRP4B_RAT;PRP4B_MOUSE
TCPG_MOUSE
MPPB_MOUSE
ZN512_MOUSE
THNS1_MOUSE
AAA1_MOUSE
DHX30_MOUSE
GMPR2_MOUSE
DOCK9_RAT
ABHD3_MOUSE
F234A_MOUSE
TPPC3_MOUSE
FABD_MOUSE
DPOLQ_MOUSE
NUDT4_MOUSE
GRM7_RAT
SGPL1_MOUSE
SPS2_MOUSE
MACF1_RAT
RS5_MOUSE
WWP2_MOUSE
HID1_MOUSE
CABYR_MOUSE
CHSP1_MOUSE
ECHA_RAT
PPM1A_MOUSE;PPM1B_MOUSE
RPC9_MOUSE
RT16_MOUSE
SYDC_MOUSE
SGT1_MOUSE
PRC2A_RAT;PRC2A_MOUSE
TIP_MOUSE
VPS29_MOUSE
TB182_MOUSE
KAT7_MOUSE
GPAT1_MOUSE
PGM1_MOUSE;PGM1_RAT
EF1D_MOUSE
LANC1_MOUSE;LANC1_RAT
PLST_MOUSE
TRI46_MOUSE
ARH40_MOUSE
GGT1_MOUSE
FGD2_MOUSE
COR2B_MOUSE
PATL1_MOUSE
ZPR1_MOUSE
S4A7_RAT
LARP4_MOUSE
FCSD1_MOUSE
SIR4_MOUSE
PRAF3_RAT;PRAF3_MOUSE
SF3B3_MOUSE
LKHA4_MOUSE
WDR7_RAT;WDR7_MOUSE
PDE1B_MOUSE
RP1_MOUSE
ELP4_MOUSE
TEBP_MOUSE
NFL_MOUSE
DNJA4_MOUSE
RL34_MOUSE;RL34_RAT
SHPS1_RAT
DJB14_MOUSE
TXND5_MOUSE
PCY1B_MOUSE
RM17_MOUSE
DCAKD_MOUSE
CC85B_MOUSE
GCFC2_MOUSE
CPLX3_MOUSE
ZC3HF_MOUSE
OPA1_MOUSE;TLR8_MOUSE
RF1ML_MOUSE
ATPA_RAT
KCC1A_MOUSE
3BHS4_MOUSE
WIPF1_MOUSE
ILK_MOUSE
OXND1_MOUSE
COX5B_MOUSE
RWDD4_MOUSE
SNX5_MOUSE
EMC4_MOUSE
ATPO_MOUSE
SRS10_MOUSE
JIP2_RAT
UBFD1_MOUSE
KLC2_MOUSE
GRP75_MOUSE
S27A1_MOUSE
GBRG2_RAT;GBRG2_MOUSE;GBRG1_MOUSE
DPP8_MOUSE
ARI1_MOUSE
S6A11_MOUSE
MD2L1_MOUSE
SNPH_MOUSE;SYBU_MOUSE
T120A_RAT
ADPPT_MOUSE
COF1_MOUSE
CIDEA_MOUSE
SRRM1_MOUSE
DPOD1_RAT
ZFAN6_MOUSE
RBG1L_MOUSE
KCNA1_RAT
CPLX2_MOUSE
GBG7_MOUSE;GBG7_RAT
HIP1_MOUSE
DNPH1_MOUSE
S27A2_RAT
NUDT9_MOUSE
CDS1_RAT
NDRG4_MOUSE
GRAM4_MOUSE
FAS_RAT;FAS_MOUSE
KAT3_MOUSE
RAB10_MOUSE;RAB10_RAT;RAB15_RAT
NDUB7_MOUSE
IMPA3_MOUSE
M4K2_MOUSE
PAK5_MOUSE
VAMP8_MOUSE
STXB1_MOUSE;STXB1_RAT
FLRT3_MOUSE
ATCAY_MOUSE
TMUB1_MOUSE
EXOS9_MOUSE
GUAA_MOUSE
GABT_MOUSE
KAD4_MOUSE
ERMIN_MOUSE
DDX21_MOUSE
MUC2L_RAT
EIF3F_MOUSE
GASP2_MOUSE
SNX30_MOUSE
IF172_RAT
RENBP_MOUSE
TM9S4_RAT;TM9S4_MOUSE
SOS1_MOUSE;SOS2_MOUSE
PIMT_MOUSE
5NT3B_MOUSE
PCBP1_MOUSE;PCBP4_MOUSE
VPS4A_MOUSE;FIGL1_MOUSE
CCZ1_MOUSE
CYGB_MOUSE
ATG3_MOUSE
TRAP1_MOUSE
KAD1_MOUSE
PMGE_MOUSE
NRX1A_RAT;NRX1B_RAT;NRX1A_MOUSE;NRX1B_MOUSE
TOP3B_MOUSE;TOP3A_MOUSE
KIME_MOUSE
KCTD8_MOUSE
SYHM_MOUSE
TMM33_MOUSE
NDUAB_RAT
SV2C_RAT
PNMA2_MOUSE
MFA1A_MOUSE
HNRL1_MOUSE
IPYR_MOUSE
HNRPD_MOUSE
ESYT1_MOUSE;ESYT1_RAT
PP2BC_MOUSE
1433F_MOUSE;1433F_RAT
MAP1A_RAT;PRL_RAT
ARMT1_MOUSE
ATP8_RAT
K2C72_MOUSE
CC177_MOUSE
SCRB2_MOUSE
SEPT8_MOUSE
PAPD1_MOUSE
BLMH_MOUSE
TEN2_RAT;TEN2_MOUSE
UBXN6_MOUSE
AGAL_MOUSE
PYGL_MOUSE
RAB2A_MOUSE;RAB2A_RAT
PI4KB_MOUSE
LRFN1_MOUSE
PTSS1_RAT;PTSS1_MOUSE
STML2_MOUSE
PRC2C_MOUSE
G37L1_MOUSE;G37L1_RAT
RL26_MOUSE;RL26_RAT
LRFN3_MOUSE
MCTS1_MOUSE;MCTS2_MOUSE
CK054_MOUSE
TOM22_MOUSE
ANM5_MOUSE
FXR2_MOUSE
AT1A1_RAT
IF4H_MOUSE
DAD1_RAT
NMT2_MOUSE
CP070_MOUSE
PTH2_MOUSE
SIAS_MOUSE
RNF14_MOUSE
KCRU_MOUSE;KCRS_MOUSE
NELFB_MOUSE
TXD17_MOUSE
P33MX_MOUSE
NUP43_MOUSE
SORT_MOUSE
DYHC1_RAT
UB2Q1_MOUSE;UB2Q2_MOUSE
TGON1_MOUSE
FIBP_MOUSE
THIM_MOUSE
LACTB_MOUSE
VATL_MOUSE;VATL_RAT
S45A1_RAT
RAB24_MOUSE
ZDH17_RAT
AACS_MOUSE
PFD1_MOUSE
RU2A_MOUSE
FLNB_MOUSE
SL9A1_RAT
CCD25_MOUSE
TLE3_MOUSE;TLE1_MOUSE
PARG_MOUSE
BSDC1_MOUSE
ABHGA_MOUSE;ABHGB_MOUSE
RM01_MOUSE
RS15_MOUSE
CBX1_MOUSE
DREB_MOUSE
PHLB1_MOUSE
HEBP1_MOUSE
ILVBL_MOUSE
ARP2_MOUSE
INT7_MOUSE
HYI_MOUSE
KC1A_MOUSE
FND3A_MOUSE
FOLH1_RAT
KCNC3_MOUSE
RBM8A_MOUSE
NDUB9_MOUSE
SCN4B_MOUSE
VIR_MOUSE
KIF3C_MOUSE
NCKX3_RAT
VPS39_MOUSE
BTF3_MOUSE
RM48_MOUSE
CAV1_MOUSE;CAV3_MOUSE
ASAP1_MOUSE
PREP_MOUSE
ERP44_MOUSE
PGPS1_MOUSE
MEP50_MOUSE
TDRP_MOUSE
LUZP2_MOUSE
DUS15_MOUSE
HPBP1_MOUSE
AATC_RAT
GRAP1_MOUSE;CB068_MOUSE
S12A9_RAT;S12A9_MOUSE
SPD2A_MOUSE
AFG1L_MOUSE
MFTC_MOUSE
CDC42_MOUSE;CDC42_RAT
ESYT2_MOUSE
COPD_MOUSE
SYEP_MOUSE
LTOR1_MOUSE
ABCF2_MOUSE
PGLT1_MOUSE
ODO2_MOUSE;ODO2_RAT
CSDE1_MOUSE
NT5D3_MOUSE
[truncated: 452 more rows]

## Sheet: Additional Table 3
No Sex Differences
Highlighted= statistically significant
Accession
1433S_MOUSE
ABC8B_MOUSE
ABHDD_MOUSE
ACOT6_MOUSE
ACTC_MOUSE;ACTS_MOUSE
ACTN3_MOUSE
ACTT3_MOUSE
ADH1_MOUSE;ADH1_RAT
ADPGK_MOUSE
AFAM_MOUSE
AFG31_MOUSE
AGRA3_MOUSE
AKAP9_MOUSE
AL1L2_MOUSE
ANR16_MOUSE
AP2A_MOUSE
ARMX6_MOUSE
AT2A1_MOUSE
AT2A3_MOUSE
AXIN2_RAT
BDP1_MOUSE
BEND7_MOUSE
BIN3_MOUSE
BNIP2_MOUSE
BRPF1_MOUSE
BRWD1_MOUSE
CACP_RAT
CALCB_MOUSE
CCD96_MOUSE
CD036_MOUSE
CD048_MOUSE
CDK9_MOUSE
CHD4_MOUSE
CNDG2_MOUSE
COPG2_RAT
CP4CA_MOUSE
CP250_MOUSE
CPNE3_MOUSE
CSF1R_RAT
CUBN_RAT
DCA10_MOUSE
DEND3_MOUSE
DEPD5_MOUSE
DYH17_MOUSE
DYSF_MOUSE
EPN3_MOUSE
ESRP2_MOUSE
EVC_MOUSE
F10C1_MOUSE
F13A_MOUSE
F198B_MOUSE
FACD2_MOUSE
FAKD4_RAT
FGF14_MOUSE
FMN1_MOUSE
FRK_MOUSE
GBB3_MOUSE
GBGT1_MOUSE
GBP1_MOUSE
GNA12_RAT
GNA14_MOUSE
GRHL3_MOUSE
GRTP1_MOUSE
GYS2_MOUSE
HKDC1_MOUSE
HMCN2_MOUSE
HYAS1_MOUSE
ISL1_RAT
K1C12_RAT
K1C13_MOUSE;K1C13_RAT
K1C14_MOUSE;K1C14_RAT
K1C15_MOUSE;K1C15_RAT
K1C19_MOUSE
K1C20_RAT
K2C1B_MOUSE
K2C1B_RAT
K2C7_MOUSE
K2C8_RAT
K2C73_MOUSE
K2C74_MOUSE
KCA10_MOUSE
KCIP2_MOUSE
KCNA5_MOUSE;KCNA5_RAT
KIF1B_MOUSE
KIFC2_MOUSE
KRT81_MOUSE
KS6A6_MOUSE
LGR6_MOUSE
LINES_MOUSE
LRIQ3_RAT
M4K4_MOUSE
MEIOC_MOUSE
MTDC_MOUSE
MXRA8_MOUSE
MYCB2_MOUSE
MYH4_RAT
MYH7B_MOUSE
MYL1_MOUSE
MYLK2_MOUSE
NDUV3_MOUSE
NOL6_MOUSE
NOP58_RAT
NR1I3_MOUSE
OPRM_RAT
OSBP2_MOUSE
P3H2_MOUSE
P4HA1_RAT
P210L_MOUSE
PCM1_MOUSE
PGK2_MOUSE
PLS1_MOUSE
POPD3_MOUSE
PPOX_MOUSE
PSB8_MOUSE
PUM3_MOUSE
QCR7_MOUSE
RAB3D_RAT
RB_MOUSE
RBL2_MOUSE
RBM43_RAT
RHOC_MOUSE
RN19A_MOUSE
RPGR1_MOUSE
RPOM_MOUSE
RRP5_MOUSE
RXFP1_RAT
S14L4_MOUSE
SCN3A_RAT
SMC4_MOUSE
SMUF1_MOUSE
SPT6H_MOUSE
SPT16_MOUSE
STK26_MOUSE
SURF6_MOUSE
SYT5_MOUSE
SYT14_MOUSE
TAF11_RAT
TBA1C_MOUSE
TDH_MOUSE
THA11_MOUSE
TKTL1_MOUSE
TLL1_MOUSE
TM45B_MOUSE
TM109_MOUSE
TMM94_MOUSE
TNNT2_MOUSE
TONSL_MOUSE
TOX3_MOUSE
TTC16_MOUSE
TUFT1_MOUSE
TZAP_MOUSE
UBAC2_MOUSE
UBL7_MOUSE
UN13B_RAT
WAC_MOUSE
WASC3_MOUSE
WLS_MOUSE
WWC2_MOUSE
ZAR1_MOUSE
ZC3HD_MOUSE
ZDBF2_MOUSE
ZHANG_MOUSE
ZN879_MOUSE
ZSC10_MOUSE

## Sheet: Additional Table 4
Volcano >/= 1.2 fold significant differences
Accession	Pvalue(-log10)	Pvalue(-log10) FDR Adjusted	FoldChange(log2)	Male1	Male2	Male3	Female1	Female2	Female3	ZeroFlagU	ZeroFlagT
CCDB1_MOUSE	7.39971	3.63292	15.4804	53496.2	38257.5	45394.2	0	0	0	FALSE	TRUE
PCLI1_MOUSE	6.37892	2.91317	-15.5296	0	0	0	33936.4	62105.5	45856.5	TRUE	FALSE
KANK4_MOUSE	5.09398	1.80432	-1.53939	46358.1	49996.1	45196.3	139293	140446	131712	FALSE	FALSE
DEN4B_MOUSE	3.91597	0.977674	12.4937	6185.71	1469.78	9643.46	0	0	0	FALSE	TRUE
ATX2L_MOUSE	3.91586	0.977674	-0.836947	377210	345928	380534	634132	648418	688902	FALSE	FALSE
PTGDS_RAT	3.85661	0.977674	-1.04982	316635	311713	296734	695437	592559	627181	FALSE	FALSE
PSME1_MOUSE	3.84268	0.977674	-0.326248	1.61988e+06	1.66637e+06	1.64678e+06	2.00586e+06	2.09397e+06	2.08495e+06	FALSE	FALSE
ELP3_MOUSE	3.84137	0.977674	0.441492	854643	794004	829973	610507	609579	605101	FALSE	FALSE
GDPP1_MOUSE	3.55901	0.812737	2.44394	12679	15370.7	12595.5	1908.62	2856.72	2702.02	FALSE	FALSE
CC124_MOUSE	3.52261	0.812737	-0.358037	399225	408832	403990	500572	516557	536329	FALSE	FALSE
MTNB_MOUSE	3.49411	0.812737	-0.330975	226299	214762	228075	277505	283567	280611	FALSE	FALSE
PITH1_MOUSE	3.45053	0.812737	-0.701675	5.62486e+06	5.14446e+06	5.32628e+06	8.17173e+06	9.19311e+06	8.81292e+06	FALSE	FALSE
DCPS_MOUSE	3.44742	0.812737	-0.35685	1.11193e+06	1.06245e+06	1.08616e+06	1.35539e+06	1.43887e+06	1.38127e+06	FALSE	FALSE
PBDC1_MOUSE	3.42095	0.812737	-0.997633	549083	608980	503327	1.05491e+06	1.16854e+06	1.09388e+06	FALSE	FALSE
MTX2_MOUSE	3.40343	0.812737	1.35294	1.25696e+06	1.2103e+06	1.23707e+06	432822	568668	448733	FALSE	FALSE
K0930_MOUSE	3.31571	0.761776	0.858161	146081	132847	133869	68730.1	79081.7	79909.2	FALSE	FALSE
CLAP2_MOUSE	3.28762	0.761776	-0.58439	3.01918e+06	2.68468e+06	2.91874e+06	4.45417e+06	4.30299e+06	4.17161e+06	FALSE	FALSE
FN3K_MOUSE	3.23348	0.761776	-0.311258	771595	764752	735014	962967	943367	911947	FALSE	FALSE
F16B2_MOUSE	3.22753	0.761776	-3.6358	212.876	229.658	286.998	4156.26	3085.9	1860.49	FALSE	FALSE
SRRM4_MOUSE	3.20422	0.759658	-0.368804	2.70568e+06	2.63646e+06	2.54546e+06	3.50078e+06	3.27463e+06	3.4097e+06	FALSE	FALSE
MAP6_MOUSE	3.13042	0.743361	-0.537282	6.73808e+07	6.30421e+07	6.38262e+07	1.00052e+08	8.89709e+07	9.28781e+07	FALSE	FALSE
ETHE1_MOUSE	3.12238	0.743361	-1.58271	61852.8	48331.7	43870.1	159692	165879	135878	FALSE	FALSE
ALBU_MOUSE	3.11221	0.743361	1.21418	1.35928e+07	1.76771e+07	1.49979e+07	6.01948e+06	6.86643e+06	7.05635e+06	FALSE	FALSE
REPS2_MOUSE	3.00505	0.653243	-1.36068	51224.4	53575.8	58352.1	162655	141524	114810	FALSE	FALSE
AB17C_MOUSE	2.97796	0.642543	-0.77271	36191	43676.3	37002.5	63613	68118.4	67939.9	FALSE	FALSE
SMAP_MOUSE	2.95625	0.636628	-1.01292	260547	283727	226811	569106	512522	474421	FALSE	FALSE
NIT2_MOUSE	2.9263	0.622793	-0.500223	3.08288e+06	3.27711e+06	2.97724e+06	4.34033e+06	4.19806e+06	4.6685e+06	FALSE	FALSE
PPT1_MOUSE	2.89011	0.622793	-0.699957	1.9876e+06	2.01528e+06	1.73501e+06	2.93578e+06	3.05826e+06	3.32691e+06	FALSE	FALSE
PA1B3_MOUSE	2.87626	0.622793	-0.453328	3.31071e+06	3.30544e+06	3.33446e+06	4.5373e+06	4.23676e+06	4.85027e+06	FALSE	FALSE
AUHM_MOUSE	2.87163	0.622793	-0.412176	9.71267e+06	9.94819e+06	9.05115e+06	1.24087e+07	1.24989e+07	1.32993e+07	FALSE	FALSE
HPLN2_MOUSE	2.86298	0.622793	-1.14657	1.01378e+06	907606	907776	1.99859e+06	1.80057e+06	2.46423e+06	FALSE	FALSE
JIP3_MOUSE	2.8581	0.622793	1.56149	33424.5	25984.8	34839	12530.9	10601.4	8797.1	FALSE	FALSE
MTPN_MOUSE	2.8381	0.61538	0.813731	323504	337100	283664	185385	161774	190041	FALSE	FALSE
K1107_MOUSE	2.77622	0.593346	-0.489649	89562.5	102476	95009.5	134801	128799	139446	FALSE	FALSE
LIMK1_MOUSE	2.76548	0.593346	-0.829653	472548	454896	577267	921416	850750	902096	FALSE	FALSE
RIR1_MOUSE	2.7645	0.593346	1.29099	174648	184929	234966	77522.9	71987.2	93460.5	FALSE	FALSE
NC2A_MOUSE	2.74769	0.593346	-0.493679	113318	111057	107261	142618	163819	160518	FALSE	FALSE
PLCX3_MOUSE	2.7474	0.593346	-0.807974	2.8443e+06	3.01373e+06	2.50111e+06	4.94668e+06	4.41355e+06	5.27454e+06	FALSE	FALSE
CNOT7_MOUSE	2.74735	0.593346	-0.606375	135793	130544	117508	181085	198183	205111	FALSE	FALSE
RM04_MOUSE	2.70727	0.563732	-0.568962	119010	123944	112477	159842	185392	182033	FALSE	FALSE
BAG6_MOUSE	2.69701	0.563689	0.733969	372825	335650	310152	217955	186216	208275	FALSE	FALSE
SMAG2_MOUSE	2.67483	0.551496	2.08014	49314.3	83728.5	70350.5	12223.9	17121.3	18753.4	FALSE	FALSE
SRSF7_MOUSE	2.663	0.549423	-0.281582	2.37642e+06	2.25529e+06	2.3132e+06	2.7059e+06	2.80301e+06	2.9328e+06	FALSE	FALSE
OSGEP_MOUSE	2.64442	0.540398	-0.456935	558501	524294	546543	696122	737318	803028	FALSE	FALSE
TALDO_MOUSE;TALDO_RAT	2.60985	0.517967	0.310401	2.94043e+06	2.83533e+06	2.8562e+06	2.27601e+06	2.45736e+06	2.2276e+06	FALSE	FALSE
RPAC1_MOUSE	2.59106	0.517967	1.9557	25757.1	41504.8	45894	8301.99	9611.52	11255.3	FALSE	FALSE
CB069_MOUSE	2.58341	0.517967	-0.278853	75379.7	77942.8	76739.5	91761.8	89402.9	97953.9	FALSE	FALSE
E41L5_MOUSE	2.57216	0.517967	-0.948992	30131	41700.5	32741.4	67182.5	70215.4	64485.4	FALSE	FALSE
RAB23_MOUSE	2.5542	0.517967	-0.29843	852034	806761	767189	1.01238e+06	989167	981945	FALSE	FALSE
IMA7_MOUSE	2.53167	0.517967	0.317152	1.08383e+06	1.18448e+06	1.09337e+06	888275	877194	932795	FALSE	FALSE
NEUFC_MOUSE	2.5285	0.517967	-0.56236	50811.2	54408.1	46530.8	70458.5	73062.3	80567.3	FALSE	FALSE
MINK1_MOUSE	2.51507	0.517967	1.18298	282138	230035	249238	128936	88155.8	118264	FALSE	FALSE
MECP2_MOUSE	2.51139	0.517967	-0.280899	1.59157e+06	1.53929e+06	1.5608e+06	1.85534e+06	1.83463e+06	2.01017e+06	FALSE	FALSE
DCXR_MOUSE	2.50046	0.517967	-0.496223	356781	357791	383510	497651	484439	566774	FALSE	FALSE
PUM1_MOUSE	2.49911	0.517967	-0.551377	125245	118357	126021	193771	186796	161111	FALSE	FALSE
WRIP1_MOUSE	2.48764	0.517967	1.07521	64675.6	93047.8	90002.8	39731.6	38704.3	39134	FALSE	FALSE
ALD2_MOUSE	2.48215	0.517967	-0.618383	305930	291504	287016	416054	429233	512481	FALSE	FALSE
CATZ_MOUSE	2.46992	0.517967	-0.355159	122759	115597	124289	158979	144765	160126	FALSE	FALSE
PALM3_MOUSE	2.46677	0.517967	-0.823679	176671	163261	201688	361238	286424	310961	FALSE	FALSE
PDCD6_MOUSE	2.45059	0.517967	0.871425	2.69615e+06	2.39685e+06	2.73683e+06	1.63088e+06	1.19801e+06	1.45094e+06	FALSE	FALSE
SYWM_MOUSE	2.43751	0.517967	1.88996	92834.2	51952.7	98025.9	22496.9	23202	19813.5	FALSE	FALSE
CH037_MOUSE	2.43101	0.517967	-1.1011	83418.2	108522	82097	163610	216666	207589	FALSE	FALSE
MRP1_MOUSE	2.42976	0.517967	-0.307384	72486.9	66119.8	65967.3	82293.7	83793.6	87066	FALSE	FALSE
CK068_MOUSE	2.42702	0.517967	-0.465674	810308	750570	728142	971326	1.06631e+06	1.12342e+06	FALSE	FALSE
DESI1_MOUSE	2.40887	0.517967	-3.9566	3745.7	11704.5	2942.04	63417.2	137115	85066.6	FALSE	FALSE
MBD3_MOUSE	2.38875	0.517967	-0.961595	38790.6	41739.8	30551.8	67654	67193.9	81483.2	FALSE	FALSE
TAM41_MOUSE	2.38822	0.517967	-0.50141	703212	645612	617809	848797	951221	983941	FALSE	FALSE
NET3_MOUSE	2.38768	0.517967	6.9941	135062	14254	125031	728.411	931.475	489.254	FALSE	FALSE
ECH1_MOUSE	2.38539	0.517967	-0.476188	509912	502228	486829	659718	653898	771545	FALSE	FALSE
SRPRB_MOUSE	2.3815	0.517967	-0.493773	743400	837229	700259	1.02071e+06	1.11528e+06	1.07578e+06	FALSE	FALSE
G3P_MOUSE;G3PT_MOUSE;G3PT_RAT	2.37923	0.517967	-0.356809	4.81215e+08	4.76414e+08	4.61441e+08	5.67019e+08	5.99777e+08	6.50453e+08	FALSE	FALSE
TTC19_MOUSE	2.3747	0.517967	-0.333471	225747	204693	213642	280585	256254	274730	FALSE	FALSE
NCBP1_MOUSE	2.3691	0.517967	-0.876093	154635	113222	149559	257517	270166	238443	FALSE	FALSE
FETA_RAT	2.36894	0.517967	1.90987	347790	369742	292246	54842.8	107331	106542	FALSE	FALSE
TTC9B_MOUSE	2.3681	0.517967	-0.838066	113922	119978	107700	208571	169405	232689	FALSE	FALSE
NEUG_MOUSE	2.35767	0.517967	0.454689	2.24764e+06	2.17546e+06	2.10148e+06	1.73421e+06	1.45306e+06	1.57349e+06	FALSE	FALSE
NDUA5_MOUSE	2.35737	0.517967	14.3446	60108.8	521.605	1781.08	0	0	0	FALSE	TRUE
DLGP4_MOUSE;DLGP2_RAT	2.35711	0.517967	-0.631082	466757	429759	512658	728471	796583	657373	FALSE	FALSE
DNJC9_MOUSE	2.35533	0.517967	-0.621061	35521.8	40137.1	36897.3	63612.7	58498.8	51002.1	FALSE	FALSE
RENR_MOUSE	2.33683	0.504959	-0.305924	363443	394755	376309	448441	460965	493084	FALSE	FALSE
ESTD_MOUSE	2.32847	0.504959	-0.50301	3.80339e+06	3.32841e+06	3.68349e+06	4.77572e+06	4.9796e+06	5.57175e+06	FALSE	FALSE
DAB1_MOUSE	2.32338	0.504959	-1.05269	34839.7	42536.1	52836.2	94151.3	81107.9	94854.4	FALSE	FALSE
RABL6_MOUSE	2.32025	0.504959	-0.398471	3.08663e+06	3.0234e+06	3.08248e+06	4.41073e+06	3.95864e+06	3.74739e+06	FALSE	FALSE
CLIC1_MOUSE	2.3137	0.504959	-0.59277	775969	767339	834448	1.04147e+06	1.25403e+06	1.29049e+06	FALSE	FALSE
LRFN4_MOUSE	2.30813	0.504959	-1.06215	13362.9	10768	14741.1	28823.9	30009.3	22336.1	FALSE	FALSE
DPYL4_MOUSE	2.30796	0.504959	0.291931	1.75291e+07	1.70762e+07	1.5949e+07	1.43701e+07	1.35762e+07	1.33468e+07	FALSE	FALSE
SCOT1_MOUSE	2.29742	0.503365	0.61335	9.54205e+06	1.1439e+07	8.91948e+06	6.60352e+06	6.57252e+06	6.36927e+06	FALSE	FALSE
SHAN2_RAT	2.29394	0.503365	-0.465775	107504	99206.7	102822	146553	152682	128249	FALSE	FALSE
ARHG6_MOUSE	2.27398	0.495482	-0.381591	55956.4	52910	55728.9	77834.6	69193	67404.4	FALSE	FALSE
MCATL_MOUSE	2.27161	0.495482	-0.563848	104690	91691.6	111171	139885	152427	162316	FALSE	FALSE
PP2AA_MOUSE;PP2AA_RAT	2.26725	0.495482	-0.441919	8.15682e+06	7.36897e+06	7.50695e+06	9.72239e+06	1.02017e+07	1.13638e+07	FALSE	FALSE
R7BP_MOUSE	2.25971	0.495482	-0.879324	59126.8	44011.6	56420.9	86530.1	108403	98581.4	FALSE	FALSE
CCS_MOUSE	2.24973	0.495482	-0.460949	244203	243441	257476	334853	312663	378104	FALSE	FALSE
HTRA2_MOUSE;HTRA4_MOUSE	2.24601	0.495482	-0.34043	1.04864e+06	1.00037e+06	994867	1.27674e+06	1.19945e+06	1.37776e+06	FALSE	FALSE
SNAA_MOUSE	2.24592	0.495482	-0.332828	1.09918e+07	1.09321e+07	1.12133e+07	1.34298e+07	1.32191e+07	1.50867e+07	FALSE	FALSE
RM46_MOUSE	2.24376	0.495482	-0.275752	210687	214362	210260	248964	245821	274337	FALSE	FALSE
RASL2_MOUSE	2.24242	0.495482	-0.694444	4.001e+06	3.61898e+06	3.21824e+06	5.15683e+06	6.00002e+06	6.38222e+06	FALSE	FALSE
PBLD1_MOUSE	2.24108	0.495482	-0.994711	35529.5	43574.6	33950.7	88074.5	75198.2	62012.5	FALSE	FALSE
PP2AB_MOUSE	2.23672	0.495242	-0.446234	4.87394e+06	4.3762e+06	4.50368e+06	5.79309e+06	6.13405e+06	6.81216e+06	FALSE	FALSE
AKCL2_MOUSE	2.2211	0.487355	-0.500565	29842.1	24638.1	26434.5	36700.7	36966.1	40809.9	FALSE	FALSE
RAB30_MOUSE	2.22072	0.487355	-0.548486	179073	163658	192998	241660	288621	253251	FALSE	FALSE
PSME2_MOUSE	2.20802	0.485609	-0.491008	612990	653010	627179	783186	922598	954940	FALSE	FALSE
MARE2_MOUSE;MARE2_RAT	2.20709	0.485609	-0.280185	6.83883e+06	6.91366e+06	6.78577e+06	7.90588e+06	8.12431e+06	8.91046e+06	FALSE	FALSE
ANXA4_MOUSE	2.20668	0.485609	-0.720259	210504	165867	176254	266772	321514	322155	FALSE	FALSE
PNPT1_MOUSE	2.19895	0.485609	-0.797624	238368	165374	209824	351590	352608	362327	FALSE	FALSE
GA2L1_MOUSE	2.19539	0.485609	-0.714949	88652.8	99110	80846.7	139354	132651	168899	FALSE	FALSE
SIKE1_MOUSE	2.19134	0.485609	2.86958	47868.2	35953.9	51781.8	10330.2	2666.61	5554.8	FALSE	FALSE
AT1A4_MOUSE	2.17705	0.485609	-0.964483	1.26246e+07	9.12965e+06	1.31893e+07	2.53415e+07	2.05489e+07	2.22972e+07	FALSE	FALSE
KIF3A_MOUSE;KI16B_MOUSE;KIF4_MOUSE	2.17499	0.485609	0.317417	2.39676e+06	2.125e+06	2.11964e+06	1.79062e+06	1.73447e+06	1.80467e+06	FALSE	FALSE
CNTP2_MOUSE	2.17408	0.485609	-0.860084	1.18137e+06	1.01419e+06	1.17549e+06	2.04467e+06	2.39409e+06	1.68018e+06	FALSE	FALSE
PLPL8_MOUSE	2.17399	0.485609	-0.359389	358843	361814	415436	488971	475668	492835	FALSE	FALSE
RHG23_MOUSE;RHG21_MOUSE	2.17175	0.485609	-0.404453	856331	783588	881876	1.0232e+06	1.15287e+06	1.16175e+06	FALSE	FALSE
HDAC5_MOUSE	2.16961	0.485609	-0.661972	229679	204663	234170	395453	359168	303130	FALSE	FALSE
MYPT1_MOUSE	2.15159	0.475869	-0.69911	559566	551605	485682	1.0091e+06	815498	767895	FALSE	FALSE
MGLL_MOUSE	2.14063	0.475869	-0.527632	423721	373091	389766	641958	539762	528806	FALSE	FALSE
NU153_RAT	2.13651	0.475869	-0.809027	28283.8	31393	23221	53308.9	42265.4	49667.4	FALSE	FALSE
SC31A_MOUSE	2.13535	0.475869	-0.435399	1.45003e+06	1.23316e+06	1.43354e+06	1.84484e+06	1.95811e+06	1.76403e+06	FALSE	FALSE
MAGI3_MOUSE;MAGI3_RAT	2.13367	0.475869	-0.369322	370918	313074	356039	447000	452862	443594	FALSE	FALSE
CNTN6_RAT	2.12864	0.475869	2.74534	63050	147951	59850.6	18748.6	8520.58	13121	FALSE	FALSE
FIS1_MOUSE	2.12478	0.475869	1.95197	3.13917e+06	1.97942e+06	4.15055e+06	1.00557e+06	586508	803653	FALSE	FALSE
INADL_MOUSE	2.12358	0.475869	-0.846768	39567.7	35677.2	26883.1	64212.7	57551.8	61911.9	FALSE	FALSE
PPAL_MOUSE	2.11828	0.475869	-0.473231	36821.8	34615.7	40685	56178.6	51592.7	47879.9	FALSE	FALSE
UQCC1_MOUSE	2.11748	0.475869	-1.55238	583557	313715	590407	1.42048e+06	1.66939e+06	1.27351e+06	FALSE	FALSE
PRPK_MOUSE	2.11254	0.475869	-0.612548	140091	133090	118261	197259	224406	176836	FALSE	FALSE
NDKB_MOUSE	2.11157	0.475869	0.465469	7.94086e+07	7.49249e+07	8.66691e+07	5.83807e+07	5.31058e+07	6.30561e+07	FALSE	FALSE
DDAH1_MOUSE	2.10122	0.4715	-0.441743	8.81148e+06	9.81825e+06	9.27865e+06	1.13406e+07	1.3483e+07	1.30828e+07	FALSE	FALSE
DLGP2_MOUSE	2.09785	0.4715	-0.375893	160008	148352	149764	217220	188873	188391	FALSE	FALSE
U119A_MOUSE;U119B_MOUSE	2.0915	0.4715	-0.433358	325628	325986	292305	398384	409014	467245	FALSE	FALSE
BACD1_MOUSE;BACD2_MOUSE	2.08739	0.4715	-0.422647	1.18589e+06	1.2843e+06	1.30696e+06	1.56372e+06	1.63977e+06	1.85935e+06	FALSE	FALSE
NAA11_MOUSE	2.08649	0.4715	-0.676539	96360.7	107826	81526.4	146955	168342	141361	FALSE	FALSE
IAH1_MOUSE	2.086	0.4715	-0.286471	1.54407e+06	1.63138e+06	1.46154e+06	1.90527e+06	1.95644e+06	1.79382e+06	FALSE	FALSE
XRP2_MOUSE	2.07667	0.465223	-0.677964	152197	152863	151053	225711	290650	213367	FALSE	FALSE
BEGIN_MOUSE	2.06829	0.464777	-0.900214	50675.1	33055.6	46013.7	84798.4	76532.5	80819.4	FALSE	FALSE
MTAP2_MOUSE	2.05983	0.464777	0.545076	2.17674e+07	1.72401e+07	2.02671e+07	12716665	1.44433e+07	1.34643e+07	FALSE	FALSE
ERGI1_MOUSE	2.05661	0.464777	-0.857949	855863	1.09093e+06	817542	1.49973e+06	1.54133e+06	1.96918e+06	FALSE	FALSE
SCG3_MOUSE	2.05641	0.464777	0.460765	178776	194211	191792	142560	147345	120463	FALSE	FALSE
EF1G_MOUSE	2.05459	0.464777	0.331353	7.45018e+06	7.22035e+06	6.93094e+06	5.2371e+06	5.91694e+06	6.01462e+06	FALSE	FALSE
MRE11_MOUSE	2.05351	0.464777	-0.692261	55350.5	42413.9	39876.5	73341.2	77100.5	71962.3	FALSE	FALSE
SRCN1_MOUSE	2.05258	0.464777	-0.515986	4.05851e+06	3.66556e+06	4.07686e+06	5.91959e+06	6.04211e+06	4.91328e+06	FALSE	FALSE
MIC27_MOUSE	2.04749	0.463821	-0.481571	436486	349145	411588	533838	580466	557330	FALSE	FALSE
VAC14_MOUSE	2.04591	0.463821	0.717377	1.46204e+06	1.7696e+06	1.71102e+06	1.03657e+06	840402	1.12917e+06	FALSE	FALSE
UB2V1_MOUSE	2.03853	0.4625	0.473175	6.65879e+06	7.23494e+06	7.49035e+06	4.71891e+06	4.92489e+06	5.76081e+06	FALSE	FALSE
NUP35_MOUSE	2.03739	0.4625	-0.448286	217818	246639	222815	293394	297747	346586	FALSE	FALSE
PLCD1_MOUSE	2.03325	0.4625	-0.267372	1.3581e+06	1.46029e+06	1.46535e+06	1.7575e+06	1.78219e+06	1.61627e+06	FALSE	FALSE
STA10_MOUSE	2.03015	0.4625	-0.414955	1.102e+06	927606	956462	1.28321e+06	1.28647e+06	1.41152e+06	FALSE	FALSE
RBM27_MOUSE	2.02789	0.4625	-1.28271	25472.2	16851.2	33053.7	59966.1	63875.9	59550.7	FALSE	FALSE
MINK1_RAT	2.02307	0.461243	-0.449125	620555	665914	674377	971224	914186	791561	FALSE	FALSE
RANB9_MOUSE	2.01695	0.459682	1.30607	350185	547481	473349	166709	148201	239554	FALSE	FALSE
SIR5_MOUSE	2.01401	0.459412	-0.408088	1.19435e+06	1.2144e+06	1.06345e+06	1.61832e+06	1.4042e+06	1.58483e+06	FALSE	FALSE
GPM6A_MOUSE;GPM6A_RAT	2.00725	0.455881	-0.477908	1.78462e+07	1.47093e+07	1.65777e+07	2.15291e+07	2.20374e+07	2.48625e+07	FALSE	FALSE
ICAL_MOUSE	2.00414	0.455881	-0.968619	525381	727118	449836	1.14734e+06	1.00786e+06	1.17621e+06	FALSE	FALSE
GMPR1_MOUSE	2.00256	0.455881	-1.22161	460810	245850	307072	756180	740248	867661	FALSE	FALSE
MRP_MOUSE	1.99947	0.455402	0.792242	621542	662089	582905	372894	284090	420839	FALSE	FALSE
RHG06_MOUSE	1.99401	0.454401	-0.632388	14742	17194.5	19779.1	28048.5	24310	27809.1	FALSE	FALSE
CTND2_MOUSE;CTND2_RAT	1.99102	0.454401	-0.344293	4.32128e+06	4.0415e+06	4.09294e+06	5.77932e+06	5.06368e+06	4.96988e+06	FALSE	FALSE
EPDR1_MOUSE	1.99074	0.454401	-0.2774	2.28504e+06	2.39873e+06	2.15281e+06	2.60918e+06	2.84702e+06	2.82979e+06	FALSE	FALSE
RGS17_MOUSE	1.98666	0.45311	-0.45264	102080	102809	104632	123759	144194	155641	FALSE	FALSE
NFM_MOUSE	1.98196	0.45311	-0.579305	6.83557e+07	5.48601e+07	7.02512e+07	8.83019e+07	1.00242e+08	1.00521e+08	FALSE	FALSE
RBL2A_MOUSE	1.98162	0.45311	-0.634299	136971	129224	151859	222585	242978	183335	FALSE	FALSE
ANM9_MOUSE	1.97512	0.45311	-1.97899	1569.8	2607.47	2179.62	12138.7	7884.52	5045.46	FALSE	FALSE
SYT2_MOUSE;SYT2_RAT	1.97343	0.45311	0.407842	1.97557e+07	2.00375e+07	1.68423e+07	1.45358e+07	1.34702e+07	1.46829e+07	FALSE	FALSE
1433E_MOUSE;1433E_RAT	1.97052	0.45311	-0.409817	7.02309e+07	6.79746e+07	6.90627e+07	8.22818e+07	9.13007e+07	101776876	FALSE	FALSE
NUFP2_MOUSE	1.97006	0.45311	-0.671557	170231	123081	129256	219005	216225	237834	FALSE	FALSE
UD3A1_MOUSE	1.9686	0.45311	-1.20182	73344.2	42359.6	48161.4	132994	139876	104072	FALSE	FALSE
PMVK_MOUSE	1.9657	0.45311	-2.58421	72138.2	19933.5	18382.1	238861	215022	208508	FALSE	FALSE
PPCS_MOUSE	1.96462	0.45311	-0.532628	310197	242258	297896	433589	387536	408962	FALSE	FALSE
FA98A_MOUSE	1.95821	0.452662	0.434776	343478	314306	293609	258474	224053	221321	FALSE	FALSE
VCIP1_MOUSE	1.95665	0.452662	-0.537973	1.77075e+06	1.46057e+06	1.58613e+06	2.60162e+06	2.28918e+06	2.10379e+06	FALSE	FALSE
STIM1_MOUSE	1.95169	0.452662	-0.466631	350006	277212	338000	434245	446427	453142	FALSE	FALSE
CFA36_MOUSE	1.95067	0.452662	0.437152	123029	146143	119558	92152.9	94841.7	100117	FALSE	FALSE
RED1_MOUSE	1.94977	0.452662	0.364801	182285	172238	203210	145592	136678	150851	FALSE	FALSE
NUMBL_MOUSE	1.94761	0.452662	-0.641174	337337	418989	475185	660468	616266	643930	FALSE	FALSE
PPP5_MOUSE	1.9399	0.452518	0.335646	3.20304e+06	3.74749e+06	3.22862e+06	2.65034e+06	2.74077e+06	2.67514e+06	FALSE	FALSE
NMRL1_MOUSE	1.93634	0.452518	-0.41804	991763	943490	960428	1.22355e+06	1.18964e+06	1.45576e+06	FALSE	FALSE
THTM_MOUSE	1.93582	0.452518	-0.621325	1.34448e+06	1.31804e+06	1.21673e+06	1.77895e+06	1.82409e+06	2.36435e+06	FALSE	FALSE
ASAP2_MOUSE	1.93572	0.452518	-0.58144	627328	765264	622970	1.13292e+06	933329	949721	FALSE	FALSE
BACE1_MOUSE	1.93211	0.452518	0.400873	154502	156747	160285	116391	107402	133345	FALSE	FALSE
ARPC2_MOUSE	1.92625	0.452518	-0.506886	4.38729e+06	3.55747e+06	3.81354e+06	5.09729e+06	5.51734e+06	6.09369e+06	FALSE	FALSE
FA49B_MOUSE	1.91993	0.452518	-0.875832	5.25943e+06	7.17088e+06	4.57428e+06	9.66833e+06	1.00583e+07	1.14779e+07	FALSE	FALSE
TAOK2_MOUSE	1.91891	0.452518	-0.762677	248740	175068	233734	412141	366693	336778	FALSE	FALSE
SEC13_MOUSE	1.91537	0.452518	-0.368935	294814	242504	272844	336979	357347	351916	FALSE	FALSE
AMPE_MOUSE	1.91392	0.452518	-2.40274	5326.03	7345.46	9109.32	28336.8	64920.2	21934.5	FALSE	FALSE
ALD1_MOUSE	1.91292	0.452518	-0.567798	386838	333374	384550	501420	505030	631095	FALSE	FALSE
YLPM1_RAT	1.91129	0.452518	-0.454243	93766.5	88997.7	85925.4	132605	106961	128557	FALSE	FALSE
GOGA5_MOUSE	1.91055	0.452518	0.523239	116958	148397	120189	90024.4	83907.9	94331.5	FALSE	FALSE
TF2B_MOUSE	1.90841	0.452518	-0.454782	67736.7	63463	58125.5	88299.1	93884.9	77301.3	FALSE	FALSE
RC3H1_MOUSE	1.88828	0.439556	-0.725585	38347	37597.4	41875.7	77560.9	52932	64333	FALSE	FALSE
GSTM3_MOUSE	1.87849	0.439401	-0.489524	1.25224e+07	1.39608e+07	1.21842e+07	1.83055e+07	2.0072e+07	1.59108e+07	FALSE	FALSE
PANX2_MOUSE	1.87784	0.439401	-0.676168	27428	37480.1	38837.7	54087.7	53720.8	57967.7	FALSE	FALSE
BAP31_MOUSE	1.87565	0.439401	-0.792717	1.20135e+06	947359	1.03419e+06	1.46526e+06	2.04536e+06	2.00322e+06	FALSE	FALSE
MDHC_MOUSE;MDHC_RAT	1.87565	0.439401	-0.414793	1.59177e+08	1.52572e+08	1.44769e+08	1.8637e+08	1.94313e+08	2.27903e+08	FALSE	FALSE
QRIC1_MOUSE	1.87488	0.439401	-1.03938	57757	67488.6	43728.1	134001	121765	91535.7	FALSE	FALSE
NSF1C_MOUSE	1.86074	0.430507	0.295781	6.42503e+06	7.20419e+06	7.01166e+06	5.3512e+06	5.47102e+06	5.99249e+06	FALSE	FALSE
PHYD1_MOUSE	1.86004	0.430507	-0.381885	315012	308287	313132	436348	358294	425569	FALSE	FALSE
RRAS2_MOUSE	1.85884	0.430507	0.432623	4.73523e+06	4.35477e+06	5.22775e+06	3.456e+06	3.28489e+06	3.86733e+06	FALSE	FALSE
P85A_MOUSE;P55G_MOUSE	1.85595	0.430045	-0.9882	96788.2	57063.2	85546.3	164094	169394	141411	FALSE	FALSE
ELP1_MOUSE	1.8541	0.430045	-1.2191	535993	308619	567990	1.02484e+06	1.27157e+06	992145	FALSE	FALSE
SAP3_MOUSE	1.84762	0.430045	-0.79887	259259	350346	346239	617743	584858	460317	FALSE	FALSE
UBC9_MOUSE	1.84084	0.430045	0.911504	673856	567899	739576	443751	279360	330224	FALSE	FALSE
ESRP1_MOUSE	1.83936	0.430045	0.774125	351297	512140	361863	239038	253974	223473	FALSE	FALSE
E41L1_RAT	1.83923	0.430045	-0.846746	1.30757e+06	995820	953967	1.64692e+06	1.87533e+06	2.33592e+06	FALSE	FALSE
LYSM1_MOUSE	1.83803	0.430045	-0.708985	205310	303564	267342	429219	447990	391637	FALSE	FALSE
HMCS1_MOUSE	1.83118	0.430045	0.545809	1.05826e+06	1.09993e+06	874786	697078	621029	759501	FALSE	FALSE
HEM4_MOUSE	1.83105	0.430045	2.93394	98560.9	158621	168382	38680.2	6449.93	10555	FALSE	FALSE
CELR2_RAT	1.82946	0.430045	-0.753617	73168.6	57453.3	60974.7	130799	96946.2	95291.6	FALSE	FALSE
CAD11_MOUSE;CAD12_MOUSE;CAD24_MOUSE	1.82357	0.430045	-0.393018	88076.9	96003.7	85084.6	128217	119297	105938	FALSE	FALSE
RIPL1_MOUSE	1.8201	0.430045	0.41757	222474	244390	233754	154117	176596	193828	FALSE	FALSE
PDK1_MOUSE	1.81586	0.430045	-0.279886	530438	476143	467495	628773	586166	574736	FALSE	FALSE
RPR1B_MOUSE	1.81124	0.430045	-0.386237	344769	298857	280472	381490	409006	417282	FALSE	FALSE
PDLI3_MOUSE	1.80993	0.430045	-1.46907	30836.7	35475.3	30456.4	65968.6	134278	67654.8	FALSE	FALSE
T22D4_MOUSE	1.80797	0.430045	0.627155	373489	374441	401116	290133	200635	253183	FALSE	FALSE
KGP2_MOUSE	1.80329	0.430045	1.10382	94028.9	146155	90655.2	43721.4	47910.2	62301.1	FALSE	FALSE
MSTO1_MOUSE	1.80073	0.430045	0.657997	253325	281831	242753	158647	136762	197595	FALSE	FALSE
SQOR_MOUSE	1.79997	0.430045	-0.841608	116818	99738.5	130342	209138	248364	164160	FALSE	FALSE
CUL5_MOUSE	1.79412	0.430045	-0.541103	1.02289e+06	811300	783013	1.36912e+06	1.26624e+06	1.17289e+06	FALSE	FALSE
ERGI2_MOUSE	1.79323	0.430045	1.946	58152.2	58634.4	74706.8	29116.3	11777.1	8803.71	FALSE	FALSE
ST4A1_MOUSE	1.79146	0.430045	-0.391902	1.44324e+06	1.41982e+06	1.25274e+06	1.72922e+06	1.68535e+06	1.98587e+06	FALSE	FALSE
BMPR2_MOUSE	1.78951	0.430045	0.973308	653687	945375	842163	395415	329948	518040	FALSE	FALSE
PLPP_MOUSE	1.78882	0.430045	-0.309267	6.85713e+06	6.50884e+06	5.97355e+06	7.83813e+06	7.57937e+06	8.54569e+06	FALSE	FALSE
VDAC1_MOUSE;VDAC1_RAT	1.78752	0.430045	-0.395641	8.04765e+07	7.29456e+07	7.70668e+07	9.27084e+07	9.68823e+07	1.13624e+08	FALSE	FALSE
ALDR_MOUSE;AK1CD_MOUSE	1.78495	0.430045	-0.263877	8.69477e+06	7.97521e+06	8.28092e+06	9.54816e+06	1.07628e+07	9.64759e+06	FALSE	FALSE
MBNL1_MOUSE	1.78342	0.430045	0.395021	135067	160132	150025	122650	103985	111947	FALSE	FALSE
CPSF5_MOUSE	1.78301	0.430045	-0.784818	1.29727e+06	1.57917e+06	1.58952e+06	2.0285e+06	3.01902e+06	2.64677e+06	FALSE	FALSE
ARFRP_MOUSE	1.78155	0.430045	-1.02817	123794	99020.8	87949.5	158691	262237	212861	FALSE	FALSE
GBB2_MOUSE	1.78143	0.430045	-0.568747	1.4687e+07	1.075e+07	1.20261e+07	1.70747e+07	1.86848e+07	1.98071e+07	FALSE	FALSE
HS90A_MOUSE;TRAP1_RAT	1.7804	0.430045	0.374749	1.50045e+08	1.63163e+08	1.41872e+08	1.07892e+08	1.14445e+08	1.28639e+08	FALSE	FALSE
P5CR3_MOUSE	1.77815	0.430045	-0.690196	1.11254e+06	886677	788020	1.44992e+06	1.69969e+06	1.3476e+06	FALSE	FALSE
IL21R_MOUSE	1.77811	0.430045	-0.828386	799159	506647	699881	1.18249e+06	1.06404e+06	1.31497e+06	FALSE	FALSE
GBB1_MOUSE;GBB1_RAT	1.77714	0.430045	-0.561288	2.77477e+07	2.03747e+07	2.27059e+07	3.21796e+07	3.50868e+07	3.72469e+07	FALSE	FALSE
CACB1_MOUSE;CACB2_MOUSE	1.77648	0.430045	-0.388354	264143	248975	301057	379513	331317	354843	FALSE	FALSE
DJB11_MOUSE	1.77546	0.430045	0.36463	539909	563577	571117	385252	477986	437373	FALSE	FALSE
PLCL1_MOUSE	1.77463	0.430045	-0.353516	4.08384e+06	3.78379e+06	3.73363e+06	5.34682e+06	5.03566e+06	4.44011e+06	FALSE	FALSE
MYO19_MOUSE	1.77319	0.430045	0.521962	9.81184e+06	7.57972e+06	9.6626e+06	6.56008e+06	6.41207e+06	5.86902e+06	FALSE	FALSE
UMPS_MOUSE	1.77248	0.430045	-0.375198	188671	167842	151770	210797	227806	220650	FALSE	FALSE
MTCH2_MOUSE	1.76929	0.430045	-0.548518	5.92948e+06	4.62847e+06	5.56307e+06	7.75136e+06	8.76217e+06	7.06478e+06	FALSE	FALSE
MYO6_MOUSE	1.76891	0.430045	-1.75943	662817	258350	690935	1.62685e+06	2.11756e+06	1.71359e+06	FALSE	FALSE
PTN23_MOUSE	1.76807	0.430045	0.559598	506252	388935	473976	281737	343280	303948	FALSE	FALSE
MILK1_MOUSE	1.76805	0.430045	-0.459255	129326	120877	101761	174426	154193	155273	FALSE	FALSE
ANXA3_MOUSE	1.76595	0.430045	-0.264793	3.78472e+06	3.50395e+06	3.53139e+06	4.00469e+06	4.4338e+06	4.56142e+06	FALSE	FALSE
PECR_MOUSE	1.76281	0.430045	-0.550974	965493	801247	1.06819e+06	1.28161e+06	1.3487e+06	1.52308e+06	FALSE	FALSE
ISOC1_MOUSE;ISOC1_RAT	1.75813	0.430045	-0.441823	2.67038e+06	2.32523e+06	2.73086e+06	3.14167e+06	3.48862e+06	3.86472e+06	FALSE	FALSE
ATX2_MOUSE	1.75608	0.430045	-0.464622	504850	460299	505033	702075	745853	580860	FALSE	FALSE
RB27B_MOUSE;RB27A_MOUSE	1.75555	0.430045	-0.323465	2.29297e+06	2.47164e+06	2.48659e+06	2.77553e+06	3.30649e+06	2.99164e+06	FALSE	FALSE
ARBK1_MOUSE	1.7554	0.430045	-0.312987	950228	1.09752e+06	917806	1.19586e+06	1.23798e+06	1.25021e+06	FALSE	FALSE
VISL1_MOUSE	1.75491	0.430045	0.453264	4.57416e+07	5.35707e+07	4.89813e+07	4.10519e+07	3.30904e+07	3.41697e+07	FALSE	FALSE
GTF2I_MOUSE;GT2D2_MOUSE	1.75489	0.430045	-0.464129	601632	596485	545081	820153	892798	691763	FALSE	FALSE
SNP23_MOUSE	1.75359	0.430045	-0.647188	421090	396934	351546	518364	729406	583911	FALSE	FALSE
GFAP_RAT	1.75059	0.430045	0.338761	145248	167446	154356	133676	120577	115052	FALSE	FALSE
RIPR1_RAT	1.74933	0.430045	-0.564343	217639	234813	179255	349589	284395	300131	FALSE	FALSE
NIT1_MOUSE	1.74812	0.430045	-0.387028	662826	559176	559320	823242	788339	717849	FALSE	FALSE
LCA5_MOUSE	1.74642	0.429886	-2.20852	304144	155648	151349	1.54323e+06	546827	734644	FALSE	FALSE
NUMB_MOUSE	1.74108	0.427611	-0.607421	79169.5	116301	100799	149932	149926	151520	FALSE	FALSE
HDAC4_MOUSE	1.73904	0.427097	-0.799568	183470	123507	126910	289261	235851	230104	FALSE	FALSE
RBM22_MOUSE	1.73388	0.423983	-5.12006	513.419	118.514	792.719	4268.94	38230.2	7147.16	FALSE	FALSE
GSLG1_MOUSE	1.73215	0.423983	-1.72966	55276.4	29216.3	61348.3	148648	226040	109000	FALSE	FALSE
GIT2_MOUSE	1.73138	0.423983	-0.694542	28720.7	25700.9	19237.1	42689.3	36271.1	40248.5	FALSE	FALSE
NCBP3_MOUSE	1.72662	0.422983	-1.78699	17282.6	5672.02	13479.8	49416.5	37340.2	38983.2	FALSE	FALSE
LIPA3_MOUSE	1.72615	0.422983	-1.15581	1.00017e+06	605318	1.12022e+06	1.74783e+06	2.45391e+06	1.87141e+06	FALSE	FALSE
SYVC_RAT	1.72587	0.422983	1.80313	1.18008e+06	2.17295e+06	984434	549512	262647	430754	FALSE	FALSE
TAB1_MOUSE	1.72261	0.422687	-0.423053	78204.3	89426.4	102640	120265	121661	120444	FALSE	FALSE
RAB5B_MOUSE	1.7226	0.422687	-0.514424	8.73663e+06	7.13441e+06	7.89223e+06	9.75809e+06	1.23508e+07	1.18351e+07	FALSE	FALSE
WDR82_MOUSE	1.71667	0.419666	-0.520695	387055	328104	397079	532542	464454	598673	FALSE	FALSE
SYNM_MOUSE	1.71561	0.419666	1.05184	39330.8	40942.4	54346.4	16671.2	29203.5	19058	FALSE	FALSE
ATAT_MOUSE	1.71431	0.419666	-0.597386	201913	219827	193809	278347	277479	375485	FALSE	FALSE
5NTD_MOUSE	1.71369	0.419666	-0.491631	847891	1.05094e+06	1.13173e+06	1.33679e+06	1.45084e+06	1.47343e+06	FALSE	FALSE
IFT25_MOUSE	1.7109	0.41833	-0.535173	104032	106899	141090	162151	171122	176848	FALSE	FALSE
RPC8_MOUSE	1.70902	0.417905	-8.13622	0	842.111	0	18484.6	105973	113310	TRUE	FALSE
RALB_MOUSE	1.7059	0.416233	-0.38187	1.29083e+06	1.0807e+06	1.24099e+06	1.45453e+06	1.70131e+06	1.55138e+06	FALSE	FALSE
RLA2_MOUSE	1.70026	0.414845	1.34421	1.95903e+07	2.16458e+07	2.12982e+07	4.69095e+06	8.3789e+06	1.15604e+07	FALSE	FALSE
HMGB1_MOUSE	1.69912	0.414845	-0.594173	6.07349e+06	6.08628e+06	6.61294e+06	8.4163e+06	8.43302e+06	1.14901e+07	FALSE	FALSE
CA050_MOUSE	1.69886	0.414845	0.344671	229428	246946	213350	174121	198658	170370	FALSE	FALSE
ANK1_MOUSE	1.69876	0.414845	1.11044	190116	140501	152711	49123.5	85242.8	89486.1	FALSE	FALSE
FCGR1_MOUSE	1.69502	0.413074	-0.802594	148047	172866	138554	335042	251322	215057	FALSE	FALSE
R3HD2_MOUSE	1.69414	0.413074	-0.431843	104852	127956	114722	145486	149316	174001	FALSE	FALSE
DJC10_MOUSE	1.69233	0.412844	0.477225	380350	463495	481831	349056	302140	301114	FALSE	FALSE
LDHB_MOUSE	1.69046	0.412844	-0.268921	9.21067e+07	8.75832e+07	8.693e+07	9.90683e+07	1.06022e+08	1.16162e+08	FALSE	FALSE
UCHL1_MOUSE	1.6774	0.412844	-0.346051	1.01834e+08	1.04221e+08	8.83367e+07	1.17136e+08	1.34212e+08	122846684	FALSE	FALSE
MYORG_MOUSE	1.67565	0.412844	1.4604	94793.2	133818	103301	25163.2	32397.5	63051.4	FALSE	FALSE
ST1D1_MOUSE	1.67484	0.412844	-0.55273	257930	202270	233305	340560	382632	294084	FALSE	FALSE
RAC3_MOUSE	1.67398	0.412844	0.319397	2.89857e+06	2.78751e+06	3.34986e+06	2.44327e+06	2.47832e+06	2.31986e+06	FALSE	FALSE
NCAM1_MOUSE	1.67375	0.412844	-0.320591	8.02972e+07	7.33566e+07	7.8832e+07	103066437	1.00388e+08	8.68837e+07	FALSE	FALSE
RS27A_MOUSE;RS27A_RAT	1.67334	0.412844	-0.366397	3.76307e+07	4.14091e+07	3.43441e+07	53032236	4.67834e+07	4.63509e+07	FALSE	FALSE
XPO5_MOUSE	1.67142	0.412844	-0.33064	253057	238143	236484	339138	297206	278771	FALSE	FALSE
APC_RAT	1.67075	0.412844	-0.654275	162297	139205	121400	186911	223421	255243	FALSE	FALSE
SRSF1_MOUSE	1.66961	0.412844	-0.400728	6.03666e+06	5.65424e+06	5.08315e+06	6.61058e+06	7.52584e+06	8.00823e+06	FALSE	FALSE
NDUA9_MOUSE;IL19_MOUSE	1.6675	0.412844	-0.441498	1.58083e+07	1.31655e+07	1.32717e+07	1.75295e+07	1.85103e+07	2.13301e+07	FALSE	FALSE
LIPA4_RAT	1.66706	0.412844	1.37905	217021	394624	196961	107838	80065.6	122980	FALSE	FALSE
ROA1_MOUSE	1.66645	0.412844	-0.401506	9.21197e+06	8.0691e+06	8.52875e+06	1.03102e+07	1.09663e+07	1.28153e+07	FALSE	FALSE
WDR5_MOUSE	1.66515	0.412844	-0.534529	132413	144930	180400	209922	242123	210983	FALSE	FALSE
SPEE_MOUSE	1.66422	0.412844	-0.40842	1.05459e+06	1.01653e+06	914947	1.2733e+06	1.20153e+06	1.48837e+06	FALSE	FALSE
CLD11_RAT;CLD11_MOUSE	1.66391	0.412844	0.448137	2.61936e+07	2.07506e+07	2.58975e+07	1.66865e+07	1.88819e+07	1.78237e+07	FALSE	FALSE
SCN2B_MOUSE	1.66339	0.412844	-0.298435	951922	1.0766e+06	1.03311e+06	1.20181e+06	1.19732e+06	1.3661e+06	FALSE	FALSE
ATPF2_MOUSE	1.66308	0.412844	-0.729126	388461	317007	479746	567781	732660	664213	FALSE	FALSE
GCR_MOUSE	1.66077	0.412844	-0.345018	54604.6	56986.2	49502.7	75227.6	64952.3	64436.6	FALSE	FALSE
CCAR1_MOUSE	1.6596	0.412844	-0.850975	168883	144782	109750	270510	287849	205365	FALSE	FALSE
MARK4_MOUSE	1.65702	0.412844	-0.273575	267154	245121	259699	338155	290119	304888	FALSE	FALSE
EMD_MOUSE	1.65689	0.412844	-0.373919	281058	348898	294685	385348	423749	389116	FALSE	FALSE
BORC6_MOUSE	1.65588	0.412844	0.566565	138190	124702	114412	75783.4	77214.1	101766	FALSE	FALSE
AN13A_MOUSE	1.65384	0.412097	-0.478222	58039.9	42415.3	46580.9	69608.4	66758.9	68459	FALSE	FALSE
PLOD3_MOUSE	1.64919	0.408746	-1.41909	6501.11	13257	17287.3	33472.6	34363.3	31234.8	FALSE	FALSE
AAKG2_MOUSE	1.64683	0.408544	-1.09882	133961	239888	117523	319657	374652	358110	FALSE	FALSE
NAMPT_MOUSE	1.64482	0.408544	0.280598	544959	564587	514805	464723	467823	404700	FALSE	FALSE
DEN2A_MOUSE	1.64407	0.408544	-0.743345	39436.2	53625.3	47178.9	96011.1	71702.9	67057.8	FALSE	FALSE
CDK14_MOUSE	1.64242	0.408387	-0.35456	235050	218942	247242	303493	267342	325761	FALSE	FALSE
AL3B1_MOUSE;AL3B2_MOUSE	1.63681	0.406351	-0.659878	12280.2	9762.7	11634.2	20816.9	17905.1	14487.8	FALSE	FALSE
CADH2_MOUSE;CADH2_RAT	1.63659	0.406351	-0.278772	6.85659e+06	7.18563e+06	7.06842e+06	9.26792e+06	8.58312e+06	7.75959e+06	FALSE	FALSE
CSDC2_MOUSE	1.63658	0.406351	0.995856	822984	682712	800636	518368	265246	372868	FALSE	FALSE
KSR2_MOUSE	1.63461	0.406099	-0.647258	110279	87396.5	100116	185502	151164	129733	FALSE	FALSE
MAAI_MOUSE	1.63025	0.406099	-0.604463	1.64191e+06	1.57698e+06	1.61787e+06	2.11216e+06	3.02868e+06	2.21302e+06	FALSE	FALSE
CAZA2_MOUSE;CAZA1_RAT;CAZA2_RAT	1.62523	0.406099	-0.352268	1.26583e+07	1.04633e+07	1.07561e+07	1.3416e+07	1.47682e+07	1.50629e+07	FALSE	FALSE
NU4M_RAT	1.62486	0.406099	-0.300097	437953	366289	436454	516025	502746	508808	FALSE	FALSE
PFD5_MOUSE	1.62417	0.406099	1.40627	601703	466769	775682	355211	164217	176342	FALSE	FALSE
FGFR3_MOUSE;FGFR1_MOUSE;FGFR2_MOUSE	1.61827	0.406099	-0.864793	166044	146103	189784	376181	310615	227261	FALSE	FALSE
SNAB_MOUSE	1.61466	0.406099	-0.293137	2.61715e+07	2.43073e+07	2.36891e+07	2.97379e+07	2.80297e+07	3.31105e+07	FALSE	FALSE
GAL3A_MOUSE	1.61425	0.406099	-0.367131	1.85833e+07	1.91975e+07	1.87973e+07	2.20273e+07	2.77592e+07	2.31871e+07	FALSE	FALSE
DAB2P_MOUSE	1.61358	0.406099	-0.320111	789892	819274	768840	1.0886e+06	993256	886908	FALSE	FALSE
CSN6_MOUSE	1.61241	0.406099	-0.356545	2.82895e+06	2.52015e+06	2.56378e+06	3.27761e+06	3.08372e+06	3.76998e+06	FALSE	FALSE
CUL4A_MOUSE	1.61095	0.406099	-0.434177	297558	223167	242895	347359	353307	331092	FALSE	FALSE
FLII_MOUSE	1.60331	0.406099	-2.13129	55326.7	16501	62945.7	153596	264802	172066	FALSE	FALSE
MAP9_MOUSE	1.6007	0.406099	-0.334319	265072	322671	264652	366981	359508	348196	FALSE	FALSE
ABI1_MOUSE	1.60035	0.406099	-0.368413	1.64807e+06	1.51577e+06	1.93615e+06	2.17924e+06	2.12754e+06	2.27697e+06	FALSE	FALSE
RAP1A_MOUSE	1.59726	0.406099	0.64069	1.75683e+07	1.79174e+07	1.37046e+07	1.00138e+07	1.24791e+07	9.05807e+06	FALSE	FALSE
FMNL2_MOUSE;FMNL3_MOUSE	1.59282	0.406099	-1.11106	696759	329893	558192	985147	1.17642e+06	1.26177e+06	FALSE	FALSE
HDHD2_MOUSE	1.59269	0.406099	-0.482453	1.29986e+06	1.39675e+06	1.18213e+06	1.56369e+06	1.77966e+06	2.0757e+06	FALSE	FALSE
GRHPR_MOUSE	1.59197	0.406099	-0.52267	1.32737e+06	1.2944e+06	1.23783e+06	1.79093e+06	1.5582e+06	2.19561e+06	FALSE	FALSE
KBTBB_MOUSE	1.59131	0.406099	-0.584099	337666	357991	476736	645521	574633	537386	FALSE	FALSE
ICEF1_MOUSE	1.58987	0.406099	-1.32598	16651.1	36472.2	26473.2	63280.1	85489.1	50786.3	FALSE	FALSE
TRA2A_MOUSE	1.58945	0.406099	-0.502553	274981	198890	231205	306189	351836	340872	FALSE	FALSE
DYR_MOUSE	1.58852	0.406099	2.83875	100209	132590	105920	37713.4	6018.15	3612.69	FALSE	FALSE
ASPP1_MOUSE	1.58801	0.406099	-1.42555	89407.1	79037.1	113141	148271	348258	259861	FALSE	FALSE
TT39C_MOUSE	1.58796	0.406099	0.427763	236144	198183	256265	174109	180223	159063	FALSE	FALSE
MBP_RAT	1.58701	0.406099	-0.582106	5.28283e+06	4.36385e+06	6.56355e+06	7.71072e+06	8.39867e+06	8.15787e+06	FALSE	FALSE
CSN7A_MOUSE	1.58663	0.406099	-0.385646	2.47832e+06	2.34201e+06	1.95321e+06	2.76651e+06	3.02514e+06	3.05762e+06	FALSE	FALSE
CE051_MOUSE	1.5854	0.406099	-0.444733	472100	490922	373569	645491	585536	588157	FALSE	FALSE
PPP6_MOUSE	1.58516	0.406099	-0.437203	427270	364982	404693	534247	611923	474467	FALSE	FALSE
CYAC3_MOUSE	1.58495	0.406099	-0.44616	1.49002e+06	1.30418e+06	1.15472e+06	1.70532e+06	1.68915e+06	1.98557e+06	FALSE	FALSE
EI2BE_MOUSE	1.58429	0.406099	-1.13981	149145	69124.3	97824.7	248581	256483	191460	FALSE	FALSE
HCD2_MOUSE;HCD2_RAT	1.58367	0.406099	-0.68117	5.43724e+06	4.42118e+06	5.18268e+06	6.73499e+06	9.97621e+06	7.40628e+06	FALSE	FALSE
FA92A_MOUSE	1.58222	0.406099	-0.676065	67310.4	89691.4	59617.8	128030	101245	116836	FALSE	FALSE
ITA6_MOUSE	1.57717	0.406099	-0.459933	1.34828e+06	1.22125e+06	1.43669e+06	2.09943e+06	1.8115e+06	1.59953e+06	FALSE	FALSE
K319L_MOUSE	1.57526	0.406099	-6.9547	91.087	0	141.809	14932	11867	2459.32	FALSE	FALSE
PPM1H_MOUSE;PPM1J_MOUSE;PPM1M_MOUSE	1.57453	0.406099	0.431669	457886	483146	438179	400072	317839	304641	FALSE	FALSE
VP13A_MOUSE	1.57375	0.406099	1.81585	55725.7	26704.2	79143.2	19224.8	14233.1	12432.9	FALSE	FALSE
CR025_MOUSE	1.57257	0.406099	0.612017	215944	270312	256577	130919	167663	187439	FALSE	FALSE
FCHO1_MOUSE	1.57162	0.406099	-1.55919	16363.8	32220.5	11373.2	75851.6	46362.8	54478.4	FALSE	FALSE
SGIP1_MOUSE	1.57044	0.406099	-0.270732	1.09924e+07	1.09665e+07	1.13971e+07	1.44968e+07	1.3632e+07	1.21124e+07	FALSE	FALSE
PCID2_MOUSE	1.5695	0.406099	-0.450018	29787.7	25348.3	31759.4	44547.3	36349.3	37808.6	FALSE	FALSE
ORN_MOUSE	1.56899	0.406099	-0.979218	350581	288169	242722	501014	459677	777043	FALSE	FALSE
FA49A_MOUSE	1.56887	0.406099	-0.4465	1.42631e+06	1.18709e+06	1.41217e+06	1.72209e+06	1.68045e+06	2.08323e+06	FALSE	FALSE
EI2BA_MOUSE	1.56863	0.406099	-1.0206	94120.9	69681.5	78330	111775	175824	203634	FALSE	FALSE
ATPG_MOUSE	1.56863	0.406099	-0.416883	3.60932e+07	3.68767e+07	3.51304e+07	4.48076e+07	4.3329e+07	5.61818e+07	FALSE	FALSE
RABE1_MOUSE	1.56662	0.406099	-0.580934	4.49322e+06	4.16399e+06	5.38371e+06	8.29515e+06	6.46536e+06	6.24214e+06	FALSE	FALSE
PEX5_MOUSE	1.56594	0.406099	-0.697771	81718.9	110520	132287	189823	173200	163359	FALSE	FALSE
K1C42_RAT	1.56583	0.406099	1.56222	59856.8	56280.4	120206	19784.3	37484.6	22762.3	FALSE	FALSE
STAG2_MOUSE;STAG1_MOUSE	1.56491	0.406099	-0.708278	89618.6	62105.5	94142.3	136566	147876	117269	FALSE	FALSE
ECM29_MOUSE	1.56382	0.406099	0.512431	91229.7	72126.4	85534.7	56987.1	66605.1	50889.4	FALSE	FALSE
PREX1_MOUSE	1.5635	0.406099	3.71012	5468.57	1468.93	12469.5	288.805	758.157	433.129	FALSE	FALSE
CRYL1_MOUSE	1.56248	0.406099	-0.399742	421185	439069	441966	512781	541677	663523	FALSE	FALSE
SYIC_MOUSE	1.56224	0.406099	-1.9673	583889	143305	510275	1.64723e+06	1.47331e+06	1.71842e+06	FALSE	FALSE
PCNA_MOUSE	1.56198	0.406099	-0.29213	295186	314680	289198	349641	344361	406854	FALSE	FALSE
ROGDI_MOUSE	1.56103	0.406099	-0.371679	3.786e+06	3.40748e+06	3.6328e+06	4.43807e+06	4.25436e+06	5.31523e+06	FALSE	FALSE
SRGP1_MOUSE	1.5588	0.406099	-0.417714	272936	223961	293395	357962	367795	329922	FALSE	FALSE
HUWE1_MOUSE	1.55823	0.406099	0.316533	179438	150716	179546	133693	131888	143707	FALSE	FALSE
RPAB1_MOUSE	1.5582	0.406099	-1.04797	147525	155612	143510	203090	405107	315299	FALSE	FALSE
PP1G_MOUSE	1.55727	0.406099	-0.335317	2.39803e+06	2.01784e+06	2.03618e+06	2.52235e+06	2.7161e+06	2.9018e+06	FALSE	FALSE
CPNE6_MOUSE;CPNE7_RAT	1.55693	0.406099	0.278221	1.72305e+06	1.48627e+06	1.54124e+06	1.38263e+06	1.31095e+06	1.22376e+06	FALSE	FALSE
CSRP1_MOUSE	1.55313	0.40439	-0.629875	1.6241e+07	1.11646e+07	1.4565e+07	2.00913e+07	2.47826e+07	2.00729e+07	FALSE	FALSE
IMPA1_MOUSE	1.54985	0.403182	-0.639016	2.85505e+06	4.02573e+06	3.05254e+06	4.51881e+06	5.96778e+06	4.98223e+06	FALSE	FALSE
EXOC8_MOUSE	1.54796	0.403182	-0.551192	336475	241174	346900	462194	454680	437865	FALSE	FALSE
ACYP1_MOUSE	1.54186	0.403182	7.10296	51421.3	26892.6	58321.4	133.853	857.103	0	FALSE	FALSE
HAX1_MOUSE	1.54184	0.403182	-0.38074	223303	217282	205602	297204	240894	303244	FALSE	FALSE
TPIS_MOUSE	1.54125	0.403182	-0.517271	1.82324e+08	1.94547e+08	1.61498e+08	2.12649e+08	2.81511e+08	2.76378e+08	FALSE	FALSE
SYCM_MOUSE	1.54099	0.403182	0.881674	152111	223047	169544	76550.3	92635.1	126443	FALSE	FALSE
UCK1_MOUSE	1.54066	0.403182	-0.50305	405121	417073	429872	531699	527863	714875	FALSE	FALSE
RM43_MOUSE	1.53916	0.403182	0.414105	432864	435307	443757	384972	285704	313906	FALSE	FALSE
RAB6A_MOUSE	1.53914	0.403182	-0.472672	5.19109e+06	4.57975e+06	5.70528e+06	6.36282e+06	8.18858e+06	6.92446e+06	FALSE	FALSE
ABHD6_MOUSE	1.53449	0.403182	-0.590797	132231	99513	126709	150584	196916	192360	FALSE	FALSE
CDK5_MOUSE	1.53372	0.403182	-0.45903	1.65226e+06	2.07004e+06	1.52185e+06	2.48003e+06	2.48524e+06	2.24343e+06	FALSE	FALSE
NPTXR_MOUSE	1.53323	0.403182	1.05898	212346	228972	145254	84805.1	69977.5	126753	FALSE	FALSE
PLP2_MOUSE	1.53275	0.403182	-0.736008	377957	454857	648866	817845	865121	784864	FALSE	FALSE
CETN2_MOUSE;CETN1_MOUSE;CETN4_MOUSE	1.53212	0.403182	0.717955	1.85556e+06	2.31385e+06	1.51075e+06	1.16449e+06	986169	1.30265e+06	FALSE	FALSE
K2C8_MOUSE	1.53186	0.403182	-2.34921	31349.7	70367.3	36906.2	100112	391909	214340	FALSE	FALSE
GDPD1_MOUSE	1.52927	0.403182	-0.494341	1.06641e+06	875085	938199	1.13593e+06	1.48804e+06	1.43259e+06	FALSE	FALSE
ELP5_MOUSE	1.52879	0.403182	-0.504917	378537	461257	376170	531159	522838	671509	FALSE	FALSE
TM199_MOUSE	1.52793	0.403182	0.514003	140588	134716	126433	76095.3	109541	95689.6	FALSE	FALSE
ACAP2_MOUSE	1.52587	0.403182	0.971286	295757	313983	249349	142248	97976.5	197953	FALSE	FALSE
LCAP_MOUSE	1.52464	0.403182	-1.69666	95303.5	24943.5	54123.7	163268	216057	185904	FALSE	FALSE
SGCD_MOUSE	1.52425	0.403182	-1.05999	36455.6	68839.9	36620.1	80525.4	102388	112971	FALSE	FALSE
NECA1_MOUSE	1.52359	0.403182	0.435324	63396.1	48417.2	54990.2	37502.7	43492.5	42359.7	FALSE	FALSE
TSC1_MOUSE	1.52348	0.403182	-0.437916	280037	262790	230973	358746	386343	303137	FALSE	FALSE
AUP1_MOUSE	1.52321	0.403182	1.68401	1381.79	1591.5	1947.37	939.991	308.764	280.567	FALSE	FALSE
GAPD1_MOUSE	1.5218	0.403182	1.10758	149579	93497.3	82548.8	37557.5	54754	58799.9	FALSE	FALSE
NCOA7_MOUSE	1.52161	0.403182	-0.45137	323247	349727	365352	557147	424390	438206	FALSE	FALSE
NDUS4_MOUSE	1.51824	0.400795	0.38208	5.8839e+06	7.066e+06	5.72083e+06	4.4048e+06	5.14035e+06	4.78147e+06	FALSE	FALSE
NDUB3_MOUSE	1.51583	0.399937	1.10256	109141	111310	89457.6	66468.9	29349.4	48501.1	FALSE	FALSE
RHG35_MOUSE	1.51362	0.399937	1.30125	163263	138000	100762	32989.3	78802.7	51338.2	FALSE	FALSE
ENPP6_RAT	1.51351	0.399937	-0.781443	7344.38	12640.8	7708.11	16572.3	15458.4	15572.1	FALSE	FALSE
GBB4_MOUSE	1.51156	0.398948	-0.599589	2.04738e+06	1.35743e+06	1.81165e+06	2.43085e+06	2.60825e+06	2.86532e+06	FALSE	FALSE
AGRL2_RAT	1.50907	0.39744	-0.658694	3826.22	4191.9	2692.5	5201.98	5510.28	6197.82	FALSE	FALSE
AKTIP_MOUSE	1.50813	0.39744	-0.440175	301234	228942	296473	362971	358400	400200	FALSE	FALSE
F1712_MOUSE	1.50657	0.397388	-0.484176	207057	222515	212069	359960	264379	273181	FALSE	FALSE
AN32E_MOUSE	1.50476	0.397388	-0.356781	614813	628981	539005	680004	772597	830391	FALSE	FALSE
RL36_MOUSE	1.50175	0.397388	1.66132	1.42077e+06	966583	1.52711e+06	736335	224078	277139	FALSE	FALSE
VDAC2_MOUSE;VDAC2_RAT	1.50064	0.397388	-0.408011	6.9375e+07	5.75759e+07	6.64435e+07	8.01249e+07	7.93184e+07	9.7163e+07	FALSE	FALSE
SNF8_MOUSE	1.49952	0.397388	0.405987	372129	383040	346265	324626	258403	248244	FALSE	FALSE
LMAN1_MOUSE	1.49933	0.397388	0.775192	1.16023e+06	928781	678080	519969	572348	524523	FALSE	FALSE
VIGLN_MOUSE	1.4987	0.397388	-1.42402	234195	143456	259853	376262	836504	497863	FALSE	FALSE
L1CAM_MOUSE	1.49679	0.397388	-1.40177	1.19614e+06	592377	1.709e+06	3.33398e+06	3.38251e+06	2.52486e+06	FALSE	FALSE
MARK3_MOUSE	1.49629	0.397388	0.361499	516573	600996	521488	433182	377989	464597	FALSE	FALSE
COMT_MOUSE	1.49554	0.397388	-0.534729	699575	721937	560512	835114	1.10741e+06	928776	FALSE	FALSE
P5CR2_MOUSE;P5CR1_MOUSE	1.49505	0.397388	-0.443883	1.2617e+06	1.09261e+06	1.19188e+06	1.51441e+06	1.42838e+06	1.88094e+06	FALSE	FALSE
SUMO1_MOUSE	1.49215	0.397388	0.738621	515352	674188	492494	345220	402390	260451	FALSE	FALSE
CA2D1_RAT	1.49203	0.397388	1.33936	1.86674e+06	2.87369e+06	1.75515e+06	1.2769e+06	523970	766143	FALSE	FALSE
PSA1_MOUSE	1.49186	0.397388	-0.330757	6.94107e+06	6.45973e+06	6.22866e+06	7.69256e+06	7.70519e+06	9.2897e+06	FALSE	FALSE
CSK2B_MOUSE	1.49177	0.397388	-0.656512	729290	649333	567100	812023	1.21898e+06	1.03598e+06	FALSE	FALSE
UBL4A_MOUSE	1.49169	0.397388	1.38935	391562	361151	544725	263385	95896.7	135994	FALSE	FALSE
ODPB_MOUSE	1.48875	0.397388	-0.460208	2.91379e+07	2.85165e+07	2.86704e+07	3.48671e+07	3.64538e+07	4.74397e+07	FALSE	FALSE
UFSP2_MOUSE	1.48866	0.397388	-0.584632	103705	72687.5	108083	146011	147861	132745	FALSE	FALSE
ARMC9_MOUSE	1.48754	0.397388	-0.69382	41187.4	31502.7	51377.9	74028.4	67063.5	59597.6	FALSE	FALSE
RED_MOUSE	1.4871	0.397388	-0.549632	108955	125070	161724	206738	192468	180058	FALSE	FALSE
PTPRS_RAT	1.48647	0.397388	0.579525	129316	141865	113733	98927.6	68501.5	90148	FALSE	FALSE
DCC_RAT;DCC_MOUSE	1.4861	0.397388	-0.467145	144764	127258	103297	176976	179873	161982	FALSE	FALSE
MSMO1_RAT	1.48352	0.396164	0.29788	379031	338354	401145	279470	313381	317012	FALSE	FALSE
TUB_MOUSE;TULP1_MOUSE	1.48257	0.396119	-0.502858	132058	160350	171870	243774	188883	225234	FALSE	FALSE
TPPP_MOUSE	1.4814	0.395858	-0.277977	4.96275e+07	5.7612e+07	5.09923e+07	6.02718e+07	6.88414e+07	6.27419e+07	FALSE	FALSE
HCFC1_MOUSE	1.47871	0.394918	-0.475004	689497	632001	775691	1.08525e+06	1.00795e+06	821725	FALSE	FALSE
GL1D1_MOUSE	1.47866	0.394918	1.05233	107422	110860	103234	30008.3	63248.9	61773	FALSE	FALSE
STX4_MOUSE	1.47729	0.394875	-0.527658	1.03276e+06	1.10942e+06	910298	1.42139e+06	1.24342e+06	1.73561e+06	FALSE	FALSE
3HIDH_MOUSE	1.47657	0.394875	-0.463384	6.6416e+06	7.1895e+06	6.73545e+06	8.51702e+06	8.51461e+06	1.1325e+07	FALSE	FALSE
DPCD_MOUSE	1.47592	0.394875	-0.494362	153240	193652	214796	261511	243781	285958	FALSE	FALSE
PI3R4_RAT	1.4747	0.394553	1.89521	72221.4	119121	39177.6	24210.4	12320.7	25438.7	FALSE	FALSE
RDH14_MOUSE;RDH12_MOUSE	1.47165	0.393118	-0.523945	666843	838650	673469	939041	964242	1.22981e+06	FALSE	FALSE
CLVS2_MOUSE	1.47054	0.393118	-0.329559	925621	779138	833271	964171	1.0734e+06	1.15179e+06	FALSE	FALSE
LMAN2_MOUSE	1.46963	0.393118	-0.303575	1.56446e+06	1.34395e+06	1.36382e+06	1.73177e+06	1.90879e+06	1.63223e+06	FALSE	FALSE
CAPS1_MOUSE	1.46801	0.393118	-0.914649	8.25446e+06	5.05962e+06	8.64667e+06	1.23537e+07	1.70414e+07	1.20034e+07	FALSE	FALSE
DEN5A_RAT	1.467	0.393118	1.95519	118381	196673	86530.2	61600.5	16095.4	25865.2	FALSE	FALSE
IQEC1_MOUSE;IQEC2_MOUSE	1.46503	0.393118	-0.547203	2.30583e+06	1.95758e+06	2.51238e+06	3.87882e+06	3.21611e+06	2.80619e+06	FALSE	FALSE
DCTN1_MOUSE	1.46502	0.393118	-0.79824	2.62028e+06	1.59084e+06	2.71667e+06	3.54555e+06	4.24085e+06	4.26088e+06	FALSE	FALSE
UB2L3_MOUSE;ZC3H6_MOUSE	1.46208	0.391656	0.436706	1.44771e+07	1.62761e+07	1.68433e+07	1.29109e+07	9.80467e+06	1.24497e+07	FALSE	FALSE
P4HTM_MOUSE	1.45947	0.389919	0.530313	173231	183786	148106	137647	97424	114678	FALSE	FALSE
MARE3_MOUSE	1.45672	0.38919	-0.375436	1.15357e+07	1.06825e+07	10860289	1.4119e+07	1.24704e+07	1.6321e+07	FALSE	FALSE
K1549_MOUSE	1.45569	0.38919	0.32622	248562	232492	243850	170431	190019	217751	FALSE	FALSE
PCDG4_MOUSE	1.45518	0.38919	-0.47593	314937	349086	305886	529535	437514	381917	FALSE	FALSE
SHSA4_MOUSE	1.45247	0.38919	-0.578036	291018	223831	232779	319414	443908	352751	FALSE	FALSE
DBND1_MOUSE	1.45188	0.38919	-0.414233	173540	203126	178311	235447	219946	284164	FALSE	FALSE
AMPN_RAT	1.45026	0.38919	1.91627	151013	371385	167567	104832	39242.4	38721.2	FALSE	FALSE
DNJC5_MOUSE;DNJC5_RAT	1.44889	0.38919	-0.49681	4.59485e+07	4.83611e+07	4.10232e+07	5.60307e+07	5.85896e+07	7.63462e+07	FALSE	FALSE
SF3B1_MOUSE	1.44807	0.38919	-1.42975	464035	179054	416561	724979	1.21898e+06	910754	FALSE	FALSE
OXR1_MOUSE	1.44565	0.38919	-0.407198	1.05066e+07	1.02736e+07	1.03878e+07	1.611e+07	1.33002e+07	1.19219e+07	FALSE	FALSE
DCTN3_MOUSE	1.44504	0.38919	-0.959631	1.76453e+06	1.8178e+06	2.17997e+06	2.45493e+06	4.49607e+06	4.2556e+06	FALSE	FALSE
FLIP1_MOUSE	1.44493	0.38919	-0.776424	1.28913e+06	1.61155e+06	1.1126e+06	1.72557e+06	2.57957e+06	2.56913e+06	FALSE	FALSE
RB3GP_MOUSE;RB3GP_RAT	1.44458	0.38919	-0.280723	1.6716e+06	1.48632e+06	1.74203e+06	2.01704e+06	2.10376e+06	1.83168e+06	FALSE	FALSE
MYO1E_MOUSE;MYO1F_MOUSE	1.4438	0.38919	-0.365926	323676	335425	296144	470417	385650	374967	FALSE	FALSE
CYTC_MOUSE	1.44367	0.38919	0.60077	6.6199e+06	6.07701e+06	5.5428e+06	5.05126e+06	3.27729e+06	3.69875e+06	FALSE	FALSE
PHAR4_MOUSE	1.44256	0.38919	-0.649515	82198.6	132662	86485.5	155989	153986	162730	FALSE	FALSE
PUR4_MOUSE	1.44196	0.38919	-1.31519	1.56787e+06	605876	1.52973e+06	3.30518e+06	3.23867e+06	2.67173e+06	FALSE	FALSE
IF4A3_MOUSE	1.44164	0.38919	0.463409	523412	423332	564961	406320	347737	342337	FALSE	FALSE
APT_MOUSE	1.44073	0.389118	-0.437957	4.1436e+06	3.25248e+06	4.21989e+06	4.72942e+06	5.66027e+06	5.34628e+06	FALSE	FALSE
GALM_MOUSE	1.4396	0.389105	-0.620768	609373	669941	740400	891612	1.30216e+06	911930	FALSE	FALSE
ENOPH_MOUSE	1.43831	0.389105	-0.423738	1.62594e+06	1.77468e+06	1.51614e+06	1.97469e+06	2.05437e+06	2.56629e+06	FALSE	FALSE
LAMA3_MOUSE	1.43819	0.389105	2.60638	240546	993104	900305	154762	56566.2	139087	FALSE	FALSE
SMBP2_MOUSE	1.43739	0.389105	-0.755149	965540	609014	736891	1.5568e+06	1.07419e+06	1.27028e+06	FALSE	FALSE
DHRS7_MOUSE	1.43586	0.388447	-0.458601	797809	603600	690863	874575	916441	1.0842e+06	FALSE	FALSE
AAKG1_MOUSE	1.43469	0.388447	-0.474728	204697	149942	210443	254891	271196	259185	FALSE	FALSE
AKAP5_MOUSE	1.43322	0.388447	-1.16357	63479.2	43720.6	114518	160323	184800	151552	FALSE	FALSE
E41L3_MOUSE	1.43297	0.388447	-0.597864	1.48871e+07	1.07238e+07	1.58454e+07	1.965e+07	2.37303e+07	1.93626e+07	FALSE	FALSE
SCAF8_RAT	1.43237	0.388447	-0.386099	94639.8	110930	95850.4	150134	122144	121635	FALSE	FALSE
SYT12_MOUSE	1.42646	0.386122	-0.342866	491399	482599	386102	579774	556509	588696	FALSE	FALSE
NELFE_MOUSE	1.42587	0.386122	0.68137	28475.9	30288	38954.2	23787.1	21366.5	15779.6	FALSE	FALSE
NHRF2_MOUSE	1.4256	0.386122	0.368006	328450	371847	368940	248821	261909	317771	FALSE	FALSE
DCNL3_MOUSE	1.42547	0.386122	-0.767118	35779.3	43161.6	23919.5	58241.9	53010.8	63804	FALSE	FALSE
IF4G3_MOUSE	1.42528	0.386122	0.317098	193768	161136	158405	131496	144970	135557	FALSE	FALSE
PGES2_MOUSE	1.42304	0.386122	-0.431204	1.58691e+06	1.71537e+06	1.48679e+06	1.89617e+06	2.03412e+06	2.52709e+06	FALSE	FALSE
TF65_MOUSE	1.42293	0.386122	-2.0136	13640.1	6039.19	40760	81520.5	83937.5	78598.8	FALSE	FALSE
CCD47_MOUSE	1.42155	0.386063	0.41348	489510	555929	412022	372987	377596	343693	FALSE	FALSE
MP2K6_MOUSE;MP2K3_MOUSE	1.41999	0.386063	-0.55974	835533	684113	867580	1.03052e+06	1.4203e+06	1.06795e+06	FALSE	FALSE
BECN1_MOUSE	1.41965	0.386063	0.72922	153039	173477	180623	105512	72548.3	127860	FALSE	FALSE
PGTB2_MOUSE	1.41856	0.385813	-0.371188	1.12827e+06	862482	1.03635e+06	1.3135e+06	1.22573e+06	1.37608e+06	FALSE	FALSE
SE1L1_MOUSE	1.4162	0.385813	0.360419	701793	719748	645357	568191	457870	583925	FALSE	FALSE
ZCHC8_MOUSE	1.41443	0.384834	-0.550659	31898.6	38445.8	31157.6	56354.5	52340.1	39982.3	FALSE	FALSE
RPTOR_MOUSE;SNX20_RAT	1.4122	0.383812	-2.12122	56020.5	22262.4	131357	352916	365730	193430	FALSE	FALSE
AMER2_MOUSE	1.41163	0.383812	-0.687591	145371	230317	158276	332945	257624	269432	FALSE	FALSE
MSRB2_MOUSE	1.41024	0.383812	1.63611	91753.8	69058.8	135814	55722.1	17227.3	22480	FALSE	FALSE
YBOX3_MOUSE	1.41023	0.383812	1.06531	184583	205180	172694	80678.9	54327	133774	FALSE	FALSE
TCPB_RAT	1.40929	0.383656	-0.392323	90789.8	73914.4	84312.5	117654	114102	95080.9	FALSE	FALSE
CP110_MOUSE	1.4051	0.381731	-0.488722	110797	91176.3	92293.3	151919	113831	147167	FALSE	FALSE
APBA1_MOUSE;APBA1_RAT	1.40451	0.381731	-0.51433	1.33476e+06	1.2617e+06	1.32743e+06	2.27468e+06	1.54602e+06	1.78392e+06	FALSE	FALSE
GLSL_MOUSE	1.40422	0.381731	0.510392	100717	105578	101194	58120.2	69405.4	88340.8	FALSE	FALSE
CHAP1_MOUSE	1.40116	0.38167	-0.449563	58380.3	45308.7	54962.8	82071.1	69994.1	64594.9	FALSE	FALSE
ILEUA_MOUSE	1.40105	0.38167	-0.455005	60684.1	44513.2	43627.3	66783.4	70775	66449.5	FALSE	FALSE
UFL1_MOUSE	1.40072	0.38167	-0.990228	118930	156708	208853	272858	429764	259821	FALSE	FALSE
UBP8_MOUSE	1.40055	0.38167	-0.336942	637487	540298	583256	814193	749416	660721	FALSE	FALSE
XRN2_MOUSE	1.4002	0.38167	-0.376069	221844	225958	215844	324765	292496	244021	FALSE	FALSE
NDKA_MOUSE	1.39914	0.38167	0.744908	7.88757e+06	7.60228e+06	8.96419e+06	6.11872e+06	3.39502e+06	5.07813e+06	FALSE	FALSE
ECHD1_MOUSE	1.39802	0.38167	-0.377503	2.19797e+06	1.67692e+06	1.70064e+06	2.4748e+06	2.4384e+06	2.32992e+06	FALSE	FALSE
UBE4B_MOUSE	1.39649	0.38167	-1.02649	280268	139478	307101	503120	534792	442722	FALSE	FALSE
RAE1L_MOUSE	1.39641	0.38167	-0.463076	135452	142278	130111	219715	187444	155043	FALSE	FALSE
RN114_MOUSE	1.39378	0.380427	0.726958	216302	290108	293126	192960	169398	120702	FALSE	FALSE
GET4_MOUSE	1.39293	0.380427	-0.308861	915883	824142	857513	955558	1.07113e+06	1.19096e+06	FALSE	FALSE
RACK1_MOUSE	1.39286	0.380427	-0.367822	4.44517e+06	3.40403e+06	3.77929e+06	4.62531e+06	5.12598e+06	5.25415e+06	FALSE	FALSE
PFD2_MOUSE	1.39193	0.380256	0.649535	3.3097e+06	5.07997e+06	3.97526e+06	3.04389e+06	2.51789e+06	2.32069e+06	FALSE	FALSE
UCHL3_MOUSE;UCHL4_MOUSE	1.39092	0.380015	0.507113	2.18837e+06	2.49748e+06	2.09291e+06	1.44091e+06	1.94939e+06	1.37943e+06	FALSE	FALSE
OPLA_MOUSE;OPLA_RAT	1.39005	0.3799	-0.687761	610926	471306	614177	1.11349e+06	909313	709746	FALSE	FALSE
SE6L2_MOUSE	1.38818	0.379426	-1.37458	131103	77168.2	189887	239720	476245	316430	FALSE	FALSE
FBX30_MOUSE	1.38745	0.379426	-0.672674	124360	169045	119993	270085	186202	202682	FALSE	FALSE
NIPS1_MOUSE	1.38549	0.378726	-0.347624	8.98393e+06	9.02713e+06	8.18961e+06	1.10848e+07	1.25286e+07	9.72596e+06	FALSE	FALSE
LCAP_RAT	1.38406	0.378726	1.05963	204659	228227	304449	175221	80427.2	98091.2	FALSE	FALSE
ANS1A_MOUSE	1.38316	0.378726	-0.461924	5.01606e+06	4.51469e+06	5.74145e+06	8.13292e+06	6.16125e+06	6.74141e+06	FALSE	FALSE
NB5R3_MOUSE	1.38267	0.378726	-0.342658	2.63313e+06	2.5523e+06	2.68103e+06	2.93331e+06	3.22632e+06	3.81576e+06	FALSE	FALSE
CDC23_MOUSE	1.38165	0.378726	0.69114	200317	155375	150318	87892.4	90445.7	135065	FALSE	FALSE
A1AT2_MOUSE	1.38133	0.378726	-8.18544	1672.12	0	0	3182.99	252798	231668	TRUE	FALSE
SMCE1_MOUSE	1.37935	0.377488	-0.413409	134435	117608	118574	189712	162424	141463	FALSE	FALSE
ABCA5_MOUSE	1.37839	0.377275	-4.57031	7465.49	492.823	351.753	9069.14	79660	108765	FALSE	FALSE
CYC_MOUSE;CYC2_MOUSE;CYC_RAT	1.37351	0.374917	1.4345	2.6822e+06	2.06666e+06	2.1056e+06	1.5448e+06	501948	489235	FALSE	FALSE
PEF1_MOUSE	1.37248	0.374917	-0.694244	1.15589e+06	1.07168e+06	998186	1.25844e+06	1.98275e+06	1.9782e+06	FALSE	FALSE
XYLK_MOUSE	1.372	0.374917	0.68953	15581.4	25087.1	16869	11367.2	13128.7	11179.5	FALSE	FALSE
SRGP3_MOUSE	1.37159	0.374917	-0.474563	1.67884e+06	1.26205e+06	1.79074e+06	2.30857e+06	2.01657e+06	2.24945e+06	FALSE	FALSE
THNS2_MOUSE	1.37003	0.374101	-0.733438	64531.2	36349.5	48350	85207.1	91321.2	71584.1	FALSE	FALSE
COX5A_MOUSE;COX5A_RAT	1.3689	0.373705	0.979982	1.16038e+06	1.19791e+06	1.78221e+06	946214	668856	484102	FALSE	FALSE
FBX42_MOUSE	1.36683	0.372584	0.526909	99755.9	128126	125187	81025.5	68308.7	95709.4	FALSE	FALSE
ATP5L_MOUSE	1.3645	0.372394	2.00175	138374	134828	403447	79379.3	31743.8	57831.9	FALSE	FALSE
SNX24_MOUSE	1.36377	0.372394	-7.08614	314.401	258.075	82.7684	43424.9	45228.8	782.647	FALSE	FALSE
REEP2_MOUSE	1.3616	0.372394	1.25895	138121	198705	231234	58849.4	127096	51416.9	FALSE	FALSE
MDHM_MOUSE;MDHM_RAT	1.3614	0.372394	-0.447827	2.20977e+08	2.28676e+08	211854767	2.6297e+08	2.75951e+08	3.63365e+08	FALSE	FALSE
HEPH_RAT	1.3606	0.372394	2.04831	140286	324995	149147	91143.4	18809	38593.4	FALSE	FALSE
EFMT2_MOUSE	1.36019	0.372394	-0.577074	142871	104749	132717	163758	176083	227554	FALSE	FALSE
CSTF3_MOUSE	1.35884	0.372394	-0.687439	81574.8	51003.7	77698.5	125546	116882	96208.4	FALSE	FALSE
ASPH_MOUSE	1.35795	0.372394	-0.359728	478379	557848	417218	594684	651696	618658	FALSE	FALSE
MDGA1_MOUSE	1.35452	0.372394	-0.366351	369878	342743	377913	537047	462137	406613	FALSE	FALSE
BCAR1_MOUSE	1.35437	0.372394	-0.451528	506586	571579	557134	858947	763712	613594	FALSE	FALSE
STMN1_MOUSE	1.35287	0.372394	0.520534	1.8344e+07	2.44161e+07	2.0994e+07	1.77313e+07	1.33983e+07	1.33143e+07	FALSE	FALSE
SNAPN_MOUSE	1.35241	0.372394	0.618738	792310	803499	698678	605124	366967	522171	FALSE	FALSE
DOPD_MOUSE	1.35237	0.372394	0.766212	184749	212066	235342	128790	85541.6	157349	FALSE	FALSE
S2542_MOUSE	1.35209	0.372394	-0.50646	253692	182746	232973	287971	364634	298336	FALSE	FALSE
NYAP1_MOUSE	1.35199	0.372394	-0.320959	58810.9	64367.6	72539.5	74130.2	87072.6	83281.2	FALSE	FALSE
NUBPL_MOUSE	1.35134	0.372394	-0.275768	150173	169982	141116	179331	178524	200579	FALSE	FALSE
NRDC_RAT	1.35014	0.372394	2.52862	62640.8	144632	221756	54571.1	11211.6	8567.61	FALSE	FALSE
PHLB1_RAT	1.34897	0.372394	-0.287744	164524	147338	138790	189199	166422	194504	FALSE	FALSE
ANS1B_MOUSE	1.3483	0.372394	-0.465138	106255	73711.6	79698.8	114490	116717	127249	FALSE	FALSE
ETFA_MOUSE	1.34712	0.372394	-0.443253	7.692e+06	8.67414e+06	7.37766e+06	9.25762e+06	1.03328e+07	1.26933e+07	FALSE	FALSE
RL31_MOUSE	1.34657	0.372394	0.722739	5.66289e+06	5.53054e+06	6.18593e+06	4.71585e+06	2.51583e+06	3.29927e+06	FALSE	FALSE
NHLC2_MOUSE	1.34543	0.372394	-0.873127	366162	177952	306962	534065	561078	463715	FALSE	FALSE
WNK1_MOUSE;WNK4_MOUSE;WNK3_MOUSE	1.34487	0.372394	0.552492	98372.6	84479.7	94712.8	68042.3	47994.4	73217.8	FALSE	FALSE
PSA6_MOUSE	1.34392	0.372394	-0.528669	5.14024e+06	4.28566e+06	4.34914e+06	5.78762e+06	8.14544e+06	5.93879e+06	FALSE	FALSE
BAG2_MOUSE	1.3414	0.372394	-0.472719	261679	278619	353790	406373	367013	467362	FALSE	FALSE
UB2V2_MOUSE	1.34016	0.372394	0.352874	1.14384e+07	1.23067e+07	1.25759e+07	1.05634e+07	8.02322e+06	9.85354e+06	FALSE	FALSE
TET5C_RAT	1.33943	0.372394	-0.272897	476921	463062	574076	618267	607790	603277	FALSE	FALSE
LIMS1_MOUSE	1.33891	0.372394	-0.414598	637363	484927	516747	646817	750374	787528	FALSE	FALSE
LRRT1_MOUSE	1.33874	0.372394	-1.24314	33108.6	19353.4	16281.6	40743.3	78972.1	43014.1	FALSE	FALSE
PTN11_MOUSE	1.33858	0.372394	-0.308316	3.76677e+06	3.55573e+06	4.57666e+06	4.92213e+06	4.84232e+06	4.96983e+06	FALSE	FALSE
PDXK_MOUSE	1.33715	0.372394	-0.363388	1.05316e+07	9.88456e+06	1.02879e+07	1.23139e+07	1.17627e+07	1.54224e+07	FALSE	FALSE
DECR_MOUSE	1.33691	0.372394	-0.317772	2.70985e+06	2.16073e+06	2.72753e+06	3.26781e+06	3.14337e+06	3.05915e+06	FALSE	FALSE
PDLI4_MOUSE	1.33627	0.372394	-0.551394	130830	153728	115255	179254	236794	169879	FALSE	FALSE
A16A1_MOUSE	1.33548	0.372394	5.39601	8191.28	166367	115067	112.556	612.488	6150.27	FALSE	FALSE
DRC11_MOUSE	1.33543	0.372394	-2.76199	119163	70391	161945	1.11531e+06	1.06311e+06	205923	FALSE	FALSE
MTSSL_MOUSE	1.3343	0.372394	-0.386739	1.2713e+06	1.63385e+06	1.21735e+06	1.88403e+06	1.696e+06	1.80986e+06	FALSE	FALSE
ELP1_RAT	1.33418	0.372394	1.19642	1.38896e+06	1.63828e+06	1.47917e+06	1.09443e+06	365912	506063	FALSE	FALSE
PACS1_MOUSE	1.33293	0.372394	-0.526829	3.41738e+06	3.17916e+06	3.87065e+06	6.03854e+06	4.93098e+06	4.11119e+06	FALSE	FALSE
AN32B_MOUSE	1.33246	0.372394	-0.306144	1.47697e+06	1.30394e+06	1.32737e+06	1.51431e+06	1.68435e+06	1.88082e+06	FALSE	FALSE
RAD50_RAT	1.33196	0.372394	0.876906	42647.2	55724.7	62016.8	38358.8	19794.8	29182.2	FALSE	FALSE
NUP37_MOUSE	1.3316	0.372394	-0.607572	88618.9	70588.3	109774	136717	117418	155712	FALSE	FALSE
KPCD1_MOUSE	1.33136	0.372394	-0.473276	100388	108987	129124	168002	171348	130576	FALSE	FALSE
HYOU1_MOUSE	1.33045	0.372394	-1.54098	2.19773e+06	726457	2.89799e+06	5.40345e+06	6.39227e+06	5.14634e+06	FALSE	FALSE
PLXB1_MOUSE;PLXB3_MOUSE	1.32981	0.372394	-0.88303	336650	203958	391422	691692	479894	547308	FALSE	FALSE
RHG17_MOUSE	1.32884	0.372394	-0.632274	64252.6	74635.5	74902.9	138793	106937	85649.1	FALSE	FALSE
S2536_MOUSE;S2533_MOUSE	1.32861	0.372394	-0.43602	277462	201991	266754	308599	343085	357835	FALSE	FALSE
COG7_MOUSE	1.32826	0.372394	-1.09611	85073.1	32115.1	63136	137922	132921	114655	FALSE	FALSE
NOP16_MOUSE	1.32791	0.372394	0.550892	191330	280453	253239	180371	144915	169612	FALSE	FALSE
BRCC3_MOUSE	1.32766	0.372394	-0.400377	276334	244686	303638	364853	315468	408106	FALSE	FALSE
ACD10_MOUSE	1.3276	0.372394	-0.748037	29881.8	35885.8	24571	53400.8	60708.3	37617.2	FALSE	FALSE
MBLC2_MOUSE	1.32607	0.372173	-0.355744	1.12268e+06	1.12345e+06	964316	1.32486e+06	1.22804e+06	1.55533e+06	FALSE	FALSE
CAMP1_MOUSE	1.32505	0.372173	0.687384	103846	69025.5	72911.2	60599.1	41951.8	50073.7	FALSE	FALSE
WIPF3_MOUSE	1.32466	0.372173	2.31985	66638.6	71096.9	77239.2	2533.16	5597.11	34924.3	FALSE	FALSE
RM28_MOUSE	1.32416	0.372173	-0.367175	152714	187828	158166	195018	206994	241235	FALSE	FALSE
RGRF1_RAT	1.32404	0.372173	1.84595	448675	796487	420699	296441	57894.3	109060	FALSE	FALSE
PRPF3_MOUSE	1.31998	0.370006	0.743637	142449	140843	142683	57196.5	84741.1	112467	FALSE	FALSE
CORO6_MOUSE	1.31989	0.370006	0.783041	333248	305344	291883	134511	147793	258432	FALSE	FALSE
NPL_MOUSE	1.31878	0.369661	-0.462382	93566.8	100330	86942.3	104005	139691	143249	FALSE	FALSE
SRGP2_RAT	1.31822	0.369661	1.49291	150660	280131	126942	105810	39826.4	52522.4	FALSE	FALSE
RAP1B_MOUSE	1.3168	0.368951	0.614164	5.59256e+06	5.5556e+06	4.17029e+06	3.08267e+06	4.14047e+06	2.78451e+06	FALSE	FALSE
CAH10_MOUSE	1.31619	0.368951	-0.462945	157498	137605	115942	174042	175075	217449	FALSE	FALSE
AMPN_MOUSE	1.31461	0.368205	-0.604905	161936	118648	156100	192376	272672	199098	FALSE	FALSE
FRIL2_MOUSE;FRIL1_MOUSE	1.31413	0.368205	-0.795798	3.04216e+06	2.7493e+06	3.91037e+06	4.35647e+06	7.44498e+06	5.04131e+06	FALSE	FALSE
CALY_MOUSE	1.31015	0.366542	-0.376846	119587	136330	97771	153145	152897	153222	FALSE	FALSE
COQ3_MOUSE	1.30882	0.366542	-0.368395	486693	617038	500157	647532	656590	766364	FALSE	FALSE
PRPS2_MOUSE	1.30874	0.366542	-0.334648	626746	530089	598433	712357	832986	668172	FALSE	FALSE
CXA1_MOUSE	1.30863	0.366542	0.432921	6.56283e+06	6.97049e+06	8.94765e+06	6.00773e+06	5.49327e+06	5.15203e+06	FALSE	FALSE
SFXN3_MOUSE	1.30781	0.366487	-0.370969	6.37743e+06	5.53778e+06	7.45638e+06	7.77902e+06	8.38088e+06	8.89186e+06	FALSE	FALSE
CCD22_MOUSE	1.30663	0.366487	0.309611	308259	344708	290383	262338	225419	273392	FALSE	FALSE
ELAV1_MOUSE	1.30575	0.366333	-0.35663	2.03424e+06	1.79432e+06	1.97382e+06	2.26892e+06	2.28256e+06	2.87808e+06	FALSE	FALSE
RAB36_MOUSE	1.30494	0.366231	-0.436289	25270.1	34666.3	32600.5	46004	38240.3	40970.2	FALSE	FALSE
MYD88_MOUSE	1.30436	0.366231	-2.99751	181.014	6225.57	1298.13	15674.5	25650.1	20228	FALSE	FALSE
NED4L_MOUSE	1.3022	0.365326	-0.308189	699562	590593	635625	815637	861427	707345	FALSE	FALSE
ADAS_MOUSE	1.30151	0.365326	0.342603	123232	127000	105258	90451.7	84903	104991	FALSE	FALSE
M3K7_MOUSE	1.30125	0.365326	-4.17243	0	0	912.151	4257.01	6848.51	5392.85	TRUE	FALSE

## Sheet: Additional Table 5
Female GO-MF
Highlighted = Top 10
Category	Term	Count	%	PValue	Genes				Fold Enrichment
GOTERM_MF_DIRECT	GO:0005515~protein binding	165	29.517	9.01096e-09	F6VSK8_MOUSE, MYD88_MOUSE, G3UXY0_MOUSE, F6U8T2_MOUSE, TSC1_MOUSE, A0A087WQ92_MOUSE, B9EKC0_MOUSE, Q3TWK2_MOUSE, F8VPQ4_MOUSE, Q3SYI6_MOUSE, F6VU53_MOUSE, Q3TA05_MOUSE, Q8C8D9_MOUSE, D3Z549_MOUSE, Q3UJV2_MOUSE, E9Q0P6_MOUSE, Q921J3_MOUSE, Q91X22_MOUSE, Q8C3Z4_MOUSE, B2RXM7_MOUSE, A2AL81_MOUSE, Q811G2_MOUSE, H3BJG6_MOUSE, A8CVP1_MOUSE, Q8BTL4_MOUSE, CLAP2_MOUSE, M0QW59_MOUSE, A0A0R4J2A6_MOUSE, Q3T…				1.49356
GOTERM_MF_DIRECT	GO:0032403~protein complex binding	30	5.36673	1.46429e-07	F6Y3V0_MOUSE, PTPRF_MOUSE, F6VSK8_MOUSE, TF65_MOUSE, Q8BNH0_MOUSE, H3BKR2_MOUSE, A2ACM0_MOUSE, B7ZD29_MOUSE, A0A0A6YVN9_MOUSE, RBM10_MOUSE, Q3TQ70_MOUSE, Q8K0N2_MOUSE, F7B6I3_MOUSE, F6U8T2_MOUSE, Q61621_MOUSE, Q8CC06_MOUSE, GBB2_MOUSE, Q80XR8_MOUSE, LCA5_MOUSE, Q3TMI0_MOUSE, Q3TWK2_MOUSE, A2AUX5_MOUSE, Q60818_MOUSE, Q3U2F9_MOUSE, Q3UEX1_MOUSE, Q4U1Z0_MOUSE, D3Z1M1_MOUSE, Q5DU47_MOUSE, NDUA9_MOUSE…				3.10394
GOTERM_MF_DIRECT	GO:0019904~protein domain specific binding	25	4.47227	1.1313e-06	Q0PD54_MOUSE, DLGP4_MOUSE, A0A140LHX7_MOUSE, RB27A_MOUSE, G3UWU5_MOUSE, Q544U7_MOUSE, A0A087WQM2_MOUSE, A0A0A7NQN9_MOUSE, Q3UXX9_MOUSE, CHM1A_MOUSE, E41L5_MOUSE, Q3UCF7_MOUSE, G3UZX4_MOUSE, Q3TXP6_MOUSE, Q3TJP4_MOUSE, Q3U5I5_MOUSE, Q9CT18_MOUSE, H3BJD4_MOUSE, B1AQX8_MOUSE, Q05D38_MOUSE, Q3TLY3_MOUSE, A8IP69_MOUSE, PP2AA_MOUSE, A0A0G2JGR0_MOUSE, A0A0A6YWX5_MOUSE, D3Z0U6_MOUSE, C7TQ56_MOUSE, Q8BPH1…				3.20418
GOTERM_MF_DIRECT	GO:0098641~cadherin binding involved in cell-cell adhesion	24	4.29338	2.14408e-06	F6VSK8_MOUSE, Q8BNH0_MOUSE, B7ZD29_MOUSE, Q6P247_MOUSE, F7CUV7_MOUSE, A2AQW2_MOUSE, Q05BE7_MOUSE, F7CD65_MOUSE, V9GX76_MOUSE, D3Z7I6_MOUSE, Q8CC06_MOUSE, RACK1_MOUSE, I7HJS1_MOUSE, CAZA1_MOUSE, FMNL2_MOUSE, Q3TMI0_MOUSE, A2AUX5_MOUSE, Q3U902_MOUSE, Q3TWK2_MOUSE, A2AKJ9_MOUSE, F6VU53_MOUSE, H3BLG5_MOUSE, D3Z549_MOUSE, Q811S2_MOUSE, Q3UQ26_MOUSE, Q3TPY5_MOUSE, Q8BI52_MOUSE, A2AKJ6_MOUSE, Q3UJV2_MOU…				3.18627
GOTERM_MF_DIRECT	GO:0016491~oxidoreductase activity	38	6.79785	3.07824e-06	Q6P8S1_MOUSE, A0ZNJ2_MOUSE, A2AQZ5_MOUSE, ALD1_MOUSE, Q3TX25_MOUSE, GRHPR_MOUSE, AKCL2_MOUSE, A2AL76_MOUSE, Q9CR06_MOUSE, D6RGB1_MOUSE, Q99KV3_MOUSE, DECR_MOUSE, PLOD3_MOUSE, GMPR1_MOUSE, AL3B2_MOUSE, Q569U9_MOUSE, A2ABZ2_MOUSE, ARK72_MOUSE, A0A0N4SWC9_MOUSE, B0R075_MOUSE, D6RIQ3_MOUSE, P5CR1_MOUSE, Q9CY59_MOUSE, A2AQZ2_MOUSE, AK1CD_MOUSE, Q8C715_MOUSE, Q5U415_MOUSE, MDHM_MOUSE, A2AL81_MOUSE, F6W…				2.33035
GOTERM_MF_DIRECT	GO:0000166~nucleotide binding	82	14.6691	3.57729e-05	RAB30_MOUSE, SYIC_MOUSE, B9EKC0_MOUSE, G5E8T6_MOUSE, Q3TX82_MOUSE, XRP2_MOUSE, Q8C7V6_MOUSE, PUR4_MOUSE, F6VU53_MOUSE, D3Z5V5_MOUSE, A0A0R4J0S6_MOUSE, G3UY86_MOUSE, Q4KL64_MOUSE, A1YYM5_MOUSE, Q3UR47_MOUSE, Q0VEE0_MOUSE, TAOK2_MOUSE, H3BKZ2_MOUSE, Q8C3Z4_MOUSE, Q3TZE1_MOUSE, NUBPL_MOUSE, SRSF1_MOUSE, M0QW59_MOUSE, Q3TIG8_MOUSE, Q3TIK8_MOUSE, Q3TJG7_MOUSE, Q3UJN2_MOUSE, Q3TQJ1_MOUSE, H3BKD8_MOUSE,…				1.56886
GOTERM_MF_DIRECT	GO:0016787~hydrolase activity	68	12.1646	5.13263e-05	CATZ_MOUSE, DESI1_MOUSE, A0A087WRE0_MOUSE, E9Q0X0_MOUSE, Q3TAV0_MOUSE, Q3TTA8_MOUSE, D6RCJ1_MOUSE, Q9Z2S5_MOUSE, D3Z2X5_MOUSE, A0A087WQ92_MOUSE, Q3U6J9_MOUSE, XRN2_MOUSE, Q3UJF1_MOUSE, PLCX3_MOUSE, Q8C7V6_MOUSE, F6XUR8_MOUSE, SIR5_MOUSE, DCPS_MOUSE, Q3TA05_MOUSE, F7B2N8_MOUSE, D3Z2Y2_MOUSE, PPAL_MOUSE, IMPA1_MOUSE, G3V016_MOUSE, Q0VEE0_MOUSE, Q52L53_MOUSE, Q8BTA2_MOUSE, E9Q0P6_MOUSE, Q3TCG9_MOUSE…				1.64302
GOTERM_MF_DIRECT	GO:0042802~identical protein binding	35	6.26118	8.69814e-05	TF65_MOUSE, MYD88_MOUSE, Q0PM15_MOUSE, B7ZCD3_MOUSE, B7ZD29_MOUSE, Q3U7M4_MOUSE, RBM10_MOUSE, G3UWU5_MOUSE, D3YYC2_MOUSE, D3Z2X5_MOUSE, A0A0N4SW89_MOUSE, G3UXH5_MOUSE, CHM1A_MOUSE, Q3U902_MOUSE, A2AUX5_MOUSE, A0A087WNX9_MOUSE, STIM1_MOUSE, Q60818_MOUSE, A2ABZ2_MOUSE, A2AKJ9_MOUSE, A0A0N4SWC9_MOUSE, G3UZX4_MOUSE, E3SRG9_MOUSE, Q3U5I5_MOUSE, Q3TIB3_MOUSE, P5CR1_MOUSE, D3Z7E6_MOUSE, Q811W8_MOUSE, H3…				2.07426
GOTERM_MF_DIRECT	GO:0051287~NAD binding	9	1.61002	0.000104711	Q9CYT3_MOUSE, MDHC_MOUSE, A0ZNJ2_MOUSE, Q5M8R7_MOUSE, GRHPR_MOUSE, B1AXQ0_MOUSE, G3P_MOUSE, Q4FJK3_MOUSE, F2Z456_MOUSE, LDHB_MOUSE, D3YTK6_MOUSE, A0A0R4J0X7_MOUSE, Q3V2I5_MOUSE, A0A0N4SWC9_MOUSE, B1ATQ3_MOUSE, B0R075_MOUSE, D6REG4_MOUSE, A2AFQ2_MOUSE, Q9CY59_MOUSE, SIR3_MOUSE, D3YWD6_MOUSE, NB5R3_MOUSE, Q99N15_MOUSE, 3HIDH_MOUSE, S4R2L8_MOUSE, HCD2_MOUSE, S4R2G5_MOUSE, D2KHZ9_MOUSE, D3YVQ5_MOUSE,…				6.06115
GOTERM_MF_DIRECT	GO:0003824~catalytic activity	29	5.18784	0.00011171	Q3TPB5_MOUSE, Q3TVF4_MOUSE, PYC_MOUSE, Q3THN2_MOUSE, A0A0N4SWD1_MOUSE, Q99KV3_MOUSE, Q8BP54_MOUSE, G5E8R3_MOUSE, GMPR1_MOUSE, ISOC1_MOUSE, Q3TVV7_MOUSE, A0A0N4SWC9_MOUSE, A0A0N4SVW1_MOUSE, SUCB2_MOUSE, DCPS_MOUSE, Q3TEG5_MOUSE, Q1RMY2_MOUSE, A0A140LHU1_MOUSE, A0A0G2JFL8_MOUSE, MDHM_MOUSE, F6R307_MOUSE, A0A0N4SUT8_MOUSE, HMGCL_MOUSE, PGTB2_MOUSE, Q3TN39_MOUSE, Q3TYS9_MOUSE, Q3U144_MOUSE, E9PZI0_MO…				2.24253
GOTERM_MF_DIRECT	GO:0019901~protein kinase binding	27	4.83005	0.000130891	TF65_MOUSE, A2ACM0_MOUSE, Q543F6_MOUSE, B7ZD29_MOUSE, Q2M4I9_MOUSE, P70273_MOUSE, A0A140LHX7_MOUSE, B7ZDF4_MOUSE, F7B6I3_MOUSE, Q9Z2S5_MOUSE, A0A087WQ92_MOUSE, Q8BP44_MOUSE, A0A087WQM2_MOUSE, A0A0A7NQN9_MOUSE, Q3UJF1_MOUSE, Q3TX82_MOUSE, A2AUX5_MOUSE, Q3TXP6_MOUSE, Q3TJP4_MOUSE, Q3U5I5_MOUSE, D3Z5V5_MOUSE, B1AQX8_MOUSE, A0A0R4J005_MOUSE, Q3TLY3_MOUSE, D3YYT0_MOUSE, G3V016_MOUSE, Q3U2E0_MOUSE, PP2…				2.30435
GOTERM_MF_DIRECT	GO:0019003~GDP binding	9	1.61002	0.00019565	B2RPS1_MOUSE, Q8CCG5_MOUSE, Q4VA90_MOUSE, PRPS2_MOUSE, Q549X4_MOUSE, A0A0N4SWD1_MOUSE, Q9CZQ8_MOUSE, RB27A_MOUSE, Q8C458_MOUSE, Q544U7_MOUSE, A0A0G2JEF1_MOUSE, RALA_MOUSE, F6QC68_MOUSE, RAB28_MOUSE, Q3UZR8_MOUSE, Q3TWY9_MOUSE, SUCB2_MOUSE, D3YZ05_MOUSE, Q3TTF7_MOUSE, RAB5B_MOUSE, EI2BA_MOUSE, Q9CXY0_MOUSE, A0A0J9YV85_MOUSE, Q05D38_MOUSE, C6EQH3_MOUSE, D3Z151_MOUSE, RALB_MOUSE, D6RI38_MOUSE, RB27B…				5.55605
GOTERM_MF_DIRECT	GO:0030971~receptor tyrosine kinase binding	8	1.43113	0.000409002	F6Y3V0_MOUSE, PTPRF_MOUSE, Q3U126_MOUSE, G3UXP4_MOUSE, F6SLL0_MOUSE, PCNA_MOUSE, Q2M4I9_MOUSE, Q3TP56_MOUSE, Q3V0J9_MOUSE, Q63848_MOUSE, Q3TP23_MOUSE, Q9Z2S5_MOUSE, E9Q310_MOUSE, A0A087WQM2_MOUSE, RACK1_MOUSE, P70305_MOUSE, D3Z280_MOUSE, Q3TUJ5_MOUSE, Q4U1Z0_MOUSE, Q9CT18_MOUSE, PLCG1_MOUSE, F6S1X8_MOUSE, Q06VW2_MOUSE, G3V016_MOUSE, A8IP69_MOUSE, Q9CZD6_MOUSE, A2A4A6_MOUSE, Q4JFB8_MOUSE, Q3U2M7_M…				5.81025
GOTERM_MF_DIRECT	GO:0016208~AMP binding	5	0.894454	0.000419929	Q3TMN8_MOUSE, APT_MOUSE, D3Z5V5_MOUSE, Q2VPC9_MOUSE, Q8BM63_MOUSE, D3YYW4_MOUSE, PRPS2_MOUSE, Q8BIQ9_MOUSE, Q9CY59_MOUSE, NB5R3_MOUSE, F2Z456_MOUSE, Q3TWR3_MOUSE, AAKG2_MOUSE, AAKG1_MOUSE, D3YUS1_MOUSE, A0A0A0MQM3_MOUSE, Q3U4D5_MOUSE				13.2287
GOTERM_MF_DIRECT	GO:0044822~poly(A) RNA binding	50	8.94454	0.000481999	E9Q6M7_MOUSE, KC1E_MOUSE, A0A0G2JH09_MOUSE, CSRP1_MOUSE, Q8C2Q8_MOUSE, NCBP3_MOUSE, Q9CZR7_MOUSE, A8WHM8_MOUSE, XRN2_MOUSE, Q8BPF7_MOUSE, F6Z9T5_MOUSE, Q3UT88_MOUSE, E9PZ57_MOUSE, A2AKV3_MOUSE, SRSF7_MOUSE, A0A0G2JFH2_MOUSE, A8IP69_MOUSE, F6TDX7_MOUSE, MDHM_MOUSE, B2RXM7_MOUSE, Q8BPH1_MOUSE, SRSF1_MOUSE, Q3UFF9_MOUSE, Q3TN39_MOUSE, Q3TIK8_MOUSE, Q9CYT3_MOUSE, SARNP_MOUSE, E9QNR6_MOUSE, A0A087WQY9…				1.66399
GOTERM_MF_DIRECT	GO:0016301~kinase activity	34	6.08229	0.000725284	KC1E_MOUSE, F6U8T2_MOUSE, A0A087WQM2_MOUSE, G5E8T6_MOUSE, Q3TX82_MOUSE, A1YYN2_MOUSE, Q3UXE9_MOUSE, G3UZX4_MOUSE, Q3U1V3_MOUSE, F6VU53_MOUSE, D3Z5V5_MOUSE, Q5DU47_MOUSE, A1YYM5_MOUSE, Q3UR47_MOUSE, J3QK07_MOUSE, Q3UPI3_MOUSE, TAOK2_MOUSE, H3BKZ2_MOUSE, Q8C3Z4_MOUSE, Q3TZE1_MOUSE, CDK5_MOUSE, Q3UGB1_MOUSE, Q8BFX6_MOUSE, M0QW59_MOUSE, Q3TJG7_MOUSE, Q3TQJ1_MOUSE, Q3TMN8_MOUSE, H3BKD8_MOUSE, E9QK53_M…				1.8685
GOTERM_MF_DIRECT	GO:0043531~ADP binding	6	1.07335	0.00262859	Q3UJN2_MOUSE, Q3TMN8_MOUSE, D3Z5V5_MOUSE, Q2VPC9_MOUSE, Q8BM63_MOUSE, D3YYW4_MOUSE, PRPS2_MOUSE, Q8BIQ9_MOUSE, Q9CY59_MOUSE, NB5R3_MOUSE, F2Z456_MOUSE, Q3TSQ7_MOUSE, Q3TWR3_MOUSE, AAKG2_MOUSE, DHE3_MOUSE, RUVB1_MOUSE, Q3U1C2_MOUSE, F7CFA5_MOUSE, AAKG1_MOUSE, D3YUS1_MOUSE, A0A0A0MQM3_MOUSE, Q3U4D5_MOUSE, D3YW60_MOUSE				6.17339
GOTERM_MF_DIRECT	GO:0004722~protein serine/threonine phosphatase activity	7	1.25224	0.00291125	TIM50_MOUSE, Q8VED4_MOUSE, A0A0G2JF34_MOUSE, A0A0G2JFF1_MOUSE, PP2BB_MOUSE, A0A0G2JGC1_MOUSE, E9Q6P2_MOUSE, Q6ZWM8_MOUSE, A0A0N4SVL9_MOUSE, Q8BN07_MOUSE, PP2AB_MOUSE, Q3UXV4_MOUSE, Q8BT83_MOUSE, Q9CVB2_MOUSE, A0A0N4SVE2_MOUSE, A0A0N4SW66_MOUSE, PPP6_MOUSE, E0CZ78_MOUSE, Q1RMY2_MOUSE, G3X8U7_MOUSE, PP2AA_MOUSE, Q9CV62_MOUSE, TAB1_MOUSE, PP1G_MOUSE, A0A0G2JE42_MOUSE, A0A0G2JEB0_MOUSE				4.89212
GOTERM_MF_DIRECT	GO:0004032~alditol:NADP+ 1-oxidoreductase activity	4	0.715564	0.00356509	ARK72_MOUSE, Q3UGS8_MOUSE, Q3UDY1_MOUSE, ALD2_MOUSE, Q5U415_MOUSE, ALD1_MOUSE, Q3TCL2_MOUSE, ALDR_MOUSE, D3YVJ7_MOUSE, Q3ULP0_MOUSE, Q5M9J9_MOUSE				12.3468
GOTERM_MF_DIRECT	GO:0004735~pyrroline-5-carboxylate reductase activity	3	0.536673	0.00419176	A2ABZ2_MOUSE, Q3TMZ1_MOUSE, P5CR1_MOUSE, A2ABZ3_MOUSE, P5CR3_MOUSE, A2ABZ0_MOUSE, Q3TJ21_MOUSE, Q3UTR5_MOUSE, P5CR2_MOUSE				27.7803
GOTERM_MF_DIRECT	GO:0004721~phosphoprotein phosphatase activity	11	1.9678	0.00442929	F6Y3V0_MOUSE, PTPRF_MOUSE, TIM50_MOUSE, Q8VED4_MOUSE, A0A0G2JF34_MOUSE, Q3TT24_MOUSE, A0A0G2JFF1_MOUSE, PP2BB_MOUSE, A0A0G2JGC1_MOUSE, Q3U4F3_MOUSE, E9Q6P2_MOUSE, Q3V0J9_MOUSE, Q6ZWM8_MOUSE, A0A0N4SVL9_MOUSE, PLPP_MOUSE, Q63848_MOUSE, Q8BN07_MOUSE, Q64696_MOUSE, PP2AB_MOUSE, Q3UXV4_MOUSE, MYPT1_MOUSE, Q5U5Y4_MOUSE, Q4U1Z0_MOUSE, Q8BT83_MOUSE, Q05C78_MOUSE, PTN11_MOUSE, Q9CT18_MOUSE, F6S1X8_MOUSE,…				2.93125
GOTERM_MF_DIRECT	GO:0070403~NAD+ binding	4	0.715564	0.00454269	CRYL1_MOUSE, SIR5_MOUSE, SIR3_MOUSE, D3YWD6_MOUSE, Q4FJK3_MOUSE, Q3TSQ7_MOUSE, Q9D221_MOUSE, Q5M8R0_MOUSE, A7VMV2_MOUSE, DHE3_MOUSE, F7CFA5_MOUSE, D3YTK6_MOUSE, D3YVQ5_MOUSE				11.397
GOTERM_MF_DIRECT	GO:0005096~GTPase activator activity	15	2.68336	0.00475517	Q91Z68_MOUSE, F6Y0W2_MOUSE, Q8C5F3_MOUSE, F8VQ11_MOUSE, RB3GP_MOUSE, B7ZD29_MOUSE, F6WTE9_MOUSE, Q8BR34_MOUSE, E9PVA6_MOUSE, G5E8E0_MOUSE, RHG17_MOUSE, SRGP3_MOUSE, F6U8T2_MOUSE, D6RDE3_MOUSE, RASL2_MOUSE, Q3TGN4_MOUSE, Q80XR8_MOUSE, A2AUX5_MOUSE, XRP2_MOUSE, F6WV69_MOUSE, F6QQP6_MOUSE, A0A0U1RNM6_MOUSE, F8VPQ4_MOUSE, G3UWM5_MOUSE, B7ZCJ0_MOUSE, F7D9F7_MOUSE, Q3UR67_MOUSE, ASAP2_MOUSE, B2RWX1_MOU…				2.36428
GOTERM_MF_DIRECT	GO:0003779~actin binding	19	3.39893	0.00485022	D6RHT2_MOUSE, O08548_MOUSE, Q6P247_MOUSE, A2AQW2_MOUSE, Q9CRE1_MOUSE, F6X3N8_MOUSE, D3YWC9_MOUSE, V9GX76_MOUSE, Q8CG29_MOUSE, I7HJS1_MOUSE, CAZA1_MOUSE, F6W1Y9_MOUSE, FMNL2_MOUSE, XRP2_MOUSE, Q6ZQ77_MOUSE, A0A0G2JFU3_MOUSE, V6BQR3_MOUSE, E9Q3C5_MOUSE, D3Z589_MOUSE, LIMC1_MOUSE, A8IP69_MOUSE, D6RCW7_MOUSE, Q8BI52_MOUSE, Q3UJV2_MOUSE, A0A0G2JE27_MOUSE, F7D291_MOUSE, MTSSL_MOUSE, IMPCT_MOUSE, A0A0A0…				2.08215
GOTERM_MF_DIRECT	GO:0050811~GABA receptor binding	4	0.715564	0.00566708	PCID2_MOUSE, PP2AA_MOUSE, A0JLQ7_MOUSE, H3BIV5_MOUSE, Q8BNM3_MOUSE, PLCL1_MOUSE, E9Q1H5_MOUSE, F6QZZ3_MOUSE, E9Q5V9_MOUSE, AKAP5_MOUSE				10.583
GOTERM_MF_DIRECT	GO:0000175~3'-5'-exoribonuclease activity	4	0.715564	0.00566708	Q3V476_MOUSE, Q3TAV0_MOUSE, Q3TLK9_MOUSE, Q3UNL5_MOUSE, Q8BJ91_MOUSE, Q3UD20_MOUSE, Q543X5_MOUSE, ORN_MOUSE, Q3T9B4_MOUSE, XRN2_MOUSE, PNPT1_MOUSE, Q3V231_MOUSE, Q3TST0_MOUSE, CNOT7_MOUSE, Q78KL9_MOUSE, Q3TN29_MOUSE				10.583
GOTERM_MF_DIRECT	GO:0005546~phosphatidylinositol-4,5-bisphosphate binding	7	1.25224	0.00588199	F6R7T6_MOUSE, Q3TP89_MOUSE, CAPS1_MOUSE, F6S054_MOUSE, Q80WG6_MOUSE, K4DI76_MOUSE, MTSSL_MOUSE, Q05DG3_MOUSE, HIP1R_MOUSE, AMER2_MOUSE, D3YWC9_MOUSE, J3QJW3_MOUSE, Q9D689_MOUSE, G5DDB7_MOUSE, B8JJC6_MOUSE, Q8BPA2_MOUSE, F7DCR9_MOUSE, Q6P1F5_MOUSE, Q8K0Y6_MOUSE, Q6ZQ77_MOUSE, A0A0G2JFU3_MOUSE, APBA1_MOUSE, E9Q3C5_MOUSE, Q3UH26_MOUSE, PLCD1_MOUSE, F7D291_MOUSE, A0A0R4J030_MOUSE, F7BGL3_MOUSE, Q80UP…				4.25053
GOTERM_MF_DIRECT	GO:0005007~fibroblast growth factor-activated receptor activity	3	0.536673	0.00686188	A1YYN6_MOUSE, E9Q700_MOUSE, A1YYM6_MOUSE, E9PXV8_MOUSE, A0A0J9YUX1_MOUSE, E9Q7E6_MOUSE, A0A0J9YU20_MOUSE, FGFR3_MOUSE, E9PX67_MOUSE, E9QNJ9_MOUSE, A1YYN2_MOUSE, Q60818_MOUSE, A1YYN0_MOUSE, J3QN85_MOUSE, A1YYM7_MOUSE, F2Z480_MOUSE, D6RJK5_MOUSE, A1YYM5_MOUSE, E9PX60_MOUSE, A1YYP0_MOUSE, A1YYN9_MOUSE, E9Q7T0_MOUSE, E9Q5C2_MOUSE, A1YYN3_MOUSE, E9Q7E8_MOUSE, Q61565_MOUSE, Q3TQJ1_MOUSE, F6TK14_MOUSE, …				22.2242
GOTERM_MF_DIRECT	GO:0046875~ephrin receptor binding	5	0.894454	0.00724195	Q8BZM2_MOUSE, Q3U1Q4_MOUSE, Q543F6_MOUSE, A0A0R4J2A8_MOUSE, Q3U902_MOUSE, A2AKJ9_MOUSE, Q3U6J5_MOUSE, Q3U5I5_MOUSE, Q3TXC7_MOUSE, ANS1B_MOUSE, SDCB1_MOUSE, S4R2H2_MOUSE, H3BLG5_MOUSE, S4R2E7_MOUSE, Q3TWV1_MOUSE, K4DI73_MOUSE, Q3UC68_MOUSE, A2AKJ6_MOUSE, Q3TET7_MOUSE, CDK5_MOUSE, S4R2H8_MOUSE, Q3U6Q3_MOUSE, B1AT95_MOUSE, S4R1G5_MOUSE, A0A0R4J2A6_MOUSE, S4R2B3_MOUSE, E9QPP6_MOUSE, B1AT92_MOUSE, S4R…				6.38627
GOTERM_MF_DIRECT	GO:0050733~RS domain binding	3	0.536673	0.01011	G3UW94_MOUSE, F7AI47_MOUSE, B2RXM7_MOUSE, SARNP_MOUSE, Q14C24_MOUSE, SRSF1_MOUSE, U2AF1_MOUSE, H7BX95_MOUSE, F6QXN3_MOUSE, B7ZWI2_MOUSE				18.5202
GOTERM_MF_DIRECT	GO:0005168~neurotrophin TRKA receptor binding	3	0.536673	0.01011	Q3TUJ5_MOUSE, G3UXP4_MOUSE, Q3U1Q4_MOUSE, Q3U5I5_MOUSE, PLCG1_MOUSE, B1AT92_MOUSE, F6SLL0_MOUSE, P85A_MOUSE, Q80UI5_MOUSE, Q3TE89_MOUSE, Q2M4I9_MOUSE, GRB2_MOUSE, G3V016_MOUSE, A2A4A6_MOUSE, Q3TP23_MOUSE, Q9Z2S5_MOUSE, A0A087WQM2_MOUSE, Q99LY6_MOUSE, P70305_MOUSE, B1AT95_MOUSE, P70304_MOUSE, Q3UZ68_MOUSE, Q8C7P2_MOUSE				18.5202
GOTERM_MF_DIRECT	GO:0016616~oxidoreductase activity, acting on the CH-OH group of donors, NAD or NADP as acceptor	5	0.894454	0.0102926	ARK72_MOUSE, A0A0N4SWC9_MOUSE, MDHC_MOUSE, B1ATQ3_MOUSE, B0R075_MOUSE, D6REG4_MOUSE, J3QMC8_MOUSE, Q5M8R7_MOUSE, A0A0G2JF23_MOUSE, GRHPR_MOUSE, B1AXQ0_MOUSE, LDHB_MOUSE, MDHM_MOUSE, A0A0G2JGY4_MOUSE, D3Z7F0_MOUSE, A0A0N4SVV8_MOUSE, Q3T9Z2_MOUSE				5.78755
GOTERM_MF_DIRECT	GO:0032794~GTPase activating protein binding	4	0.715564	0.0117305	O08548_MOUSE, B2RWT9_MOUSE, Q8BQP0_MOUSE, F2Z3W0_MOUSE, D3YUD0_MOUSE, Q05DG3_MOUSE, F2Z3X2_MOUSE, D3Z7A7_MOUSE, TSC1_MOUSE, PLCD1_MOUSE, A0A0G2JDM9_MOUSE, Q8K364_MOUSE, PLXB1_MOUSE, G5DDB7_MOUSE, FMNL3_MOUSE				8.23119
GOTERM_MF_DIRECT	GO:0003723~RNA binding	33	5.9034	0.0121588	E9Q6M7_MOUSE, Q3UHW0_MOUSE, Q8BNM3_MOUSE, A2ASC6_MOUSE, Q3T9M5_MOUSE, RBM10_MOUSE, C0IMX1_MOUSE, NCBP3_MOUSE, G3UW94_MOUSE, Q3TRI4_MOUSE, Q9CZR7_MOUSE, A8WHM8_MOUSE, Q8BPF7_MOUSE, F6QZZ3_MOUSE, E9Q5V9_MOUSE, Q3UT88_MOUSE, A0JLQ7_MOUSE, D6RFT3_MOUSE, SRSF7_MOUSE, Q4KL64_MOUSE, Q3TEG5_MOUSE, Q3TUZ1_MOUSE, Q3U4T5_MOUSE, SRRM4_MOUSE, G3X9I4_MOUSE, D3Z5P5_MOUSE, B1B1D7_MOUSE, Q5EBP8_MOUSE, F6R307_MOUS…				1.56709
GOTERM_MF_DIRECT	GO:0016829~lyase activity	10	1.78891	0.013042	A0A0N4SV34_MOUSE, NPL_MOUSE, Q544K9_MOUSE, E9QMT1_MOUSE, E9Q242_MOUSE, E9PZI0_MOUSE, F6RT60_MOUSE, F7AFM3_MOUSE, A0A0N4SUV7_MOUSE, PGES2_MOUSE, AUHM_MOUSE, Q3THN2_MOUSE, Q3UMP2_MOUSE, A0A0A6YWP8_MOUSE, UMPS_MOUSE, E0CXS3_MOUSE, PUR8_MOUSE, THNS2_MOUSE, D6RJ62_MOUSE, E9Q0A0_MOUSE, Q3TVV7_MOUSE, A0A0N4SVB4_MOUSE, MTNB_MOUSE, A0A0N4SVW1_MOUSE, ECHD1_MOUSE, E9Q6L3_MOUSE, DEOC_MOUSE, A0A0R4J1L8_MOUSE,…				2.66477
GOTERM_MF_DIRECT	GO:0070006~metalloaminopeptidase activity	4	0.715564	0.0136559	AMPE_MOUSE, A0A087WS31_MOUSE, Q3TTA8_MOUSE, Q6NY09_MOUSE, Q8BPW9_MOUSE, AMPN_MOUSE, A0A0U1RNS3_MOUSE, DNPEP_MOUSE, F6YHW2_MOUSE, Q52JJ6_MOUSE, Q8CD51_MOUSE, A0A087WSU0_MOUSE, Q8BZ14_MOUSE, A0A087WRC1_MOUSE, A0A087WSE6_MOUSE, Q3TA05_MOUSE, F7B9G4_MOUSE, Q3UP74_MOUSE, A0A0U1RPR2_MOUSE, A0A087WSD3_MOUSE, A0A087WNX3_MOUSE, LCAP_MOUSE, Q8CAJ7_MOUSE, Q3TB69_MOUSE, Q6P3C1_MOUSE, Q3TVK3_MOUSE				7.79797
GOTERM_MF_DIRECT	GO:0047485~protein N-terminus binding	9	1.61002	0.013866	TF65_MOUSE, F6Y0W2_MOUSE, B7ZD29_MOUSE, A0A0G2JFF1_MOUSE, A0A0G2JFE1_MOUSE, C0IMX1_MOUSE, A0A0G2JEE6_MOUSE, TSC1_MOUSE, D6RDE3_MOUSE, Q3UXX9_MOUSE, A2AUX5_MOUSE, Q3U902_MOUSE, F6QQP6_MOUSE, A2AKJ9_MOUSE, Q3U6J5_MOUSE, Q8BQP0_MOUSE, F2Z3W0_MOUSE, F6RK07_MOUSE, Q3TXC7_MOUSE, Q3U3Q8_MOUSE, SDCB1_MOUSE, F2Z3X2_MOUSE, A0A0G2JGG5_MOUSE, H3BLG5_MOUSE, Q8R5I5_MOUSE, Q3TWV1_MOUSE, Q3UC68_MOUSE, A2AKJ6_MOU…				2.84926
GOTERM_MF_DIRECT	GO:0003729~mRNA binding	10	1.78891	0.0148261	MECP2_MOUSE, Q8C2Y9_MOUSE, CPSF5_MOUSE, XPO5_MOUSE, Q8C839_MOUSE, Q8BVF8_MOUSE, Q3TLD7_MOUSE, Q3TS82_MOUSE, Q6ZPH0_MOUSE, F6QXN3_MOUSE, SF3B1_MOUSE, A2RRJ4_MOUSE, NCBP3_MOUSE, Q8BM84_MOUSE, RC3H1_MOUSE, J9QHX6_MOUSE, Q9CZR7_MOUSE, Q9CZQ0_MOUSE, G5E866_MOUSE, Q7TPS9_MOUSE, Q8BPF7_MOUSE, CSTF3_MOUSE, D3Z7U4_MOUSE, ELAV1_MOUSE, Q8CE71_MOUSE, Q3UT88_MOUSE, Q3US00_MOUSE, Q3TB51_MOUSE, Q8BW03_MOUSE, D3…				2.60847
GOTERM_MF_DIRECT	GO:0019899~enzyme binding	19	3.39893	0.0168375	TF65_MOUSE, Q3U1Q4_MOUSE, PCNA_MOUSE, D3YZI3_MOUSE, UBE4B_MOUSE, Q3V426_MOUSE, Q4FJK3_MOUSE, Q5SS40_MOUSE, Q3V453_MOUSE, F7CFA5_MOUSE, Q5SQG5_MOUSE, D3YTK6_MOUSE, RACK1_MOUSE, Q543K2_MOUSE, HDHD2_MOUSE, A3KMI8_MOUSE, Q3SYI6_MOUSE, Q3U5I5_MOUSE, Q3U3Q8_MOUSE, D3YUN7_MOUSE, RENR_MOUSE, D3YWD6_MOUSE, D3YYT0_MOUSE, E0CZ78_MOUSE, Q9CZD6_MOUSE, PP2AA_MOUSE, CNTP2_MOUSE, D3Z600_MOUSE, Q548Y4_MOUSE, Q8BP…				1.83273
GOTERM_MF_DIRECT	GO:0004708~MAP kinase kinase activity	3	0.536673	0.0229992	Q3TJG7_MOUSE, Q3UDI2_MOUSE, MP2K6_MOUSE, Q60521_MOUSE, A2AGS2_MOUSE, Q5SWN9_MOUSE, Q923A8_MOUSE, Q543Z5_MOUSE, A2AP93_MOUSE, Q543B5_MOUSE, P70273_MOUSE, Q3TXG1_MOUSE, MP2K3_MOUSE, Q3TLX7_MOUSE, Q8BP44_MOUSE, A2AP92_MOUSE, Q3TX82_MOUSE, M3K7_MOUSE, A0A0R4J1Q6_MOUSE, Q3UU57_MOUSE				12.3468
GOTERM_MF_DIRECT	GO:0004672~protein kinase activity	23	4.11449	0.0311554	KC1E_MOUSE, A0A0J9YUX1_MOUSE, Q543F6_MOUSE, P70273_MOUSE, A0A140LIY2_MOUSE, A0A0J9YU20_MOUSE, Q8BP44_MOUSE, Q3TX82_MOUSE, A1YYN2_MOUSE, Q60818_MOUSE, Q3U1V3_MOUSE, F6VU53_MOUSE, A1YYM7_MOUSE, A1YYM5_MOUSE, E9PX60_MOUSE, Q3UR47_MOUSE, Q3UPI3_MOUSE, TAOK2_MOUSE, Q3TZE1_MOUSE, E9Q7T0_MOUSE, CDK5_MOUSE, Q8BFX6_MOUSE, Q3V3V4_MOUSE, E9Q7E8_MOUSE, Q8C411_MOUSE, AAKG1_MOUSE, M0QW59_MOUSE, Q543G3_MOUSE, Q…				1.60438
GOTERM_MF_DIRECT	GO:0019903~protein phosphatase binding	7	1.25224	0.0314867	A0A0G2JF34_MOUSE, Q3U1Q4_MOUSE, B1AT92_MOUSE, A0A0G2JFF1_MOUSE, A0A0G2JGC1_MOUSE, D6REF3_MOUSE, Q6ZWM8_MOUSE, Q5SS40_MOUSE, Q3TP23_MOUSE, 1433E_MOUSE, Q3V453_MOUSE, A0A087WQM2_MOUSE, RACK1_MOUSE, Q99LY6_MOUSE, P70305_MOUSE, Q3U5I5_MOUSE, P85A_MOUSE, Q80UI5_MOUSE, F6WA09_MOUSE, GRB2_MOUSE, CADH2_MOUSE, D3YYT0_MOUSE, PP2AA_MOUSE, PP1G_MOUSE, Q8BPH1_MOUSE, A0A0G2JE42_MOUSE, A0A0G2JEB0_MOUSE, Q3UIC2_…				2.94639
GOTERM_MF_DIRECT	GO:0051117~ATPase binding	7	1.25224	0.0314867	Q0PD54_MOUSE, Q3UJN2_MOUSE, Q8CCG5_MOUSE, Q4FZG5_MOUSE, ARPC2_MOUSE, UBE4B_MOUSE, Q3V426_MOUSE, G3UZD6_MOUSE, G3UZM6_MOUSE, Q3TP23_MOUSE, D3YV69_MOUSE, RUVB1_MOUSE, A0A087WQM2_MOUSE, RALA_MOUSE, Q99LY6_MOUSE, P70305_MOUSE, A0A087WRT2_MOUSE, F6QC68_MOUSE, Q6NWW1_MOUSE, P85A_MOUSE, Q80UI5_MOUSE, Q9CXY0_MOUSE, H7BXC2_MOUSE, Q3UA52_MOUSE, RALB_MOUSE, D3YXG6_MOUSE, Q3U1C2_MOUSE, Q3U4W5_MOUSE, RAB6A_MO…				2.94639
GOTERM_MF_DIRECT	GO:0005525~GTP binding	18	3.22004	0.031684	Q0PD54_MOUSE, Q8CCG5_MOUSE, Q80SX7_MOUSE, F6Y6I9_MOUSE, Q9D372_MOUSE, E9Q0F8_MOUSE, M0QWL7_MOUSE, RAB30_MOUSE, Q549X4_MOUSE, Q0PD24_MOUSE, SRPRB_MOUSE, Q9D4I9_MOUSE, A0A0N4SWD1_MOUSE, RB27A_MOUSE, Q544U7_MOUSE, F7CFA5_MOUSE, RABL6_MOUSE, RAB23_MOUSE, D3YZ27_MOUSE, XRP2_MOUSE, Q3TWY9_MOUSE, SUCB2_MOUSE, D3YZ05_MOUSE, Q3TTF7_MOUSE, ARFRP_MOUSE, Q05D38_MOUSE, Q542X6_MOUSE, C6EQH3_MOUSE, D3Z151_MOUSE…				1.7408
GOTERM_MF_DIRECT	GO:0017134~fibroblast growth factor binding	4	0.715564	0.0319109	A1YYN6_MOUSE, E9Q700_MOUSE, A1YYM6_MOUSE, E9PXV8_MOUSE, A0A0J9YUX1_MOUSE, E9Q7E6_MOUSE, Q53WR6_MOUSE, A0A0J9YU20_MOUSE, FGFR3_MOUSE, E9PX67_MOUSE, Q3TMG0_MOUSE, E9QNJ9_MOUSE, A1YYN2_MOUSE, Q60818_MOUSE, GSLG1_MOUSE, A1YYN0_MOUSE, F8WHM5_MOUSE, J3QN85_MOUSE, A1YYM7_MOUSE, F2Z480_MOUSE, D6RJK5_MOUSE, A1YYM5_MOUSE, E9PX60_MOUSE, A1YYP0_MOUSE, A1YYN9_MOUSE, E9Q7T0_MOUSE, E9Q5C2_MOUSE, A1YYN3_MOUSE, E…				5.69851
GOTERM_MF_DIRECT	GO:0050321~tau-protein kinase activity	3	0.536673	0.033913	F6VU53_MOUSE, Q8BZE0_MOUSE, Q543F6_MOUSE, Q8C1L3_MOUSE, CDK5_MOUSE, MARK4_MOUSE, Q3USK2_MOUSE, Q3UBT6_MOUSE, A0A0G2JDL3_MOUSE, KC1D_MOUSE, F7A4U8_MOUSE, A0A140LIY2_MOUSE				10.1019
GOTERM_MF_DIRECT	GO:0031406~carboxylic acid binding	3	0.536673	0.033913	Q3T9S7_MOUSE, B0R075_MOUSE, D6REG4_MOUSE, PYC_MOUSE, GRHPR_MOUSE, B1AXQ0_MOUSE, Q62043_MOUSE, Q3UFS6_MOUSE, Q3UMP2_MOUSE, Q8BP54_MOUSE, G5E8R3_MOUSE, HMGCL_MOUSE, Q3TCQ3_MOUSE, E9QPD7_MOUSE, Q3T9Z2_MOUSE				10.1019
GOTERM_MF_DIRECT	GO:0043560~insulin receptor substrate binding	3	0.536673	0.033913	Q05C78_MOUSE, PTN11_MOUSE, Q3U1Q4_MOUSE, Q3U5I5_MOUSE, Q9CT18_MOUSE, B1AT92_MOUSE, P85A_MOUSE, Q80UI5_MOUSE, GRB2_MOUSE, Q63848_MOUSE, Q3TP23_MOUSE, A0A087WQM2_MOUSE, Q99LY6_MOUSE, P70305_MOUSE, B1AT95_MOUSE, P70304_MOUSE, Q8C7P2_MOUSE				10.1019
GOTERM_MF_DIRECT	GO:0004177~aminopeptidase activity	4	0.715564	0.038661	AMPE_MOUSE, A0A087WS31_MOUSE, Q3TTA8_MOUSE, Q6NY09_MOUSE, Q8BPW9_MOUSE, AMPN_MOUSE, A0A0U1RNS3_MOUSE, DNPEP_MOUSE, F6YHW2_MOUSE, Q52JJ6_MOUSE, Q8CD51_MOUSE, A0A087WSU0_MOUSE, Q8BZ14_MOUSE, A0A087WRC1_MOUSE, A0A087WSE6_MOUSE, Q3TA05_MOUSE, F7B9G4_MOUSE, Q3UP74_MOUSE, A0A0U1RPR2_MOUSE, A0A087WSD3_MOUSE, A0A087WNX3_MOUSE, LCAP_MOUSE, Q8CAJ7_MOUSE, Q3TB69_MOUSE, Q6P3C1_MOUSE, Q3TVK3_MOUSE				5.29148
GOTERM_MF_DIRECT	GO:0017124~SH3 domain binding	8	1.43113	0.0405085	F6Y0W2_MOUSE, Q3U1Q4_MOUSE, B7ZD29_MOUSE, HIP1R_MOUSE, RHG17_MOUSE, Q3TGN4_MOUSE, D6RDE3_MOUSE, Q3TIT7_MOUSE, A2AUX5_MOUSE, F6VMS8_MOUSE, F6QQP6_MOUSE, A0A0U1RNM6_MOUSE, Q6P1F5_MOUSE, Q8C8B2_MOUSE, Q6ZQ77_MOUSE, Q3TXP6_MOUSE, Q3TJP4_MOUSE, Q3U5I5_MOUSE, A0A0G2JFU3_MOUSE, F6RK07_MOUSE, E9Q3C5_MOUSE, Q3TJB5_MOUSE, Q3TLY3_MOUSE, Q3UQ26_MOUSE, A2ALX7_MOUSE, Q3TQM7_MOUSE, BCAR1_MOUSE, Q3U2G7_MOUSE, Q8…				2.51121
GOTERM_MF_DIRECT	GO:0042803~protein homodimerization activity	31	5.54562	0.0412024	TF65_MOUSE, B7ZD29_MOUSE, GRHPR_MOUSE, Q99KV3_MOUSE, RACK1_MOUSE, GSTM4_MOUSE, CHM1A_MOUSE, Q3U902_MOUSE, A2AUX5_MOUSE, A1YYN2_MOUSE, Q60818_MOUSE, A2AKJ9_MOUSE, B0R075_MOUSE, Q6ZQ77_MOUSE, A1YYM7_MOUSE, E3SRG9_MOUSE, A0A0G2JFU3_MOUSE, Q811W8_MOUSE, A1YYM5_MOUSE, H3BLG5_MOUSE, E9PX60_MOUSE, E9Q3C5_MOUSE, IMPA1_MOUSE, Q3TUZ1_MOUSE, Q8BTA2_MOUSE, A2AKJ6_MOUSE, Q3TZE1_MOUSE, Q548Y4_MOUSE, E9Q7T0_MOU…				1.43891
GOTERM_MF_DIRECT	GO:0004674~protein serine/threonine kinase activity	19	3.39893	0.0421922	KC1E_MOUSE, Q543M9_MOUSE, Q923A8_MOUSE, Q8BN81_MOUSE, Q543F6_MOUSE, Q3UF82_MOUSE, Q8C1L3_MOUSE, A5X3G4_MOUSE, Q543Z5_MOUSE, Q3TDI9_MOUSE, F6PZ73_MOUSE, KPCD1_MOUSE, P70273_MOUSE, MK01_MOUSE, E9PVB6_MOUSE, A0A140LIY2_MOUSE, Q8R2U8_MOUSE, E9Q9M2_MOUSE, Q3TLX7_MOUSE, Q9QUI3_MOUSE, Q8BP44_MOUSE, E9Q3I6_MOUSE, Q3TX82_MOUSE, KS6B1_MOUSE, MP2K6_MOUSE, Q60521_MOUSE, A2AGS2_MOUSE, Q3U1V3_MOUSE, F6VU53_MOU…				1.64431
GOTERM_MF_DIRECT	GO:0051020~GTPase binding	4	0.715564	0.0422863	H3BKR2_MOUSE, AIMP1_MOUSE, Q3UWS7_MOUSE, Q3TQ70_MOUSE, Q61621_MOUSE, A0A0G2JDW6_MOUSE, Q8C2U7_MOUSE, Q3UZG4_MOUSE, SYIC_MOUSE, GBB2_MOUSE, E9PWM7_MOUSE, A0A0G2JEU9_MOUSE, Q99LT1_MOUSE, H3BLF7_MOUSE, Q3U9V4_MOUSE, D3Z1T4_MOUSE, D3Z1M1_MOUSE, D3YZX3_MOUSE, Q3U1B1_MOUSE, GBB1_MOUSE, Q3TUZ1_MOUSE, E9Q866_MOUSE, E9QKR0_MOUSE, A0A0G2JDH0_MOUSE, Q9QWG2_MOUSE, A0A0G2JDV0_MOUSE, F6Q6R1_MOUSE				5.10901
GOTERM_MF_DIRECT	GO:0031625~ubiquitin protein ligase binding	14	2.50447	0.0448119	TF65_MOUSE, Q8CCG5_MOUSE, H7BXC3_MOUSE, Q8BNM3_MOUSE, Q9CS50_MOUSE, Q8C5G6_MOUSE, SRPRB_MOUSE, E9PXT5_MOUSE, Q5SS40_MOUSE, Q3TP23_MOUSE, Q3V453_MOUSE, Q3TLY0_MOUSE, Q9CTG1_MOUSE, A0A087WQM2_MOUSE, F6QZZ3_MOUSE, P70305_MOUSE, F8S0Y0_MOUSE, E9Q5V9_MOUSE, Q2M4H5_MOUSE, A0JLQ7_MOUSE, D3Z632_MOUSE, Q3U3Q8_MOUSE, Q542X6_MOUSE, Q3UD60_MOUSE, TOLIP_MOUSE, A2AI69_MOUSE, RALB_MOUSE, Q8C3Z4_MOUSE, Q548Y4_MO…				1.82593
GOTERM_MF_DIRECT	GO:0008017~microtubule binding	11	1.9678	0.044859	D3YYK8_MOUSE, Q8C1L3_MOUSE, DCTN1_MOUSE, Q08EB5_MOUSE, E9PZ43_MOUSE, A0A140LIY2_MOUSE, MARE2_MOUSE, Q3T9V8_MOUSE, Q9D2H3_MOUSE, D3YX34_MOUSE, GA2L1_MOUSE, Q3TRF1_MOUSE, E9Q586_MOUSE, D3Z6W1_MOUSE, F6VMS8_MOUSE, A0A0G2JDU1_MOUSE, A0A0G2JFT4_MOUSE, E9Q1B7_MOUSE, Q60638_MOUSE, A0A0G2JFH2_MOUSE, Q08EB6_MOUSE, Q8BSE7_MOUSE, D3Z2M9_MOUSE, A0A0G2JG35_MOUSE, A0A0G2JFK3_MOUSE, D2KHZ9_MOUSE, MARE3_MOUSE, C…				2.03722
GOTERM_MF_DIRECT	GO:0004527~exonuclease activity	5	0.894454	0.0452891	Q3V476_MOUSE, Q3TAV0_MOUSE, Q8BRV3_MOUSE, Q3TLK9_MOUSE, Q3UNL5_MOUSE, Q8BJ91_MOUSE, Q3UD20_MOUSE, Q543X5_MOUSE, MRE11_MOUSE, B2KF76_MOUSE, ORN_MOUSE, Q3T9B4_MOUSE, B2KF75_MOUSE, XRN2_MOUSE, PNPT1_MOUSE, Q3V231_MOUSE, Q3TST0_MOUSE, CNOT7_MOUSE, Q78KL9_MOUSE, Q3TN29_MOUSE, Q3URU4_MOUSE, F6RX99_MOUSE, Q3TU24_MOUSE, Q3UJN6_MOUSE				3.70403
GOTERM_MF_DIRECT	GO:0032041~NAD-dependent histone deacetylase activity (H3-K14 specific)	3	0.536673	0.0464262	B7ZDF7_MOUSE, A0A087WSF0_MOUSE, SIR3_MOUSE, D3YWD6_MOUSE, Q4FJK3_MOUSE, B7ZDF3_MOUSE, Q3U2E0_MOUSE, B7ZDF4_MOUSE, HDAC5_MOUSE, Q3TSM2_MOUSE, Q3TNU8_MOUSE, Q80TW3_MOUSE, A0A087WQ92_MOUSE, A2AWS5_MOUSE, D3YTK6_MOUSE, Q3UJF1_MOUSE, HDAC4_MOUSE, D6RH93_MOUSE, B7ZDF6_MOUSE, D3YVQ5_MOUSE, Q6P9T4_MOUSE, B7ZDF5_MOUSE				8.54777
GOTERM_MF_DIRECT	GO:0051219~phosphoprotein binding	5	0.894454	0.0510875	G3UXP4_MOUSE, Q3U1Q4_MOUSE, B1AT92_MOUSE, F6SLL0_MOUSE, Q2M4I9_MOUSE, D6REF3_MOUSE, C7IVS7_MOUSE, Q5SS40_MOUSE, Q3TP23_MOUSE, 1433E_MOUSE, Q9Z2S5_MOUSE, Q3V453_MOUSE, A0A087WQM2_MOUSE, A0A0A7NQN9_MOUSE, Q99LY6_MOUSE, P70305_MOUSE, C7TQ55_MOUSE, Q3TUJ5_MOUSE, Q3U5I5_MOUSE, PLCG1_MOUSE, P85A_MOUSE, Q80UI5_MOUSE, F6WA09_MOUSE, Q3TE89_MOUSE, GRB2_MOUSE, G3V016_MOUSE, Q32MF3_MOUSE, A2A4A6_MOUSE, A0A0A…				3.56157
GOTERM_MF_DIRECT	GO:0008081~phosphoric diester hydrolase activity	5	0.894454	0.0510875	Q3TUJ5_MOUSE, G3UXP4_MOUSE, PLCL1_MOUSE, PLCG1_MOUSE, F6SLL0_MOUSE, D6RDF3_MOUSE, Q05DG3_MOUSE, Q3TE89_MOUSE, Q2M4I9_MOUSE, G3V016_MOUSE, A2A4A6_MOUSE, Q9Z2S5_MOUSE, GDPD1_MOUSE, PLCD1_MOUSE, G3X9A7_MOUSE, G5DDB7_MOUSE, PLCX3_MOUSE, B2RPW5_MOUSE, Q3UZ68_MOUSE				3.56157
GOTERM_MF_DIRECT	GO:0015218~pyrimidine nucleotide transmembrane transporter activity	2	0.357782	0.0531563	F6R114_MOUSE, D6RH79_MOUSE, Q8BZJ4_MOUSE, S2536_MOUSE, Q99KM7_MOUSE, S2533_MOUSE				37.0403
GOTERM_MF_DIRECT	GO:0031755~Edg-2 lysophosphatidic acid receptor binding	2	0.357782	0.0531563	Q3U1V3_MOUSE, Q9CXY0_MOUSE, ARBK1_MOUSE, RALA_MOUSE, Q7TS64_MOUSE				37.0403
GOTERM_MF_DIRECT	GO:0047179~platelet-activating factor acetyltransferase activity	2	0.357782	0.0531563	Q8BTA2_MOUSE, Q8CA83_MOUSE, D3Z2X5_MOUSE, D3Z7E6_MOUSE, Q3TJC2_MOUSE, PA1B3_MOUSE, PA1B2_MOUSE				37.0403
GOTERM_MF_DIRECT	GO:0001025~RNA polymerase III transcription factor binding	2	0.357782	0.0531563	B7ZDF7_MOUSE, A0A087WSF0_MOUSE, B7ZDF3_MOUSE, Q3U2E0_MOUSE, B7ZDF4_MOUSE, HDAC5_MOUSE, Q3TSM2_MOUSE, Q3TNU8_MOUSE, Q80TW3_MOUSE, A0A087WQ92_MOUSE, A2AWS5_MOUSE, Q3UJF1_MOUSE, HDAC4_MOUSE, D6RH93_MOUSE, B7ZDF6_MOUSE, Q6P9T4_MOUSE, B7ZDF5_MOUSE				37.0403
GOTERM_MF_DIRECT	GO:0031403~lithium ion binding	2	0.357782	0.0531563	Q3U5R8_MOUSE, A0A0A6YW07_MOUSE, Q3TME6_MOUSE, Q80ZJ2_MOUSE, D3Z7R1_MOUSE, PDXK_MOUSE, Q924B0_MOUSE, Q9D066_MOUSE, IMPA1_MOUSE, D3Z703_MOUSE				37.0403
GOTERM_MF_DIRECT	GO:0031072~heat shock protein binding	5	0.894454	0.0541319	Q3U126_MOUSE, DNJC9_MOUSE, Q8BRQ6_MOUSE, Q3TDI9_MOUSE, E9Q8A6_MOUSE, F6PZ73_MOUSE, D3YTK8_MOUSE, E9PVB6_MOUSE, LIMK1_MOUSE, PLPP_MOUSE, E9Q310_MOUSE, GCR_MOUSE, D3Z280_MOUSE, Q5U5Y4_MOUSE, LMAN2_MOUSE, E9PUR6_MOUSE, Q3TA53_MOUSE, F6XM68_MOUSE, Q3UR47_MOUSE, Q06VW2_MOUSE, Q3UTQ4_MOUSE, Q05DD1_MOUSE, Q3U2M7_MOUSE, Q6IS27_MOUSE, E9PYV1_MOUSE				3.49437
GOTERM_MF_DIRECT	GO:0003924~GTPase activity	11	1.9678	0.0571567	B2RPS1_MOUSE, Q0PD54_MOUSE, GBB4_MOUSE, Q80SX7_MOUSE, Q8CCG5_MOUSE, H3BKR2_MOUSE, V9GWY1_MOUSE, M0QWL7_MOUSE, Q4VA90_MOUSE, A0A0A6YVN9_MOUSE, Q549X4_MOUSE, E9PZK7_MOUSE, Q9D4I9_MOUSE, RB27A_MOUSE, Q3TQ70_MOUSE, Q0PD32_MOUSE, D3YV69_MOUSE, Q61621_MOUSE, Q8C458_MOUSE, Q544U7_MOUSE, GBB2_MOUSE, RAB23_MOUSE, E9PWM7_MOUSE, RALA_MOUSE, F6QC68_MOUSE, H3BLF7_MOUSE, Q3U9V4_MOUSE, Q3U2F9_MOUSE, D3Z1T4_MOUS…				1.94949
GOTERM_MF_DIRECT	GO:0001948~glycoprotein binding	6	1.07335	0.0619331	D3Z4V6_MOUSE, Q3KQQ4_MOUSE, Q3TJ05_MOUSE, Q8K1C3_MOUSE, FGFR1_MOUSE, A0A087WSE0_MOUSE, Q8CIM9_MOUSE, Q3UBT6_MOUSE, A1AT2_MOUSE, A2AKJ5_MOUSE, Q3U724_MOUSE, Q3UB97_MOUSE, Q3UBE4_MOUSE, Q3U902_MOUSE, Q3TMX0_MOUSE, Q60818_MOUSE, A2AKJ9_MOUSE, Q3U6J5_MOUSE, J3QN85_MOUSE, F6VU53_MOUSE, LMAN2_MOUSE, DNJC5_MOUSE, Q3TXC7_MOUSE, Q3USK2_MOUSE, SDCB1_MOUSE, H3BLG5_MOUSE, D3YW77_MOUSE, F7A4U8_MOUSE, G5E8T0_M…				2.81319
GOTERM_MF_DIRECT	GO:0046982~protein heterodimerization activity	21	3.75671	0.0648658	TF65_MOUSE, A0A0N4SWD1_MOUSE, D3YYC2_MOUSE, D3Z2X5_MOUSE, A0A087WQM2_MOUSE, G3UXH5_MOUSE, F6TVW7_MOUSE, Q3U902_MOUSE, A2AKJ9_MOUSE, SUCB2_MOUSE, Q6ZQ77_MOUSE, E3SRG9_MOUSE, Q3UEG9_MOUSE, D3Z7E6_MOUSE, A0A0G2JFU3_MOUSE, Q811W8_MOUSE, H3BLG5_MOUSE, Q3UR47_MOUSE, E9Q3C5_MOUSE, PP2AA_MOUSE, Q8BTA2_MOUSE, A2AKJ6_MOUSE, Q3TZE1_MOUSE, Q548Y4_MOUSE, Q8BPH1_MOUSE, Q3U6Q3_MOUSE, Q8BTL4_MOUSE, P70304_MOUSE,…				1.51332
GOTERM_MF_DIRECT	GO:0005158~insulin receptor binding	4	0.715564	0.0673953	F6Y3V0_MOUSE, PTPRF_MOUSE, G3UXP4_MOUSE, Q3TT24_MOUSE, F6SLL0_MOUSE, Q2M4I9_MOUSE, Q3V0J9_MOUSE, Q63848_MOUSE, Q3TP23_MOUSE, Q9Z2S5_MOUSE, Q64696_MOUSE, A0A087WQM2_MOUSE, Q99LY6_MOUSE, P70305_MOUSE, Q3TUJ5_MOUSE, Q4U1Z0_MOUSE, Q05C78_MOUSE, PTN11_MOUSE, Q9CT18_MOUSE, PLCG1_MOUSE, P85A_MOUSE, Q80UI5_MOUSE, F6S1X8_MOUSE, Q3TE89_MOUSE, G3V016_MOUSE, A2A4A6_MOUSE, Q4JFB8_MOUSE, P70304_MOUSE, Q3UZ68_M…				4.23318
GOTERM_MF_DIRECT	GO:0051721~protein phosphatase 2A binding	4	0.715564	0.072113	F6Y0W2_MOUSE, B7ZD29_MOUSE, Q3UXD8_MOUSE, F6RK07_MOUSE, ANKL2_MOUSE, Q8C3J7_MOUSE, Q9CST0_MOUSE, A2AUX3_MOUSE, PP2AA_MOUSE, Q5SWG2_MOUSE, D6RDE3_MOUSE, Q6IQZ7_MOUSE, Q3U2G7_MOUSE, Q52KF5_MOUSE, DAB2P_MOUSE, A2AUX5_MOUSE, F6QQP6_MOUSE, KS6B1_MOUSE				4.11559
GOTERM_MF_DIRECT	GO:0005524~ATP binding	51	9.12343	0.0721994	KC1E_MOUSE, A0A0N4SVU9_MOUSE, PYC_MOUSE, UBE4B_MOUSE, A0A0N4SWA1_MOUSE, Q8BP54_MOUSE, SYIC_MOUSE, B9EKC0_MOUSE, G5E8T6_MOUSE, Q3TX82_MOUSE, Q8C7V6_MOUSE, A1YYN2_MOUSE, PUR4_MOUSE, Q3U1V3_MOUSE, F6VU53_MOUSE, D3Z5V5_MOUSE, A0A0R4J0S6_MOUSE, G3UY86_MOUSE, A1YYM5_MOUSE, Q3UR47_MOUSE, Q52L53_MOUSE, Q3UPI3_MOUSE, TAOK2_MOUSE, H3BKZ2_MOUSE, Q8BNI3_MOUSE, Q3TZE1_MOUSE, CDK5_MOUSE, NUBPL_MOUSE, D3Z5P5_MO…				1.25352
GOTERM_MF_DIRECT	GO:0004435~phosphatidylinositol phospholipase C activity	3	0.536673	0.0754671	Q3TUJ5_MOUSE, G3UXP4_MOUSE, PLCL1_MOUSE, PLCG1_MOUSE, F6SLL0_MOUSE, Q05DG3_MOUSE, Q3TE89_MOUSE, Q2M4I9_MOUSE, G3V016_MOUSE, A2A4A6_MOUSE, Q9Z2S5_MOUSE, PLCD1_MOUSE, G5DDB7_MOUSE, Q3UZ68_MOUSE				6.53653
GOTERM_MF_DIRECT	GO:0030060~L-malate dehydrogenase activity	2	0.357782	0.0786674	MDHC_MOUSE, B1ATQ3_MOUSE, J3QMC8_MOUSE, MDHM_MOUSE, A0A0G2JGY4_MOUSE, A0A0G2JF23_MOUSE				24.6936
GOTERM_MF_DIRECT	GO:0043125~ErbB-3 class receptor binding	2	0.357782	0.0786674	Q3TP23_MOUSE, Q543F6_MOUSE, CDK5_MOUSE, P85A_MOUSE, Q80UI5_MOUSE, A0A087WQM2_MOUSE, Q99LY6_MOUSE, P70305_MOUSE, P70304_MOUSE, A0A0G2JDL3_MOUSE, Q8C7P2_MOUSE				24.6936
GOTERM_MF_DIRECT	GO:0005483~soluble NSF attachment protein activity	2	0.357782	0.0786674	D6RHL2_MOUSE, Q05DE5_MOUSE, SNAA_MOUSE, Q9CXX1_MOUSE, SNAB_MOUSE				24.6936
GOTERM_MF_DIRECT	GO:0042826~histone deacetylase binding	7	1.25224	0.0822523	TF65_MOUSE, PHB_MOUSE, MECP2_MOUSE, CPSF5_MOUSE, A0A087WSF0_MOUSE, A4L9Q2_MOUSE, D6REF3_MOUSE, B7ZDF3_MOUSE, B7ZDF4_MOUSE, HDAC5_MOUSE, Q5SS40_MOUSE, Q3TNU8_MOUSE, 1433E_MOUSE, A0A087WQ92_MOUSE, Q9CZQ0_MOUSE, Q3V453_MOUSE, Q5SQG5_MOUSE, A2AWS5_MOUSE, Q3UJF1_MOUSE, B7ZDF6_MOUSE, D3Z7U4_MOUSE, Q6P9T4_MOUSE, B7ZDF7_MOUSE, Q3U3Q8_MOUSE, F6WA09_MOUSE, D3YY81_MOUSE, Q3U2E0_MOUSE, Q3TSM2_MOUSE, Q80TW3_M…				2.31502
GOTERM_MF_DIRECT	GO:0001784~phosphotyrosine binding	3	0.536673	0.0834342	Q3U1Q4_MOUSE, Q3U5I5_MOUSE, Q3UF82_MOUSE, B1AT92_MOUSE, Q3U4F3_MOUSE, F6VEI7_MOUSE, PPAL_MOUSE, GRB2_MOUSE, B7ZCF4_MOUSE, MK01_MOUSE, Q3UZN1_MOUSE, B7ZCF5_MOUSE, B1AT95_MOUSE, Q922X7_MOUSE				6.17339
GOTERM_MF_DIRECT	GO:0017091~AU-rich element binding	3	0.536673	0.0834342	Q8BTQ1_MOUSE, Q8BM84_MOUSE, CPSF5_MOUSE, Q8BVF8_MOUSE, Q9CZQ0_MOUSE, Q8BW03_MOUSE, ROA0_MOUSE, ELAV1_MOUSE, Q3UFF9_MOUSE, Q3TT05_MOUSE				6.17339
GOTERM_MF_DIRECT	GO:0031434~mitogen-activated protein kinase kinase binding	3	0.536673	0.0916434	F6Y0W2_MOUSE, KSR2_MOUSE, B7ZD29_MOUSE, F6RK07_MOUSE, C4IXV3_MOUSE, A5X3G4_MOUSE, A2AUX3_MOUSE, TAOK2_MOUSE, D6RDE3_MOUSE, Q3V3V4_MOUSE, Q3U2G7_MOUSE, Q52KF5_MOUSE, DAB2P_MOUSE, A2AUX5_MOUSE, A0A075EIS2_MOUSE, M0QW59_MOUSE, F6QQP6_MOUSE				5.84847
GOTERM_MF_DIRECT	GO:0035091~phosphatidylinositol binding	6	1.07335	0.0923065	F6R7T6_MOUSE, Q3TP89_MOUSE, MYO1E_MOUSE, HIP1R_MOUSE, Q8K0N2_MOUSE, Q9D689_MOUSE, B8JJC6_MOUSE, Q8BPA2_MOUSE, EXOC8_MOUSE, F7DCR9_MOUSE, Q6P1F5_MOUSE, Q3UEX1_MOUSE, Q3TLJ4_MOUSE, Q8K0Y6_MOUSE, Q6ZQ77_MOUSE, A0A0R4J1P1_MOUSE, A0A0G2JFU3_MOUSE, E9Q3C5_MOUSE, SNX24_MOUSE, Q4VA41_MOUSE, TUB_MOUSE, F7BGL3_MOUSE, Q8C123_MOUSE, Q80UP1_MOUSE, Q3TMT9_MOUSE, TULP1_MOUSE				2.4971
GOTERM_MF_DIRECT	GO:0016740~transferase activity	49	8.76565	0.0952163	KC1E_MOUSE, APT_MOUSE, E0CYK9_MOUSE, Q3TX82_MOUSE, A1YYN2_MOUSE, Q641N8_MOUSE, Q3TVV7_MOUSE, Q3U1V3_MOUSE, H3BLQ8_MOUSE, F6VU53_MOUSE, A1YYM5_MOUSE, Q3UR47_MOUSE, Q3UPI3_MOUSE, TAOK2_MOUSE, H3BKZ2_MOUSE, Q3TZE1_MOUSE, CDK5_MOUSE, Q8BFX6_MOUSE, PGTB2_MOUSE, M0QW59_MOUSE, Q3TJG7_MOUSE, Q3TQJ1_MOUSE, H3BKD8_MOUSE, Q8BV72_MOUSE, E9QK53_MOUSE, KSR2_MOUSE, A0A0R4J1Y3_MOUSE, A1YYN1_MOUSE, E9PX88_MOUSE, …				1.233

## Sheet: Additional Table 6
Female GO-BP
Highlighted = Top 10
Category	Term	Count	%	PValue	Genes	Fold Enrichment
GOTERM_BP_DIRECT	GO:0055114~oxidation-reduction process	40	7.15564	3.67593e-06	Q6P8S1_MOUSE, A0ZNJ2_MOUSE, A2AQZ5_MOUSE, ALD1_MOUSE, Q3TX25_MOUSE, GRHPR_MOUSE, AKCL2_MOUSE, A2AL76_MOUSE, Q9CR06_MOUSE, D6RGB1_MOUSE, Q99KV3_MOUSE, DECR_MOUSE, PLOD3_MOUSE, GMPR1_MOUSE, F6V084_MOUSE, AL3B2_MOUSE, Q569U9_MOUSE, A2ABZ2_MOUSE, ARK72_MOUSE, A0A0N4SWC9_MOUSE, B0R075_MOUSE, D6RIQ3_MOUSE, P5CR1_MOUSE, NDUA9_MOUSE, Q9CY59_MOUSE, A2AQZ2_MOUSE, AK1CD_MOUSE, Q5U415_MOUSE, MDHM_MOUSE, A2AL…	2.25251
GOTERM_BP_DIRECT	GO:0015031~protein transport	36	6.44007	6.86469e-06	Q0PD54_MOUSE, M0QWL7_MOUSE, SEC13_MOUSE, Q3TEL0_MOUSE, V9GX76_MOUSE, Q9CZR7_MOUSE, D6RHL2_MOUSE, NUP37_MOUSE, S4R256_MOUSE, Q3U6J9_MOUSE, RAB23_MOUSE, A0A087WQM2_MOUSE, Q8BPF7_MOUSE, LCA5_MOUSE, CHM1A_MOUSE, SNP23_MOUSE, XRP2_MOUSE, Q3UR67_MOUSE, Q3TAR8_MOUSE, D3Z632_MOUSE, Q3TR20_MOUSE, A0A087WQT5_MOUSE, U119B_MOUSE, Q3V2Z9_MOUSE, B1B0P9_MOUSE, P70304_MOUSE, Q3U6W3_MOUSE, A0A087WNX0_MOUSE, BAP31…	2.31491
GOTERM_BP_DIRECT	GO:0061024~membrane organization	10	1.78891	3.64934e-05	Q3TMN8_MOUSE, F6S054_MOUSE, Q3TTA8_MOUSE, MTSSL_MOUSE, Q6NY09_MOUSE, Q544D4_MOUSE, Q2VPC9_MOUSE, Q8BM63_MOUSE, D3YYW4_MOUSE, HIP1R_MOUSE, E9Q8A1_MOUSE, D6RJ29_MOUSE, AAKG2_MOUSE, D3YWC9_MOUSE, Q9D689_MOUSE, RALA_MOUSE, Q8BPA2_MOUSE, SNP23_MOUSE, B0R029_MOUSE, EXOC8_MOUSE, D3YUS1_MOUSE, Q8BZ14_MOUSE, A2ACH6_MOUSE, F7DCR9_MOUSE, Q9D3L3_MOUSE, Q6P1F5_MOUSE, B0R030_MOUSE, A2AKH4_MOUSE, Q6ZQ77_MOUSE, …	6.04244
GOTERM_BP_DIRECT	GO:0006810~transport	76	13.5957	5.27706e-05	Q0PD54_MOUSE, D3YUN8_MOUSE, DCTN1_MOUSE, M0QWL7_MOUSE, Q8C2Q8_MOUSE, NCBP3_MOUSE, Q9CZR7_MOUSE, D6RHL2_MOUSE, S4R256_MOUSE, NUP37_MOUSE, D6RCZ1_MOUSE, RAB23_MOUSE, A0A087WQM2_MOUSE, Q8BPF7_MOUSE, D3YX34_MOUSE, A2A543_MOUSE, E9Q586_MOUSE, F6V084_MOUSE, F6TVW7_MOUSE, CHM1A_MOUSE, XRP2_MOUSE, Q8C7V6_MOUSE, CACB1_MOUSE, Q3UR67_MOUSE, ERGI1_MOUSE, A2AKV3_MOUSE, SRSF7_MOUSE, Q4KL64_MOUSE, NDUA9_MOUSE, …	1.58788
GOTERM_BP_DIRECT	GO:0006629~lipid metabolic process	27	4.83005	0.000206213	Q05DG3_MOUSE, PYC_MOUSE, Q2M4I9_MOUSE, PGES2_MOUSE, Q5F1Z8_MOUSE, Q9Z2S5_MOUSE, Q8BP54_MOUSE, D3Z2X5_MOUSE, G5E8R3_MOUSE, DECR_MOUSE, PLCX3_MOUSE, E9QAC9_MOUSE, D3Z5V5_MOUSE, Q9CT18_MOUSE, D3Z7E6_MOUSE, F7B2N8_MOUSE, D6RGT1_MOUSE, Q9CY59_MOUSE, E9PXB0_MOUSE, G3V016_MOUSE, Q8BTA2_MOUSE, A2A4A6_MOUSE, Q8BT67_MOUSE, Q4FJK0_MOUSE, HMGCL_MOUSE, PECR_MOUSE, AAKG1_MOUSE, B2RPW5_MOUSE, A0A0A0MQM3_MOUSE, …	2.23926
GOTERM_BP_DIRECT	GO:0006006~glucose metabolic process	9	1.61002	0.000391363	ODPB_MOUSE, H7BXC3_MOUSE, AIMP1_MOUSE, G3P_MOUSE, Q8R2U8_MOUSE, Q3TP23_MOUSE, A0A0G2JDW6_MOUSE, Q8C2U7_MOUSE, Q3UZG4_MOUSE, A0A087WQM2_MOUSE, Q99LY6_MOUSE, P70305_MOUSE, Q3TSZ4_MOUSE, A0A0R4J0X7_MOUSE, Q3V2I5_MOUSE, A0A0G2JEU9_MOUSE, Q3TZ44_MOUSE, A2AC16_MOUSE, F6XWR4_MOUSE, P85A_MOUSE, Q80UI5_MOUSE, PDK1_MOUSE, DCXR_MOUSE, Q3TUZ1_MOUSE, A0A0G2JDH0_MOUSE, A0A0G2JDV0_MOUSE, S4R2L8_MOUSE, Q8BFP4_MO…	5.03833
GOTERM_BP_DIRECT	GO:0007399~nervous system development	22	3.9356	0.00101501	F6Y3V0_MOUSE, PTPRF_MOUSE, Q543F6_MOUSE, B7ZCD3_MOUSE, M0QWL7_MOUSE, C0IMX1_MOUSE, Q3TEL0_MOUSE, A0A140LIY2_MOUSE, B7ZDF4_MOUSE, Q05BE7_MOUSE, F6XL33_MOUSE, TSC1_MOUSE, D3Z7I6_MOUSE, Q3U6J9_MOUSE, RAB23_MOUSE, Q3UJF1_MOUSE, Q8R1P3_MOUSE, Q3TAR8_MOUSE, Q4U1Z0_MOUSE, MDGA1_MOUSE, Q8BQP0_MOUSE, F2Z3X2_MOUSE, Q8C423_MOUSE, D3Z549_MOUSE, Q3U2E0_MOUSE, D3Z499_MOUSE, SRRM4_MOUSE, CDK5_MOUSE, Q4JFB8_MOUS…	2.22144
GOTERM_BP_DIRECT	GO:0030036~actin cytoskeleton organization	12	2.14669	0.00130822	O08548_MOUSE, Q6P247_MOUSE, A8Y5C3_MOUSE, E9QAD8_MOUSE, A2AQW2_MOUSE, CSRP1_MOUSE, D3Z7A7_MOUSE, PHAR4_MOUSE, IQEC1_MOUSE, A4GZ26_MOUSE, Q3TIT7_MOUSE, FMNL2_MOUSE, E41L5_MOUSE, D3Z5I6_MOUSE, Q3U902_MOUSE, A2AKJ9_MOUSE, Q3U6J5_MOUSE, A0A0A0MQJ4_MOUSE, Q3TXP6_MOUSE, Q3TJP4_MOUSE, Q3TXC7_MOUSE, D3Z6V7_MOUSE, SDCB1_MOUSE, H3BLG5_MOUSE, F8VPR2_MOUSE, FLII_MOUSE, Q3TJB5_MOUSE, Q3TLY3_MOUSE, Q8BI52_MOUS…	3.21696
GOTERM_BP_DIRECT	GO:0051028~mRNA transport	9	1.61002	0.00216057	Q3TLD7_MOUSE, SRSF7_MOUSE, Q4KL64_MOUSE, Q3THA6_MOUSE, SEC13_MOUSE, ALRF2_MOUSE, Q3TLK3_MOUSE, Q3UK83_MOUSE, NCBP1_MOUSE, F6QXN3_MOUSE, THOC4_MOUSE, NCBP3_MOUSE, ROA1_MOUSE, F7AI47_MOUSE, NUP37_MOUSE, G3X9I4_MOUSE, Q5EBP8_MOUSE, Q3TFB1_MOUSE, Q7TPS9_MOUSE, SRSF1_MOUSE, Q3U7F3_MOUSE, H7BX95_MOUSE, Q3TIK8_MOUSE	3.89325
GOTERM_BP_DIRECT	GO:0006397~mRNA processing	19	3.39893	0.00222647	Q8C839_MOUSE, A0A0G2JH09_MOUSE, Q3THA6_MOUSE, Q3UK83_MOUSE, Q3T9M5_MOUSE, NCBP3_MOUSE, G3UW94_MOUSE, Q9CZQ0_MOUSE, XRN2_MOUSE, PNPT1_MOUSE, A0A0G2JFE4_MOUSE, U2AF1_MOUSE, RBM27_MOUSE, Q3US00_MOUSE, Q3TB51_MOUSE, DCPS_MOUSE, SRSF7_MOUSE, Q4KL64_MOUSE, A0A0N4SVC2_MOUSE, A0A0G2JDW3_MOUSE, NCBP1_MOUSE, A0A087WNS2_MOUSE, ROA1_MOUSE, SRRM4_MOUSE, Q3UIB4_MOUSE, G3X9I4_MOUSE, Q5EBP8_MOUSE, SRSF1_MOUSE, Q…	2.24621
GOTERM_BP_DIRECT	GO:0034067~protein localization to Golgi apparatus	4	0.715564	0.00252438	Q0PD54_MOUSE, Q80SX7_MOUSE, F6VU53_MOUSE, ARFRP_MOUSE, Q3USK2_MOUSE, Q3TR20_MOUSE, Q3UBT6_MOUSE, F7A4U8_MOUSE, E9PZK7_MOUSE, A0A0R4J0Q9_MOUSE, D3YV69_MOUSE, Q3U4W5_MOUSE, V9GX20_MOUSE, RAB6A_MOUSE, KC1D_MOUSE, COG7_MOUSE	13.8427
GOTERM_BP_DIRECT	GO:0030335~positive regulation of cell migration	14	2.50447	0.00278349	F6VSK8_MOUSE, Q8BNH0_MOUSE, Q3UDM1_MOUSE, Q3UF82_MOUSE, J3QMW4_MOUSE, MK01_MOUSE, NUMB_MOUSE, Q9CRE1_MOUSE, Q05BE7_MOUSE, Q3TP23_MOUSE, Q8CG29_MOUSE, D3Z7I6_MOUSE, B1AR48_MOUSE, Q8CC06_MOUSE, RACK1_MOUSE, A0A087WQM2_MOUSE, Q8BRD0_MOUSE, Q3TIT7_MOUSE, G3UZR3_MOUSE, P70305_MOUSE, Q3U902_MOUSE, Q8C7V6_MOUSE, Q3TWK2_MOUSE, Q3TD73_MOUSE, A2AKJ9_MOUSE, Q3U6J5_MOUSE, Q3TXP6_MOUSE, E9Q1I5_MOUSE, Q3TJP4_M…	2.62534
GOTERM_BP_DIRECT	GO:0006470~protein dephosphorylation	11	1.9678	0.00347886	F6Y3V0_MOUSE, PTPRF_MOUSE, TIM50_MOUSE, Q8VED4_MOUSE, A0A0G2JF34_MOUSE, Q3TT24_MOUSE, A0A0G2JFF1_MOUSE, PP2BB_MOUSE, A0A0G2JGC1_MOUSE, E9Q6P2_MOUSE, Q3V0J9_MOUSE, Q6ZWM8_MOUSE, A0A0N4SVL9_MOUSE, PLPP_MOUSE, Q63848_MOUSE, Q8BN07_MOUSE, Q64696_MOUSE, PP2AB_MOUSE, Q3UXV4_MOUSE, MYPT1_MOUSE, Q5U5Y4_MOUSE, Q4U1Z0_MOUSE, Q8BT83_MOUSE, Q05C78_MOUSE, PTN11_MOUSE, Q9CT18_MOUSE, F6S1X8_MOUSE, Q9CVB2_MOUSE,…	3.03436
GOTERM_BP_DIRECT	GO:0031175~neuron projection development	11	1.9678	0.00366331	Q543F6_MOUSE, B7ZCD3_MOUSE, E9PZ43_MOUSE, UBE4B_MOUSE, Q3V426_MOUSE, O88682_MOUSE, Q684Q2_MOUSE, E9QB01_MOUSE, A3KMI8_MOUSE, A0A0A6YY91_MOUSE, Q60818_MOUSE, Q3SYI6_MOUSE, A0A0G2JDU1_MOUSE, A0A0G2JFT4_MOUSE, Q61948_MOUSE, J3QN85_MOUSE, NCAM1_MOUSE, Q60638_MOUSE, Q91WP4_MOUSE, O08909_MOUSE, A0A0G2JFH2_MOUSE, Q3UPI3_MOUSE, CNTP2_MOUSE, CDK5_MOUSE, A0A0G2JG35_MOUSE, A0A0G2JFK3_MOUSE, Q3V2Z9_MOUSE, Q6…	3.01253
GOTERM_BP_DIRECT	GO:0008652~cellular amino acid biosynthetic process	5	0.894454	0.00380925	A2ABZ2_MOUSE, MTNB_MOUSE, ENOPH_MOUSE, Q3TMZ1_MOUSE, P5CR1_MOUSE, A2ABZ3_MOUSE, P5CR3_MOUSE, A2ABZ0_MOUSE, Q3TJ21_MOUSE, Q3UTR5_MOUSE, P5CR2_MOUSE	7.61347
GOTERM_BP_DIRECT	GO:0007264~small GTPase mediated signal transduction	15	2.68336	0.00390117	Q0PD54_MOUSE, Q8CCG5_MOUSE, Q80SX7_MOUSE, F6Y6I9_MOUSE, Q9D372_MOUSE, E9Q0F8_MOUSE, M0QWL7_MOUSE, RAB30_MOUSE, Q549X4_MOUSE, DAB1_MOUSE, Q0PD24_MOUSE, SRPRB_MOUSE, Q9D4I9_MOUSE, RB27A_MOUSE, Q544U7_MOUSE, RABL6_MOUSE, RAB23_MOUSE, D3YZ27_MOUSE, Q3TWY9_MOUSE, Q3TTF7_MOUSE, ARFRP_MOUSE, Q05D38_MOUSE, Q542X6_MOUSE, Q8C423_MOUSE, RALB_MOUSE, E9Q8G6_MOUSE, B2RRQ8_MOUSE, V9GX20_MOUSE, F6VRL0_MOUSE, B2R…	2.41954
GOTERM_BP_DIRECT	GO:0019884~antigen processing and presentation of exogenous antigen	3	0.536673	0.00397272	PSME1_MOUSE, Q99LN3_MOUSE, FCGR1_MOUSE, G3UXY0_MOUSE, Q8R142_MOUSE, Q5SVP3_MOUSE, E0CZ90_MOUSE, A0A0G2JE74_MOUSE, G3UWN9_MOUSE, G3X9K9_MOUSE, G3X9V0_MOUSE, G3UXR1_MOUSE, PSME2_MOUSE, Q5HZK3_MOUSE, G3UXZ5_MOUSE	28.5505
GOTERM_BP_DIRECT	GO:0016192~vesicle-mediated transport	14	2.50447	0.00419324	Q0PD54_MOUSE, F6Z6A5_MOUSE, Q3TP89_MOUSE, SEC13_MOUSE, E9Q8A1_MOUSE, RB27A_MOUSE, SC31A_MOUSE, Q544U7_MOUSE, D6RHL2_MOUSE, S4R256_MOUSE, CHM1A_MOUSE, SNP23_MOUSE, B0R029_MOUSE, Q3UR67_MOUSE, ERGI1_MOUSE, Q8K0Y6_MOUSE, Q9CVL3_MOUSE, STX4_MOUSE, Q3TR27_MOUSE, S4R1Y8_MOUSE, F7BGL3_MOUSE, S4R192_MOUSE, TULP1_MOUSE, BAP31_MOUSE, F6R7T6_MOUSE, Q3U983_MOUSE, SNAA_MOUSE, RABE1_MOUSE, Q9CXX1_MOUSE, D6RJ29…	2.50208
GOTERM_BP_DIRECT	GO:0098609~cell-cell adhesion	13	2.32558	0.00426426	Q6P247_MOUSE, F7CUV7_MOUSE, A2AQW2_MOUSE, F7CD65_MOUSE, V9GX76_MOUSE, I7HJS1_MOUSE, CAZA1_MOUSE, FMNL2_MOUSE, Q3TMI0_MOUSE, Q811S2_MOUSE, Q3UQ26_MOUSE, Q3TPY5_MOUSE, Q8BI52_MOUSE, Q3UJV2_MOUSE, A0A0G2JE27_MOUSE, Q3TN39_MOUSE, A0A0U1RPL0_MOUSE, HCFC1_MOUSE, VIGLN_MOUSE, Q3U144_MOUSE, A8Y5D5_MOUSE, Q3UZ62_MOUSE, Q69ZS5_MOUSE, A0A087WQY9_MOUSE, A0PJE9_MOUSE, B1AUX2_MOUSE, Q3USQ6_MOUSE, Q5RKN9_MOUSE,…	2.61839
GOTERM_BP_DIRECT	GO:0050905~neuromuscular process	5	0.894454	0.00440995	MECP2_MOUSE, D6RFT3_MOUSE, E9QM77_MOUSE, ATX2_MOUSE, SMBP2_MOUSE, Q3UX07_MOUSE, D3YY81_MOUSE, PEX5_MOUSE, F6U2Q5_MOUSE, Q3TCH2_MOUSE, D3Z600_MOUSE, F6UTV7_MOUSE, F6U2C2_MOUSE, UCHL1_MOUSE, D3Z5P5_MOUSE, F6U209_MOUSE, I7ENE7_MOUSE, F7B6X4_MOUSE, D3Z7U4_MOUSE, A0A0B4J1E3_MOUSE, Q3UX51_MOUSE, A0A0G2JF15_MOUSE, F6V8M6_MOUSE	7.32065
GOTERM_BP_DIRECT	GO:0007162~negative regulation of cell adhesion	6	1.07335	0.00463659	B2RWT9_MOUSE, D3YUD0_MOUSE, DAB1_MOUSE, A0A140LHX7_MOUSE, B1AQX9_MOUSE, Q9CRE1_MOUSE, Q684R0_MOUSE, Q3TP23_MOUSE, Q8CG29_MOUSE, F2Z465_MOUSE, B1AQX6_MOUSE, A0A0G2JDM9_MOUSE, A0A087WQM2_MOUSE, Q99LY6_MOUSE, G3UZR3_MOUSE, P70305_MOUSE, MYO1F_MOUSE, A0A0A0MQI4_MOUSE, PLXB3_MOUSE, P85A_MOUSE, Q80UI5_MOUSE, B1AQX8_MOUSE, Q8C423_MOUSE, SRCN1_MOUSE, Q91ZI3_MOUSE, G3V011_MOUSE, Q811E7_MOUSE, PLXB1_MOUSE,…	5.4382
GOTERM_BP_DIRECT	GO:0048167~regulation of synaptic plasticity	6	1.07335	0.00463659	MECP2_MOUSE, Q543F6_MOUSE, Q61947_MOUSE, Q3TP56_MOUSE, A0A0G2JDL3_MOUSE, Q3UXX4_MOUSE, E9Q175_MOUSE, E9Q3L1_MOUSE, V9GX76_MOUSE, MYO6_MOUSE, O88682_MOUSE, Q3U8L7_MOUSE, Q3USD8_MOUSE, B2RWR8_MOUSE, V9GXM4_MOUSE, D3Z7U4_MOUSE, E9QB01_MOUSE, A0A0A6YY91_MOUSE, Q61948_MOUSE, CTND2_MOUSE, E9QKH8_MOUSE, 1433G_MOUSE, B7ZNF6_MOUSE, NCAM1_MOUSE, E9Q589_MOUSE, Q3TPK9_MOUSE, Q3US07_MOUSE, D3YY81_MOUSE, O0890…	5.4382
GOTERM_BP_DIRECT	GO:0007030~Golgi organization	8	1.43113	0.00464784	A0A140LHW9_MOUSE, RAB30_MOUSE, Q08EB5_MOUSE, Q3UF57_MOUSE, Q3UBT6_MOUSE, A2RRR3_MOUSE, A0A0R4J0M9_MOUSE, KPCD1_MOUSE, Q0PD24_MOUSE, B9EJA4_MOUSE, A0A0R4J0Q9_MOUSE, E9Q8N5_MOUSE, D3YV16_MOUSE, B7ZCJ1_MOUSE, VCIP1_MOUSE, G3UWM5_MOUSE, B7ZCJ0_MOUSE, Q3UMT4_MOUSE, B2RWX1_MOUSE, F6VU53_MOUSE, Q8R337_MOUSE, LMAN2_MOUSE, Q3USK2_MOUSE, Q3TR20_MOUSE, F7A4U8_MOUSE, G3UX38_MOUSE, Q08EB6_MOUSE, Q8BSE7_MOUSE,…	3.85492
GOTERM_BP_DIRECT	GO:0051301~cell division	20	3.57782	0.00475523	F8WHU7_MOUSE, D3YYK8_MOUSE, Q543F6_MOUSE, Q08EB5_MOUSE, A0A140LIY2_MOUSE, MARE2_MOUSE, NUP37_MOUSE, CHM1A_MOUSE, A0A0G2JDU1_MOUSE, A0A0A6YVV4_MOUSE, A0A0R4J2D7_MOUSE, A0A0A6YVR4_MOUSE, A0A0G2JFH2_MOUSE, RALB_MOUSE, Q8BSE7_MOUSE, E9Q0P6_MOUSE, F6TNY1_MOUSE, CDK5_MOUSE, Q3U1C2_MOUSE, A0A0G2JG35_MOUSE, Q8BFX6_MOUSE, A0A0G2JFK3_MOUSE, D6REF2_MOUSE, Q8C411_MOUSE, CLAP2_MOUSE, F7DCH5_MOUSE, D3YW60_MOUS…	2.03569
GOTERM_BP_DIRECT	GO:0006107~oxaloacetate metabolic process	4	0.715564	0.00525252	Q3T9S7_MOUSE, MDHC_MOUSE, B1ATQ3_MOUSE, NIT2_MOUSE, J3QMC8_MOUSE, A0A0G2JF23_MOUSE, PYC_MOUSE, Q62043_MOUSE, Q3UFS6_MOUSE, Q8BP54_MOUSE, MDHM_MOUSE, G5E8R3_MOUSE, A0A0G2JGY4_MOUSE, Q3TCQ3_MOUSE, E9QPD7_MOUSE	10.8764
GOTERM_BP_DIRECT	GO:0070935~3'-UTR-mediated mRNA stabilization	4	0.715564	0.00525252	Q3U6W5_MOUSE, Q3UDG9_MOUSE, MYD88_MOUSE, Q0PM15_MOUSE, Q8BVF8_MOUSE, Q3TIB3_MOUSE, Q8BY56_MOUSE, Q8BW03_MOUSE, ROA0_MOUSE, Q3U7M4_MOUSE, RBM10_MOUSE, Q8C1X0_MOUSE, Q566J0_MOUSE, Q0PM16_MOUSE, Q8BTQ1_MOUSE, Q8BM84_MOUSE, F6SPW1_MOUSE, ELAV1_MOUSE, Q3UFF9_MOUSE, Q3TT05_MOUSE	10.8764
GOTERM_BP_DIRECT	GO:0006468~protein phosphorylation	27	4.83005	0.00529975	KC1E_MOUSE, Q543M9_MOUSE, A0A0J9YUX1_MOUSE, Q543F6_MOUSE, P70273_MOUSE, A0A140LIY2_MOUSE, G3UWU5_MOUSE, A0A0J9YU20_MOUSE, Q8BP44_MOUSE, A0A087WQM2_MOUSE, Q3TX82_MOUSE, A1YYN2_MOUSE, Q60818_MOUSE, G3UZX4_MOUSE, Q3U1V3_MOUSE, F6VU53_MOUSE, A1YYM7_MOUSE, A1YYM5_MOUSE, E9PX60_MOUSE, Q3UR47_MOUSE, Q3UPI3_MOUSE, A2AI69_MOUSE, TAOK2_MOUSE, Q8C3Z4_MOUSE, Q3TZE1_MOUSE, CDK5_MOUSE, E9Q7T0_MOUSE, Q8BFX6_MOU…	1.78441
GOTERM_BP_DIRECT	GO:0007005~mitochondrion organization	8	1.43113	0.00533288	S4R1B3_MOUSE, PHB_MOUSE, Q3TMN8_MOUSE, D6RH79_MOUSE, Q3TXN0_MOUSE, Q2VPC9_MOUSE, S4R1A8_MOUSE, Q8BM63_MOUSE, D3YYW4_MOUSE, AAKG2_MOUSE, Q3UJR3_MOUSE, Q3UMP2_MOUSE, Q5SQG5_MOUSE, Q8BZJ4_MOUSE, F6XUR8_MOUSE, D3YUS1_MOUSE, S2533_MOUSE, F6TCV0_MOUSE, HTRA2_MOUSE, D3Z5V5_MOUSE, D3YX27_MOUSE, S2536_MOUSE, Q80V84_MOUSE, Q8BIQ9_MOUSE, PEX5_MOUSE, Q3TWR3_MOUSE, D3Z600_MOUSE, F6R114_MOUSE, Q3TV00_MOUSE, HM…	3.75974
GOTERM_BP_DIRECT	GO:0008152~metabolic process	23	4.11449	0.00544118	A0A087WRE0_MOUSE, H7BXC3_MOUSE, ENOPH_MOUSE, Q3TX25_MOUSE, UCK1_MOUSE, PYC_MOUSE, GRHPR_MOUSE, MAAI_MOUSE, AUHM_MOUSE, A0A0N4SWD1_MOUSE, D3Z6F9_MOUSE, Q8BP54_MOUSE, G5E8R3_MOUSE, D3Z5W9_MOUSE, UMPS_MOUSE, Q9CRH8_MOUSE, ISOC1_MOUSE, AL3B2_MOUSE, E9QAC9_MOUSE, Q3TCQ3_MOUSE, GSTM4_MOUSE, MET13_MOUSE, PLPL8_MOUSE, Q3TVV7_MOUSE, Q3T9S7_MOUSE, B0R075_MOUSE, SUCB2_MOUSE, D6REG4_MOUSE, H3BLQ8_MOUSE, F7B2…	1.89104
GOTERM_BP_DIRECT	GO:0051881~regulation of mitochondrial membrane potential	5	0.894454	0.00579599	A2ABZ2_MOUSE, H3BJF2_MOUSE, PCLI1_MOUSE, D6RH79_MOUSE, P5CR1_MOUSE, H3BKK5_MOUSE, H3BJT8_MOUSE, A2ABZ3_MOUSE, Q542F1_MOUSE, S2536_MOUSE, A2ABZ0_MOUSE, Q3UTR5_MOUSE, F6R114_MOUSE, Q3TPJ6_MOUSE, H3BJG6_MOUSE, Q8BZJ4_MOUSE, Q99KM7_MOUSE, S2533_MOUSE, Q3TIP8_MOUSE, CLIC1_MOUSE	6.79774
GOTERM_BP_DIRECT	GO:0048812~neuron projection morphogenesis	7	1.25224	0.00604905	Q542P2_MOUSE, F6Y0W2_MOUSE, B2RWT9_MOUSE, Q543F6_MOUSE, B7ZD29_MOUSE, D3YUD0_MOUSE, A0A0G2JDL3_MOUSE, A2AUX3_MOUSE, F6U2Q5_MOUSE, E9PXJ0_MOUSE, A7YY80_MOUSE, Q8BT38_MOUSE, D6RDE3_MOUSE, A0A0G2JDM9_MOUSE, Q8R1P3_MOUSE, A2AUX5_MOUSE, Q3UX51_MOUSE, F6QQP6_MOUSE, F6V8M6_MOUSE, E9QM77_MOUSE, ATX2_MOUSE, F6RK07_MOUSE, V6BQR3_MOUSE, D0VYV6_MOUSE, A7MCX4_MOUSE, Q3UX07_MOUSE, B6ZHD1_MOUSE, E41L3_MOUSE, D0…	4.22971
GOTERM_BP_DIRECT	GO:0016310~phosphorylation	28	5.00894	0.00609373	KC1E_MOUSE, A0A0J9YUX1_MOUSE, Q543F6_MOUSE, UCK1_MOUSE, P70273_MOUSE, A0A140LIY2_MOUSE, A0A0J9YU20_MOUSE, Q8BP44_MOUSE, IP6K1_MOUSE, Q3TX82_MOUSE, A1YYN2_MOUSE, Q60818_MOUSE, Q3U1V3_MOUSE, F6VU53_MOUSE, A1YYM7_MOUSE, A1YYM5_MOUSE, E9PX60_MOUSE, Q3UR47_MOUSE, Q3UPI3_MOUSE, TOLIP_MOUSE, TAOK2_MOUSE, H3BKZ2_MOUSE, Q3TZE1_MOUSE, CDK5_MOUSE, E9Q7T0_MOUSE, Q8BFX6_MOUSE, Q3V3V4_MOUSE, E9Q7E8_MOUSE, Q8C4…	1.74164
GOTERM_BP_DIRECT	GO:0007049~cell cycle	28	5.00894	0.00630707	F8WHU7_MOUSE, D3YYK8_MOUSE, Q543F6_MOUSE, B7ZD29_MOUSE, Q08EB5_MOUSE, A0A140LIY2_MOUSE, A0A0N4SVL9_MOUSE, MARE2_MOUSE, NUP37_MOUSE, RACK1_MOUSE, CHM1A_MOUSE, A2AUX5_MOUSE, A0A0A6YVV4_MOUSE, A0A0R4J2D7_MOUSE, A0A0A6YVR4_MOUSE, PPP6_MOUSE, Q811S2_MOUSE, Q3UQ26_MOUSE, RALB_MOUSE, Q8BSE7_MOUSE, E9Q0P6_MOUSE, F6TNY1_MOUSE, Q3TZE1_MOUSE, CDK5_MOUSE, Q3U1C2_MOUSE, Q8BFX6_MOUSE, D6REF2_MOUSE, Q8C411_MOUS…	1.73597
GOTERM_BP_DIRECT	GO:0044257~cellular protein catabolic process	4	0.715564	0.00643922	S4R1B3_MOUSE, F6Y0W2_MOUSE, B7ZD29_MOUSE, Q3TXN0_MOUSE, S4R1A8_MOUSE, UBE4B_MOUSE, Q3V426_MOUSE, Q8VBX5_MOUSE, Q3UB92_MOUSE, G3UZD6_MOUSE, A2AUX3_MOUSE, Q3TEL0_MOUSE, G3UZM6_MOUSE, Q3UJR3_MOUSE, Q3UFT5_MOUSE, F7CTA8_MOUSE, D6RDE3_MOUSE, Q3U6J9_MOUSE, B1B0P8_MOUSE, A2AUX5_MOUSE, F6XUR8_MOUSE, F6TCV0_MOUSE, F6QQP6_MOUSE, Q3TAR8_MOUSE, HTRA2_MOUSE, Q6NWW1_MOUSE, D3YX27_MOUSE, F6RK07_MOUSE, H7BXC2_MO…	10.1513
GOTERM_BP_DIRECT	GO:0048742~regulation of skeletal muscle fiber development	3	0.536673	0.00650647	B7ZDF7_MOUSE, A0A087WSF0_MOUSE, NACAM_MOUSE, B7ZDF3_MOUSE, Q3UK68_MOUSE, Q3U2E0_MOUSE, B7ZDF4_MOUSE, HDAC5_MOUSE, Q3TSM2_MOUSE, Q3TNU8_MOUSE, NACA_MOUSE, Q80TW3_MOUSE, A0A087WQ92_MOUSE, A2AWS5_MOUSE, Q3UJF1_MOUSE, HDAC4_MOUSE, D6RH93_MOUSE, B7ZDF6_MOUSE, Q6P9T4_MOUSE, B7ZDF5_MOUSE	22.8404
GOTERM_BP_DIRECT	GO:0055129~L-proline biosynthetic process	3	0.536673	0.00650647	A2ABZ2_MOUSE, Q3TMZ1_MOUSE, P5CR1_MOUSE, A2ABZ3_MOUSE, P5CR3_MOUSE, A2ABZ0_MOUSE, Q3TJ21_MOUSE, Q3UTR5_MOUSE, P5CR2_MOUSE	22.8404
GOTERM_BP_DIRECT	GO:0007265~Ras protein signal transduction	6	1.07335	0.00751598	Q8CCG5_MOUSE, Q3U1Q4_MOUSE, Q3UZ62_MOUSE, B1AT92_MOUSE, KPCD1_MOUSE, Q58E42_MOUSE, A2AKJ5_MOUSE, Q3U724_MOUSE, Q3UB97_MOUSE, RALA_MOUSE, Q3UBE4_MOUSE, F6QC68_MOUSE, Q3U902_MOUSE, Q3TMX0_MOUSE, A2AI52_MOUSE, A2AKJ9_MOUSE, Q3U6J5_MOUSE, Q3U5I5_MOUSE, Q3TXC7_MOUSE, Q9CXY0_MOUSE, SDCB1_MOUSE, H3BLG5_MOUSE, GRB2_MOUSE, O88601_MOUSE, Q3UQ26_MOUSE, Q3TWV1_MOUSE, RALB_MOUSE, Q3UC68_MOUSE, A2AKJ6_MOUSE, Q…	4.85966
GOTERM_BP_DIRECT	GO:0016042~lipid catabolic process	9	1.61002	0.00795376	G3UXP4_MOUSE, Q3TJC2_MOUSE, F6SLL0_MOUSE, D6RDF3_MOUSE, Q05DG3_MOUSE, Q2M4I9_MOUSE, Q8VBX5_MOUSE, Q3UB92_MOUSE, Q3TEL0_MOUSE, A0A0N4SUZ2_MOUSE, Q9CVC9_MOUSE, Q9Z2S5_MOUSE, Q3UFT5_MOUSE, F7CTA8_MOUSE, Q8CA83_MOUSE, D3Z2X5_MOUSE, D3Z5W9_MOUSE, Q3U6J9_MOUSE, G5DDB7_MOUSE, PLCX3_MOUSE, E9QAC9_MOUSE, B1B0P8_MOUSE, PLPL8_MOUSE, Q3TAR8_MOUSE, Q3TUJ5_MOUSE, Q3UFX6_MOUSE, MGLL_MOUSE, PLCG1_MOUSE, D3Z7E6_M…	3.14318
GOTERM_BP_DIRECT	GO:0006897~endocytosis	12	2.14669	0.00835071	KC1E_MOUSE, HIP1R_MOUSE, F7CUV7_MOUSE, F7CD65_MOUSE, V9GX76_MOUSE, Q9QUI3_MOUSE, EPN2_MOUSE, B2RWR8_MOUSE, F6VMS8_MOUSE, Q6P1F5_MOUSE, A8Y5D4_MOUSE, Q3TLJ4_MOUSE, Q6ZQ77_MOUSE, F6VU53_MOUSE, A0A0G2JFU3_MOUSE, F6VQ30_MOUSE, Q5NCM6_MOUSE, B1AQD9_MOUSE, F7A4U8_MOUSE, E9Q3C5_MOUSE, Q3TR27_MOUSE, Q8BK95_MOUSE, Q3V2Z9_MOUSE, Q80UP1_MOUSE, Q3UGH4_MOUSE, A8Y5D5_MOUSE, Q3U983_MOUSE, A8Y2Z9_MOUSE, D6RCG0_M…	2.5238
GOTERM_BP_DIRECT	GO:0006915~apoptotic process	26	4.65116	0.00853515	S4R1B3_MOUSE, MYD88_MOUSE, Q0PM15_MOUSE, A0A0J9YUX1_MOUSE, Q543F6_MOUSE, B7ZD29_MOUSE, Q3TXN0_MOUSE, Q3U7M4_MOUSE, P70273_MOUSE, Q7TS70_MOUSE, A0A0J9YU20_MOUSE, Q8BP44_MOUSE, RACK1_MOUSE, A2AUX5_MOUSE, A1YYN2_MOUSE, F6XUR8_MOUSE, D3Z632_MOUSE, Q6ZQ77_MOUSE, A1YYM7_MOUSE, Q3TIB3_MOUSE, A0A0G2JFU3_MOUSE, V6BQR3_MOUSE, A1YYM5_MOUSE, E9PX60_MOUSE, E9Q3C5_MOUSE, Q3TUZ1_MOUSE, RALB_MOUSE, ASPP1_MOUSE, …	1.73641
GOTERM_BP_DIRECT	GO:0044597~daunorubicin metabolic process	3	0.536673	0.00959096	ARK72_MOUSE, Q3UDY1_MOUSE, ALD2_MOUSE, Q5U415_MOUSE, Q3TCL2_MOUSE, ALDR_MOUSE, D3YVJ7_MOUSE, Q3ULP0_MOUSE	19.0337
GOTERM_BP_DIRECT	GO:0006561~proline biosynthetic process	3	0.536673	0.00959096	A2ABZ2_MOUSE, Q3TMZ1_MOUSE, P5CR1_MOUSE, A2ABZ3_MOUSE, P5CR3_MOUSE, A2ABZ0_MOUSE, Q3TJ21_MOUSE, Q3UTR5_MOUSE, P5CR2_MOUSE	19.0337
GOTERM_BP_DIRECT	GO:0044598~doxorubicin metabolic process	3	0.536673	0.00959096	ARK72_MOUSE, Q3UDY1_MOUSE, ALD2_MOUSE, Q5U415_MOUSE, Q3TCL2_MOUSE, ALDR_MOUSE, D3YVJ7_MOUSE, Q3ULP0_MOUSE	19.0337
GOTERM_BP_DIRECT	GO:0040029~regulation of gene expression, epigenetic	4	0.715564	0.0108955	MECP2_MOUSE, Q05CK6_MOUSE, A0A087WSF0_MOUSE, B7ZDF3_MOUSE, B7ZDF4_MOUSE, HDAC5_MOUSE, Q3TNU8_MOUSE, CTCF_MOUSE, A0A087WQ92_MOUSE, A2AWS5_MOUSE, Q3UJF1_MOUSE, B7ZDF6_MOUSE, D3Z7U4_MOUSE, Q6P9T4_MOUSE, Q3USR8_MOUSE, B7ZDF7_MOUSE, D3YY81_MOUSE, Q3U2E0_MOUSE, Q3TSM2_MOUSE, Q80TW3_MOUSE, HDAC4_MOUSE, D6RH93_MOUSE, Q3UZH8_MOUSE, B7ZDF5_MOUSE, Q3UYZ8_MOUSE	8.45942
GOTERM_BP_DIRECT	GO:0008380~RNA splicing	14	2.50447	0.0113944	Q8C839_MOUSE, A0A0G2JH09_MOUSE, Q3THA6_MOUSE, Q3UK83_MOUSE, RBM10_MOUSE, Q3T9M5_MOUSE, G3UW94_MOUSE, A0A0G2JFE4_MOUSE, U2AF1_MOUSE, Q3US00_MOUSE, Q3TB51_MOUSE, DCPS_MOUSE, Q8BY56_MOUSE, SRSF7_MOUSE, Q4KL64_MOUSE, A0A0N4SVC2_MOUSE, A0A0G2JDW3_MOUSE, NCBP1_MOUSE, A0A087WNS2_MOUSE, ROA1_MOUSE, SRRM4_MOUSE, Q3UIB4_MOUSE, G3X9I4_MOUSE, Q5EBP8_MOUSE, SRSF1_MOUSE, Q3U7F3_MOUSE, Q3TIK8_MOUSE, Q8C2Y9_MOUS…	2.21138
GOTERM_BP_DIRECT	GO:0016477~cell migration	12	2.14669	0.0121967	F6Y3V0_MOUSE, PTPRF_MOUSE, O08548_MOUSE, G3UXP4_MOUSE, Q543F6_MOUSE, F6SLL0_MOUSE, Q08EB5_MOUSE, Q2M4I9_MOUSE, D3Z7A7_MOUSE, Q3V0J9_MOUSE, Q9Z2S5_MOUSE, BACD2_MOUSE, Q3TIT7_MOUSE, Q8CD51_MOUSE, KS6B1_MOUSE, F7D9F7_MOUSE, Q3TUJ5_MOUSE, Q4U1Z0_MOUSE, Q3TXP6_MOUSE, Q3TJP4_MOUSE, PLCG1_MOUSE, F6S1X8_MOUSE, Q8C3J7_MOUSE, F7B9G4_MOUSE, Q3TJB5_MOUSE, Q3TLY3_MOUSE, G3V016_MOUSE, D3YYT0_MOUSE, Q08EB6_MOUS…	2.39167
GOTERM_BP_DIRECT	GO:0002091~negative regulation of receptor internalization	3	0.536673	0.0131957	E0CX41_MOUSE, F6U2Q5_MOUSE, A2AKJ5_MOUSE, Q3U724_MOUSE, Q3UB97_MOUSE, Q3UBE4_MOUSE, Q3U902_MOUSE, Q3UX51_MOUSE, Q3TMX0_MOUSE, F6V8M6_MOUSE, A2AKJ9_MOUSE, Q3U6J5_MOUSE, E9QM77_MOUSE, ATX2_MOUSE, LRRT1_MOUSE, Q3TXC7_MOUSE, SDCB1_MOUSE, Q3UX07_MOUSE, H3BLG5_MOUSE, O88601_MOUSE, Q3TWV1_MOUSE, Q3UC68_MOUSE, A2AKJ6_MOUSE, Q3TET7_MOUSE, F6UTV7_MOUSE, F6U2C2_MOUSE, F6U209_MOUSE, Q3U6Q3_MOUSE, F7B6X4_MOUS…	16.3146
GOTERM_BP_DIRECT	GO:0009156~ribonucleoside monophosphate biosynthetic process	3	0.536673	0.0131957	PUR4_MOUSE, E9Q242_MOUSE, E9PZI0_MOUSE, Q8BVW7_MOUSE, G3UY86_MOUSE, Q14BH5_MOUSE, Q3TMB8_MOUSE, PRPS2_MOUSE, F6RUL9_MOUSE, A0A140LHU1_MOUSE, A0A0G2JFL8_MOUSE, PUR8_MOUSE, A0A0G2JFI8_MOUSE, E9Q3T7_MOUSE, E9Q0A0_MOUSE, Q3UTT7_MOUSE	16.3146
GOTERM_BP_DIRECT	GO:0010807~regulation of synaptic vesicle priming	3	0.536673	0.0131957	RB3GP_MOUSE, D6RHL2_MOUSE, Q05DE5_MOUSE, SNAA_MOUSE, Q9CXX1_MOUSE, Q3UYK8_MOUSE, SNAB_MOUSE	16.3146
GOTERM_BP_DIRECT	GO:0006417~regulation of translation	9	1.61002	0.0143976	E9Q6M7_MOUSE, Q3UHW0_MOUSE, Q3V476_MOUSE, Q8BVF8_MOUSE, Q3UXD8_MOUSE, Q3TTW5_MOUSE, Q5GFF3_MOUSE, SARNP_MOUSE, IMPCT_MOUSE, Q3TLK3_MOUSE, Q3TQ21_MOUSE, Q9CST0_MOUSE, Q543X5_MOUSE, Q3UR00_MOUSE, Q8BM84_MOUSE, Q3TRI4_MOUSE, TSC1_MOUSE, A8WHM8_MOUSE, RACK1_MOUSE, ELAV1_MOUSE, CNOT7_MOUSE, KS6B1_MOUSE, Q8BQP0_MOUSE, F2Z3W0_MOUSE, Q8BW03_MOUSE, Q3TLK9_MOUSE, Q8C3J7_MOUSE, F2Z3X2_MOUSE, NCBP1_MOUSE, B7…	2.83146
GOTERM_BP_DIRECT	GO:0006541~glutamine metabolic process	4	0.715564	0.0146447	MECP2_MOUSE, NIT2_MOUSE, PUR4_MOUSE, Q8BVW7_MOUSE, G3UY86_MOUSE, Q14BH5_MOUSE, D3YY81_MOUSE, F6RUL9_MOUSE, Q3TSQ7_MOUSE, DHE3_MOUSE, F7CFA5_MOUSE, D3Z7U4_MOUSE, Q3UTT7_MOUSE	7.61347
GOTERM_BP_DIRECT	GO:0034976~response to endoplasmic reticulum stress	7	1.25224	0.0146727	Q8VED4_MOUSE, F6TRP3_MOUSE, UBE4B_MOUSE, Q3V426_MOUSE, G3UZD6_MOUSE, G3UZM6_MOUSE, Q3TP23_MOUSE, Q8BN07_MOUSE, PP2AB_MOUSE, A0A087WQM2_MOUSE, F6V084_MOUSE, Q99LY6_MOUSE, EI2BE_MOUSE, F6T9C3_MOUSE, P70305_MOUSE, Q6NWW1_MOUSE, P85A_MOUSE, Q80UI5_MOUSE, H7BXC2_MOUSE, HYOU1_MOUSE, E0CYZ2_MOUSE, P70304_MOUSE, TMX1_MOUSE, UFL1_MOUSE, Q8C7P2_MOUSE, Q8VCI2_MOUSE	3.5062
GOTERM_BP_DIRECT	GO:0046627~negative regulation of insulin receptor signaling pathway	5	0.894454	0.0155481	PCLI1_MOUSE, TF65_MOUSE, F6Y3V0_MOUSE, PTPRF_MOUSE, Q3TT24_MOUSE, Q3UXD8_MOUSE, A4L9Q2_MOUSE, Q9CST0_MOUSE, Q3V0J9_MOUSE, TSC1_MOUSE, Q64696_MOUSE, Q3TPJ6_MOUSE, KS6B1_MOUSE, H3BJF2_MOUSE, Q4U1Z0_MOUSE, H3BKK5_MOUSE, H3BJT8_MOUSE, Q8BQP0_MOUSE, F2Z3W0_MOUSE, F6S1X8_MOUSE, Q3U3Q8_MOUSE, Q8C3J7_MOUSE, F2Z3X2_MOUSE, Q5SWG2_MOUSE, Q548Y4_MOUSE, H3BJG6_MOUSE, Q4JFB8_MOUSE, Q6IQZ7_MOUSE, Q8BTL4_MOUSE, …	5.14424
GOTERM_BP_DIRECT	GO:0006605~protein targeting	5	0.894454	0.0170267	1433G_MOUSE, F6WA09_MOUSE, Q3TP56_MOUSE, D6REF3_MOUSE, E9PVU0_MOUSE, RB27A_MOUSE, A8IP69_MOUSE, E9Q174_MOUSE, H3BIV5_MOUSE, Q5SS40_MOUSE, 1433E_MOUSE, E9Q175_MOUSE, E9Q3L1_MOUSE, V9GX76_MOUSE, MYO6_MOUSE, Q544U7_MOUSE, Q8BK95_MOUSE, Q8BPH1_MOUSE, Q3V453_MOUSE, Q6A077_MOUSE, B2RWR8_MOUSE, V9GXM4_MOUSE, AKAP5_MOUSE	5.00886
GOTERM_BP_DIRECT	GO:0006020~inositol metabolic process	3	0.536673	0.0172914	Q3U5R8_MOUSE, MECP2_MOUSE, A0A0A6YW07_MOUSE, Q3TME6_MOUSE, Q80ZJ2_MOUSE, Q3UGJ0_MOUSE, H3BKD8_MOUSE, H3BLD6_MOUSE, Q924B0_MOUSE, D3YY81_MOUSE, A0A0A6YVR5_MOUSE, IMPA1_MOUSE, D3Z703_MOUSE, H3BKZ2_MOUSE, F7CWH3_MOUSE, IP6K1_MOUSE, D3Z7U4_MOUSE, H3BIW9_MOUSE, Q9D066_MOUSE, Q6A097_MOUSE	14.2753
GOTERM_BP_DIRECT	GO:0034551~mitochondrial respiratory chain complex III assembly	3	0.536673	0.0172914	A6PWX5_MOUSE, D6RJ23_MOUSE, E0CXL8_MOUSE, UQCC1_MOUSE, Q9D857_MOUSE, A6PWX7_MOUSE, F7BCD5_MOUSE, D6RJ83_MOUSE, A6PWX8_MOUSE, D6RHP7_MOUSE, A6PWX9_MOUSE, D6RDC3_MOUSE, F6V305_MOUSE, TTC19_MOUSE, S2533_MOUSE	14.2753
GOTERM_BP_DIRECT	GO:0007040~lysosome organization	5	0.894454	0.0185902	Q05BP5_MOUSE, Q3TAR8_MOUSE, D3Z632_MOUSE, CLVS1_MOUSE, AKTIP_MOUSE, Q3U4F3_MOUSE, PPT1_MOUSE, Q8VBX5_MOUSE, Q3UB92_MOUSE, PPAL_MOUSE, B7ZCF4_MOUSE, Q3TEL0_MOUSE, CLVS2_MOUSE, Q3UZN1_MOUSE, Q3UFT5_MOUSE, F7CTA8_MOUSE, B7ZCF5_MOUSE, Q3U6J9_MOUSE, B1B0P9_MOUSE, B1B0P8_MOUSE, Q3U6W3_MOUSE, D3Z2J4_MOUSE	4.88043
GOTERM_BP_DIRECT	GO:0060828~regulation of canonical Wnt signaling pathway	4	0.715564	0.0190354	Q8BN81_MOUSE, D3YV23_MOUSE, AMER2_MOUSE, Q3UXX4_MOUSE, E9Q9M2_MOUSE, A2AM95_MOUSE, E9PVC7_MOUSE, Q3U8L7_MOUSE, I7HJS1_MOUSE, Q3USD8_MOUSE, Q8BQ67_MOUSE, CTND2_MOUSE, E9QKH8_MOUSE, B7ZNF6_MOUSE, B7FAU5_MOUSE, Q3TPK9_MOUSE, Q3US07_MOUSE, EMD_MOUSE, Q3THM8_MOUSE, CDK14_MOUSE, A0A0R4J030_MOUSE, Q8BFX6_MOUSE, Q6NVF8_MOUSE, Q8C411_MOUSE, D6RFS0_MOUSE, Q9D4N7_MOUSE	6.92134
GOTERM_BP_DIRECT	GO:0043171~peptide catabolic process	4	0.715564	0.0190354	A0A087WRE0_MOUSE, AMPE_MOUSE, Q3TTA8_MOUSE, Q3TA05_MOUSE, A0A0R4J050_MOUSE, ACY1_MOUSE, Q6NY09_MOUSE, A0A087WPX1_MOUSE, F7B9G4_MOUSE, AMPN_MOUSE, Q3UP74_MOUSE, A0A0U1RPR2_MOUSE, A0A0U1RNS3_MOUSE, F6YHW2_MOUSE, LCAP_MOUSE, Q52JJ6_MOUSE, Q8CD51_MOUSE, Q3TB69_MOUSE, Q6P3C1_MOUSE, Q8BZ14_MOUSE, A0A087WPV3_MOUSE	6.92134
GOTERM_BP_DIRECT	GO:0050821~protein stabilization	9	1.61002	0.0195704	HCFC1_MOUSE, PHB_MOUSE, Q8CDE0_MOUSE, RB3GP_MOUSE, Q9DC36_MOUSE, Q5SS83_MOUSE, HIP1R_MOUSE, B1AUX2_MOUSE, G3P_MOUSE, A0A0R4J0Q9_MOUSE, Q3USQ6_MOUSE, E9PV09_MOUSE, Q3TP23_MOUSE, TSC1_MOUSE, Q5SQG5_MOUSE, Q9D689_MOUSE, A0A087WQM2_MOUSE, Q99LY6_MOUSE, P70305_MOUSE, Q8BPA2_MOUSE, F7DCR9_MOUSE, FLOT2_MOUSE, Q6P1F5_MOUSE, Q6ZQ77_MOUSE, Q3UEG9_MOUSE, Q8BQP0_MOUSE, F2Z3W0_MOUSE, A0A0G2JFU3_MOUSE, P85A_MO…	2.67661
GOTERM_BP_DIRECT	GO:0006898~receptor-mediated endocytosis	6	1.07335	0.0203246	F6TRP3_MOUSE, A0A0G2JE74_MOUSE, Q8VBX5_MOUSE, Q3UB92_MOUSE, HIP1R_MOUSE, Q3TEL0_MOUSE, Q3UFT5_MOUSE, FRIL1_MOUSE, F7CTA8_MOUSE, Q3U6J9_MOUSE, Q9D689_MOUSE, B1B0P8_MOUSE, Q8BPA2_MOUSE, F7DCR9_MOUSE, Q3TAR8_MOUSE, Q6P1F5_MOUSE, FCGR1_MOUSE, Q6ZQ77_MOUSE, Q3V475_MOUSE, Q8R142_MOUSE, A0A0G2JFU3_MOUSE, MILK1_MOUSE, PPT1_MOUSE, HYOU1_MOUSE, E9Q3C5_MOUSE, Q3V2Z9_MOUSE, E0CYZ2_MOUSE, Q3ULW5_MOUSE, B1B0P9…	3.80674
GOTERM_BP_DIRECT	GO:0006887~exocytosis	8	1.43113	0.0205427	CAPS1_MOUSE, Q543F6_MOUSE, K4DI76_MOUSE, A0A0G2JDL3_MOUSE, A0A140LHX7_MOUSE, B1AQX9_MOUSE, E9Q8A1_MOUSE, RB27A_MOUSE, Q544U7_MOUSE, J3QJW3_MOUSE, B1AQX6_MOUSE, RALA_MOUSE, SNP23_MOUSE, B0R029_MOUSE, EXOC8_MOUSE, Q9D3L3_MOUSE, B0R030_MOUSE, A2AKH4_MOUSE, CDK16_MOUSE, B1AQX8_MOUSE, Q9CXY0_MOUSE, Q91WP4_MOUSE, SRCN1_MOUSE, Q3UPI3_MOUSE, Q3TM24_MOUSE, CDK5_MOUSE, B1AQX7_MOUSE, Q543G3_MOUSE	2.90037
GOTERM_BP_DIRECT	GO:0045292~mRNA cis splicing, via spliceosome	3	0.536673	0.02185	Q3TBW9_MOUSE, DCPS_MOUSE, RBM22_MOUSE, D6RFQ0_MOUSE, Q3TLK3_MOUSE, NCBP1_MOUSE	12.6891
GOTERM_BP_DIRECT	GO:0006631~fatty acid metabolic process	10	1.78891	0.0219567	Q3TMN8_MOUSE, D6RHN4_MOUSE, Q2VPC9_MOUSE, Q8BM63_MOUSE, D3YYW4_MOUSE, PGES2_MOUSE, A0A0N4SUZ2_MOUSE, D3Z6F9_MOUSE, Q9CVC9_MOUSE, AAKG2_MOUSE, A0A0A6YWP8_MOUSE, ECH1_MOUSE, DECR_MOUSE, D3Z5W9_MOUSE, E9QAC9_MOUSE, PLPL8_MOUSE, D3YUS1_MOUSE, F7B227_MOUSE, Q3UXD9_MOUSE, Q148P2_MOUSE, CRYL1_MOUSE, Q3UFX6_MOUSE, MGLL_MOUSE, D3Z5V5_MOUSE, E9Q3B9_MOUSE, F7B2N8_MOUSE, Q8BIQ9_MOUSE, E9PXB0_MOUSE, Q9D221_MO…	2.44022
GOTERM_BP_DIRECT	GO:0017157~regulation of exocytosis	4	0.715564	0.0268384	B0R030_MOUSE, A2AKH4_MOUSE, Q9CXY0_MOUSE, Q05D38_MOUSE, Q4VA90_MOUSE, Q549X4_MOUSE, STX4_MOUSE, E9Q8A1_MOUSE, D6RJ29_MOUSE, RALA_MOUSE, RB27B_MOUSE, SNP23_MOUSE, B0R029_MOUSE, Q9D3L3_MOUSE	6.09078
GOTERM_BP_DIRECT	GO:0007416~synapse assembly	5	0.894454	0.0298162	Q542P2_MOUSE, MECP2_MOUSE, Q543F6_MOUSE, D3YY81_MOUSE, A0A0G2JDL3_MOUSE, CADH2_MOUSE, D3YYT0_MOUSE, E9PVU0_MOUSE, E9Q174_MOUSE, E9Q175_MOUSE, E9Q3L1_MOUSE, V9GX76_MOUSE, MYO6_MOUSE, Q8BK95_MOUSE, CDK5_MOUSE, Q6A077_MOUSE, Q8R1P3_MOUSE, B2RWR8_MOUSE, V9GXM4_MOUSE, D3Z7U4_MOUSE, Q3UIC2_MOUSE, GPM6A_MOUSE, Q8BSI9_MOUSE	4.22971
GOTERM_BP_DIRECT	GO:0007067~mitotic nuclear division	14	2.50447	0.0314971	F8WHU7_MOUSE, Q8BSB5_MOUSE, D3YYK8_MOUSE, Q8C1L3_MOUSE, Q08EB5_MOUSE, A0A140LIY2_MOUSE, MARE2_MOUSE, NUP37_MOUSE, STAG2_MOUSE, VCIP1_MOUSE, A0A0A6YVV4_MOUSE, F6XQW1_MOUSE, A0A0R4J2D7_MOUSE, Q3UQG8_MOUSE, A0A0A6YVR4_MOUSE, A0A0A6YXJ3_MOUSE, E9Q1B7_MOUSE, Q8C918_MOUSE, Q3TS88_MOUSE, Q08EB6_MOUSE, Q8BSE7_MOUSE, E9Q0P6_MOUSE, F6TNY1_MOUSE, Q3U1C2_MOUSE, Q80T83_MOUSE, D6REF2_MOUSE, MARE3_MOUSE, CLAP2_…	1.92398
GOTERM_BP_DIRECT	GO:0043254~regulation of protein complex assembly	3	0.536673	0.0322489	HCFC1_MOUSE, F6Y0W2_MOUSE, Q05C78_MOUSE, PTN11_MOUSE, Q9CT18_MOUSE, B7ZD29_MOUSE, F6RK07_MOUSE, F6SJS2_MOUSE, B1AUX2_MOUSE, A2AUX3_MOUSE, Q3USQ6_MOUSE, Q811S2_MOUSE, Q63848_MOUSE, D6RDE3_MOUSE, Q3U2G7_MOUSE, Q52KF5_MOUSE, DAB2P_MOUSE, A2AUX5_MOUSE, F6QQP6_MOUSE	10.382
GOTERM_BP_DIRECT	GO:0032092~positive regulation of protein binding	6	1.07335	0.0327971	Q8CCG5_MOUSE, Q543F6_MOUSE, HIP1R_MOUSE, Q3TAB8_MOUSE, A0A0G2JDL3_MOUSE, Q9D689_MOUSE, E41L5_MOUSE, F6QC68_MOUSE, Q8BPA2_MOUSE, F7DCR9_MOUSE, Q05BP5_MOUSE, Q6P1F5_MOUSE, D3Z632_MOUSE, Q6ZQ77_MOUSE, A0A0G2JFU3_MOUSE, AKTIP_MOUSE, E9Q3C5_MOUSE, PACS1_MOUSE, A0A087WP93_MOUSE, RALB_MOUSE, CDK5_MOUSE, Q3TP27_MOUSE, Q8BT29_MOUSE, Q80UP1_MOUSE, D3Z2J4_MOUSE	3.35889
GOTERM_BP_DIRECT	GO:0071902~positive regulation of protein serine/threonine kinase activity	4	0.715564	0.0328504	Q8CCG5_MOUSE, F6Y0W2_MOUSE, A2ACM0_MOUSE, B7ZD29_MOUSE, F6U5L3_MOUSE, A2AUX3_MOUSE, A4FUW1_MOUSE, F7B6I3_MOUSE, D6RDE3_MOUSE, Q8BSE8_MOUSE, F6QC68_MOUSE, A2AUX5_MOUSE, A7MAY7_MOUSE, RPTOR_MOUSE, F6QQP6_MOUSE, F7CN67_MOUSE, E9PXZ5_MOUSE, F6RK07_MOUSE, PP2AA_MOUSE, RALB_MOUSE, F7BQS0_MOUSE, Q6ZPU3_MOUSE, Q3U2G7_MOUSE, Q52KF5_MOUSE, DAB2P_MOUSE	5.63961
GOTERM_BP_DIRECT	GO:0008344~adult locomotory behavior	6	1.07335	0.0346278	E9Q6M7_MOUSE, S4R1B3_MOUSE, MECP2_MOUSE, Q3UHW0_MOUSE, Q3TXN0_MOUSE, Q3TTW5_MOUSE, S4R1A8_MOUSE, A0A0U1RPR3_MOUSE, Q3TQ21_MOUSE, Q8VBX5_MOUSE, Q3UB92_MOUSE, Q3TEL0_MOUSE, Q3UR00_MOUSE, Q3UJR3_MOUSE, Q3TRI4_MOUSE, Q3UFT5_MOUSE, TSC1_MOUSE, A8WHM8_MOUSE, F7CTA8_MOUSE, D3YY14_MOUSE, Q3U6J9_MOUSE, D3Z7U4_MOUSE, B1B0P8_MOUSE, F6XUR8_MOUSE, F6TCV0_MOUSE, SE6L2_MOUSE, Q3TAR8_MOUSE, HTRA2_MOUSE, Q8BQP0_M…	3.31021
GOTERM_BP_DIRECT	GO:0030100~regulation of endocytosis	4	0.715564	0.0360969	B2RPS1_MOUSE, A8Y5D5_MOUSE, Q69ZS5_MOUSE, HIP1R_MOUSE, F7CUV7_MOUSE, Q5NCM7_MOUSE, F7CD65_MOUSE, Q8C458_MOUSE, EPN2_MOUSE, Q9D689_MOUSE, B7ZCJ1_MOUSE, Q8BPA2_MOUSE, F7DCR9_MOUSE, G3UWM5_MOUSE, B7ZCJ0_MOUSE, Q6P1F5_MOUSE, A8Y5D4_MOUSE, B2RWX1_MOUSE, Q6ZQ77_MOUSE, RAB5B_MOUSE, A0A0G2JFU3_MOUSE, Q5NCM6_MOUSE, E9Q3C5_MOUSE, G3UX38_MOUSE, F6WQR2_MOUSE, A2BHQ2_MOUSE, J3QNT7_MOUSE, RHG21_MOUSE, Q80UP1_M…	5.4382
GOTERM_BP_DIRECT	GO:0045921~positive regulation of exocytosis	4	0.715564	0.0360969	CAPS1_MOUSE, Q8R337_MOUSE, K4DI76_MOUSE, Q05D38_MOUSE, Q4VA90_MOUSE, Q08EB5_MOUSE, Q3UF57_MOUSE, Q549X4_MOUSE, A2RRR3_MOUSE, B9EJA4_MOUSE, E9Q8N5_MOUSE, Q08EB6_MOUSE, RB27A_MOUSE, Q8BSE7_MOUSE, Q544U7_MOUSE, J3QJW3_MOUSE, RB27B_MOUSE, CLAP2_MOUSE, F7DCH5_MOUSE	5.4382
GOTERM_BP_DIRECT	GO:0060048~cardiac muscle contraction	5	0.894454	0.0366499	Q3TJG7_MOUSE, Q3UDI2_MOUSE, MP2K6_MOUSE, Q60521_MOUSE, A2AGS2_MOUSE, Q3U1V3_MOUSE, Q5SWN9_MOUSE, Q1MXF8_MOUSE, Q543Z5_MOUSE, Q7TS64_MOUSE, P70273_MOUSE, F6QXN3_MOUSE, MP2K3_MOUSE, F7AI47_MOUSE, Q3TLX7_MOUSE, Q8BP44_MOUSE, ARBK1_MOUSE, SCN2B_MOUSE, Q3TX82_MOUSE, SRSF1_MOUSE, H7BX95_MOUSE, A0A0R4J1Q6_MOUSE, Q3UU57_MOUSE	3.96535
GOTERM_BP_DIRECT	GO:0050766~positive regulation of phagocytosis	5	0.894454	0.0366499	Q3UEX1_MOUSE, F6R7T6_MOUSE, Q3TP89_MOUSE, Q8K0Y6_MOUSE, FCGR1_MOUSE, LMAN2_MOUSE, Q8R142_MOUSE, A0A0R4J1P1_MOUSE, A0A0G2JE74_MOUSE, RB27A_MOUSE, Q8K0N2_MOUSE, Q4VA41_MOUSE, Q544U7_MOUSE, TUB_MOUSE, F7BGL3_MOUSE, B8JJC6_MOUSE, Q3TMT9_MOUSE, TULP1_MOUSE	3.96535
GOTERM_BP_DIRECT	GO:0033962~cytoplasmic mRNA processing body assembly	3	0.536673	0.0380385	Q3V476_MOUSE, E9QM77_MOUSE, ATX2_MOUSE, Q3TLK9_MOUSE, Q3TS82_MOUSE, Q3UX07_MOUSE, Q543X5_MOUSE, F6U2Q5_MOUSE, H7BX02_MOUSE, RC3H1_MOUSE, F6UTV7_MOUSE, F6U2C2_MOUSE, F6U209_MOUSE, Q3V231_MOUSE, F7B6X4_MOUSE, CNOT7_MOUSE, Q3UX51_MOUSE, A0A0G2JF15_MOUSE, Q3UT88_MOUSE, F6V8M6_MOUSE	9.51684
GOTERM_BP_DIRECT	GO:0007252~I-kappaB phosphorylation	3	0.536673	0.0380385	F6Y0W2_MOUSE, ELP1_MOUSE, Q923A8_MOUSE, B7ZD29_MOUSE, F6RK07_MOUSE, A2AP93_MOUSE, Q543B5_MOUSE, A2AUX3_MOUSE, Q3TXG1_MOUSE, D6RDE3_MOUSE, A2AP92_MOUSE, Q3U2G7_MOUSE, Q52KF5_MOUSE, DAB2P_MOUSE, A2AUX5_MOUSE, Q3TD73_MOUSE, F6QQP6_MOUSE, M3K7_MOUSE	9.51684
GOTERM_BP_DIRECT	GO:0006476~protein deacetylation	3	0.536673	0.0380385	B7ZDF7_MOUSE, SIR5_MOUSE, SIR3_MOUSE, D3YWD6_MOUSE, Q4FJK3_MOUSE, B7ZDF3_MOUSE, Q3U2E0_MOUSE, B7ZDF4_MOUSE, HDAC5_MOUSE, Q3TSM2_MOUSE, Q5M8R0_MOUSE, Q80TW3_MOUSE, A2AWS5_MOUSE, D3YTK6_MOUSE, Q3UJF1_MOUSE, D6RH93_MOUSE, B7ZDF6_MOUSE, D3YVQ5_MOUSE, Q6P9T4_MOUSE, B7ZDF5_MOUSE	9.51684
GOTERM_BP_DIRECT	GO:0021670~lateral ventricle development	3	0.536673	0.0380385	Q05BE7_MOUSE, D3Z7J1_MOUSE, D3Z7I6_MOUSE, D3Z1E8_MOUSE, DPCD_MOUSE, NUMBL_MOUSE, F8WJ71_MOUSE, D3Z549_MOUSE, Q3UH86_MOUSE, NUMB_MOUSE	9.51684
GOTERM_BP_DIRECT	GO:0043087~regulation of GTPase activity	6	1.07335	0.0384756	Q3TAR2_MOUSE, F6Y0W2_MOUSE, RB3GP_MOUSE, B7ZD29_MOUSE, F6WTE9_MOUSE, A2AUX3_MOUSE, Q684R0_MOUSE, A2ALX6_MOUSE, TSC1_MOUSE, Q3TGN4_MOUSE, D6RDE3_MOUSE, RASL2_MOUSE, A2AUX5_MOUSE, F6W8M5_MOUSE, F6QQP6_MOUSE, Q8C8B2_MOUSE, Q8BQP0_MOUSE, F2Z3W0_MOUSE, PLXB3_MOUSE, Q3TPC4_MOUSE, F6RK07_MOUSE, F2Z3X2_MOUSE, G3UZI7_MOUSE, RHG06_MOUSE, A2ALX7_MOUSE, Q3U2G7_MOUSE, Q52KF5_MOUSE, DAB2P_MOUSE, Q3UYK8_MOUSE, …	3.21696
GOTERM_BP_DIRECT	GO:0043547~positive regulation of GTPase activity	9	1.61002	0.0386815	F6VSK8_MOUSE, B1AQY2_MOUSE, Q3TAR2_MOUSE, Q8BNH0_MOUSE, F8VQ11_MOUSE, B2RWT9_MOUSE, RB3GP_MOUSE, D3YUD0_MOUSE, Q4ZJB3_MOUSE, LIMS1_MOUSE, D6RDB5_MOUSE, A8CVP4_MOUSE, A2ALX6_MOUSE, IQEC1_MOUSE, Q3TGN4_MOUSE, Q8CC06_MOUSE, A0A0G2JDM9_MOUSE, E9QP62_MOUSE, RACK1_MOUSE, B7ZCJ1_MOUSE, Q3TWK2_MOUSE, G3UWM5_MOUSE, B7ZCJ0_MOUSE, B2RWX1_MOUSE, Q8C8B2_MOUSE, RHG23_MOUSE, Q80ZI8_MOUSE, Q3TPC4_MOUSE, ITA6_MOU…	2.34662
GOTERM_BP_DIRECT	GO:0060291~long-term synaptic potentiation	5	0.894454	0.0391118	MECP2_MOUSE, LRRT1_MOUSE, Q3UF82_MOUSE, SYT12_MOUSE, F6VEI7_MOUSE, D3YY81_MOUSE, Q14AG7_MOUSE, E0CX41_MOUSE, STX4_MOUSE, MK01_MOUSE, D6RJ29_MOUSE, E9Q6I4_MOUSE, D3Z7U4_MOUSE, Q922X7_MOUSE	3.88443
GOTERM_BP_DIRECT	GO:0006099~tricarboxylic acid cycle	4	0.715564	0.0395019	MDHC_MOUSE, SUCB2_MOUSE, ODPB_MOUSE, B1ATQ3_MOUSE, J3QMC8_MOUSE, MDHM_MOUSE, A0A0G2JGY4_MOUSE, A0A0G2JF23_MOUSE, C6EQH3_MOUSE, A0A0N4SWD1_MOUSE	5.25067
GOTERM_BP_DIRECT	GO:2000378~negative regulation of reactive oxygen species metabolic process	4	0.715564	0.0395019	F2Z471_MOUSE, SIR5_MOUSE, Q923A8_MOUSE, Q3THL7_MOUSE, SIR3_MOUSE, D3YWD6_MOUSE, A2AP93_MOUSE, Q543B5_MOUSE, Q4FJK3_MOUSE, Q3TXG1_MOUSE, VDAC1_MOUSE, Q5M8R0_MOUSE, D3YTK6_MOUSE, A2AP92_MOUSE, D3YVQ5_MOUSE, Q3U6K8_MOUSE, M3K7_MOUSE, Q3TIG8_MOUSE	5.25067
GOTERM_BP_DIRECT	GO:0021766~hippocampus development	6	1.07335	0.0425744	A0A0G2JDV9_MOUSE, Q3U737_MOUSE, A0A0G2JFB3_MOUSE, Q543F6_MOUSE, Q8C1X9_MOUSE, Q3TFK4_MOUSE, D6REF3_MOUSE, A0A0G2JDL3_MOUSE, Q5SS40_MOUSE, 1433E_MOUSE, TSC1_MOUSE, A0A0G2JGL7_MOUSE, Q3V453_MOUSE, Q3TET3_MOUSE, XRN2_MOUSE, EI2BE_MOUSE, F6T9C3_MOUSE, ANXA3_MOUSE, Q8BQP0_MOUSE, F2Z3W0_MOUSE, F6WA09_MOUSE, F2Z3X2_MOUSE, Q3TLP4_MOUSE, Q8BPH1_MOUSE, CDK5_MOUSE	3.12882
GOTERM_BP_DIRECT	GO:0050775~positive regulation of dendrite morphogenesis	4	0.715564	0.0430638	F6Y3V0_MOUSE, PTPRF_MOUSE, Q4U1Z0_MOUSE, Q3TT24_MOUSE, F6S1X8_MOUSE, D3Z1E8_MOUSE, F8WJ71_MOUSE, D3Z549_MOUSE, Q3UH86_MOUSE, Q3V0J9_MOUSE, NUMB_MOUSE, H3BIV5_MOUSE, Q05BE7_MOUSE, Q64696_MOUSE, D3Z7J1_MOUSE, D3Z7I6_MOUSE, Q4JFB8_MOUSE, NUMBL_MOUSE, AKAP5_MOUSE	5.07565
GOTERM_BP_DIRECT	GO:0033555~multicellular organismal response to stress	3	0.536673	0.0441895	MECP2_MOUSE, Q61947_MOUSE, B7ZDF3_MOUSE, B7ZDF4_MOUSE, HDAC5_MOUSE, O88682_MOUSE, A2AWS5_MOUSE, Q3UJF1_MOUSE, B7ZDF6_MOUSE, D3Z7U4_MOUSE, E9QB01_MOUSE, Q6P9T4_MOUSE, A0A0A6YY91_MOUSE, Q61948_MOUSE, B7ZDF7_MOUSE, NCAM1_MOUSE, E9Q589_MOUSE, D3YY81_MOUSE, O08909_MOUSE, Q3U2E0_MOUSE, A0A0A6YY47_MOUSE, Q3TSM2_MOUSE, Q80TW3_MOUSE, A0A0A6YWW5_MOUSE, D6RH93_MOUSE, B7ZDF5_MOUSE, A0A0A6YWU2_MOUSE, Q61946_M…	8.78478
GOTERM_BP_DIRECT	GO:2001275~positive regulation of glucose import in response to insulin stimulus	3	0.536673	0.0441895	B1AUF8_MOUSE, Q05C78_MOUSE, PTN11_MOUSE, Q9CT18_MOUSE, P85A_MOUSE, Q80UI5_MOUSE, P55G_MOUSE, Q63848_MOUSE, Q3TP23_MOUSE, A0A087WQM2_MOUSE, Q99LY6_MOUSE, P70305_MOUSE, P70304_MOUSE, B1AUG0_MOUSE, Q8C7P2_MOUSE, Q3UXE9_MOUSE	8.78478
GOTERM_BP_DIRECT	GO:0006633~fatty acid biosynthetic process	6	1.07335	0.0447187	Q3TMN8_MOUSE, D6RHN4_MOUSE, Q2VPC9_MOUSE, Q8BM63_MOUSE, D3YYW4_MOUSE, PGES2_MOUSE, A0A0N4SUZ2_MOUSE, D3Z6F9_MOUSE, AAKG2_MOUSE, A0A0A6YWP8_MOUSE, D3YUS1_MOUSE, Q3UXD9_MOUSE, Q148P2_MOUSE, Q3UFX6_MOUSE, MGLL_MOUSE, D3Z5V5_MOUSE, E9Q3B9_MOUSE, Q8BIQ9_MOUSE, D6RIP0_MOUSE, Q3TWR3_MOUSE, Q3UFN1_MOUSE, OXSM_MOUSE, PECR_MOUSE, D3YYS6_MOUSE, AAKG1_MOUSE, Q3U4D5_MOUSE	3.08654
GOTERM_BP_DIRECT	GO:0005975~carbohydrate metabolic process	11	1.9678	0.045512	NPL_MOUSE, MDHC_MOUSE, ODPB_MOUSE, Q3U144_MOUSE, GNPI2_MOUSE, A0A0U1RP98_MOUSE, Q5M8R7_MOUSE, 4F2_MOUSE, A0A0U1RPQ7_MOUSE, AIMP1_MOUSE, D3YWR1_MOUSE, Q8R2U8_MOUSE, LDHB_MOUSE, Q3TIP1_MOUSE, A0A0U1RPK4_MOUSE, D6RCJ1_MOUSE, A0A0G2JDW6_MOUSE, Q8C2U7_MOUSE, Q3UZG4_MOUSE, A0A0G2JGY4_MOUSE, Q3TSZ4_MOUSE, A0A0G2JEU9_MOUSE, A0A0N4SWC9_MOUSE, B1ATQ3_MOUSE, Q3TZ44_MOUSE, A2AC16_MOUSE, F6XWR4_MOUSE, A0A0U1R…	2.03272
GOTERM_BP_DIRECT	GO:0035690~cellular response to drug	6	1.07335	0.0469264	MYPT1_MOUSE, Q544K9_MOUSE, PP2BB_MOUSE, E9Q6P2_MOUSE, Q3TS88_MOUSE, E0CZ78_MOUSE, G3X8U7_MOUSE, RBM22_MOUSE, UMPS_MOUSE, EI2BE_MOUSE, F6T9C3_MOUSE, GSTM4_MOUSE, Q3UXV4_MOUSE, D6RJ62_MOUSE, Q3TVV7_MOUSE	3.04539
GOTERM_BP_DIRECT	GO:0006511~ubiquitin-dependent protein catabolic process	9	1.61002	0.0502035	PSA6_MOUSE, E9Q0X0_MOUSE, Q3TS44_MOUSE, UBE4B_MOUSE, Q3V426_MOUSE, Q8C5G6_MOUSE, Q3UCF0_MOUSE, E9PXT5_MOUSE, Q8BTU5_MOUSE, Q3TLY0_MOUSE, Q9CTG1_MOUSE, Q2M4H5_MOUSE, E0CXB1_MOUSE, Q3UD60_MOUSE, Q3UQ26_MOUSE, TOLIP_MOUSE, G3X914_MOUSE, E0CYT2_MOUSE, Q3TQM7_MOUSE, UBP8_MOUSE, Q3UZ62_MOUSE, PSA1_MOUSE, Q9JHS5_MOUSE, E9PV12_MOUSE, G3UZD6_MOUSE, Q05CY9_MOUSE, PSA4_MOUSE, G3UZM6_MOUSE, Q58E42_MOUSE, CUL…	2.22472
GOTERM_BP_DIRECT	GO:0007032~endosome organization	4	0.715564	0.0506499	B2RPS1_MOUSE, Q05BP5_MOUSE, D3Z632_MOUSE, RAB5B_MOUSE, Q3UZ62_MOUSE, AKTIP_MOUSE, Q3UQ26_MOUSE, Q58E42_MOUSE, Q8C458_MOUSE, Q3TQM7_MOUSE, UBP8_MOUSE, EXOC8_MOUSE, Q0PD56_MOUSE, D3Z2J4_MOUSE, A2AI52_MOUSE	4.75842
GOTERM_BP_DIRECT	GO:0033120~positive regulation of RNA splicing	3	0.536673	0.050679	P85A_MOUSE, Q80UI5_MOUSE, F6QXN3_MOUSE, Q3TP23_MOUSE, F7AI47_MOUSE, RBM22_MOUSE, A0A087WQM2_MOUSE, Q99LY6_MOUSE, P70305_MOUSE, SRSF1_MOUSE, P70304_MOUSE, H7BX95_MOUSE, Q8C7P2_MOUSE	8.15729
GOTERM_BP_DIRECT	GO:0048268~clathrin coat assembly	3	0.536673	0.050679	Q6P1F5_MOUSE, Q6ZQ77_MOUSE, A0A0G2JFU3_MOUSE, F6VQ30_MOUSE, D3Z6N2_MOUSE, D6RCG0_MOUSE, CALY_MOUSE, HIP1R_MOUSE, D3YYE9_MOUSE, E9Q3C5_MOUSE, Q9D689_MOUSE, Q80UP1_MOUSE, Q8BPA2_MOUSE, FCHO1_MOUSE, F7DCR9_MOUSE	8.15729
GOTERM_BP_DIRECT	GO:0061014~positive regulation of mRNA catabolic process	3	0.536673	0.050679	Q3V476_MOUSE, Q3TLK9_MOUSE, Q3TS82_MOUSE, Q3UNL5_MOUSE, Q543X5_MOUSE, H7BX02_MOUSE, RC3H1_MOUSE, PNPT1_MOUSE, Q3V231_MOUSE, Q3TST0_MOUSE, CNOT7_MOUSE, Q3TN29_MOUSE, Q3UT88_MOUSE	8.15729
GOTERM_BP_DIRECT	GO:0035607~fibroblast growth factor receptor signaling pathway involved in orbitofrontal cortex development	2	0.357782	0.0517421	A1YYN6_MOUSE, E9Q700_MOUSE, A1YYM6_MOUSE, E9PXV8_MOUSE, E9Q7E6_MOUSE, E9PX67_MOUSE, A1YYN2_MOUSE, Q60818_MOUSE, A1YYN0_MOUSE, J3QN85_MOUSE, A1YYM7_MOUSE, F2Z480_MOUSE, D6RJK5_MOUSE, A1YYM5_MOUSE, E9PX60_MOUSE, A1YYP0_MOUSE, A1YYN9_MOUSE, E9Q7T0_MOUSE, E9Q5C2_MOUSE, A1YYN3_MOUSE, E9Q7E8_MOUSE, Q61565_MOUSE, D3Z4V6_MOUSE, E9QK53_MOUSE, Q3TJ05_MOUSE, B9EKY4_MOUSE, A1YYN1_MOUSE, E9PX88_MOUSE, FGFR1_M…	38.0674
GOTERM_BP_DIRECT	GO:0021849~neuroblast division in subventricular zone	2	0.357782	0.0517421	Q05BE7_MOUSE, D3Z7J1_MOUSE, D3Z7I6_MOUSE, D3Z1E8_MOUSE, NUMBL_MOUSE, F8WJ71_MOUSE, D3Z549_MOUSE, Q3UH86_MOUSE, NUMB_MOUSE	38.0674
GOTERM_BP_DIRECT	GO:2000124~regulation of endocannabinoid signaling pathway	2	0.357782	0.0517421	ABHD6_MOUSE, Q3UFX6_MOUSE, MGLL_MOUSE, Q9D375_MOUSE, Q3UFN1_MOUSE, E9Q3B9_MOUSE, D3YYS6_MOUSE, A0A0N4SUZ2_MOUSE	38.0674
GOTERM_BP_DIRECT	GO:0001928~regulation of exocyst assembly	2	0.357782	0.0517421	Q61948_MOUSE, Q8CCG5_MOUSE, Q61947_MOUSE, NCAM1_MOUSE, E9Q589_MOUSE, O08909_MOUSE, A0A0A6YY47_MOUSE, RALB_MOUSE, A0A0A6YWW5_MOUSE, O88682_MOUSE, E9QB01_MOUSE, F6QC68_MOUSE, A0A0A6YY91_MOUSE, A0A0A6YWU2_MOUSE, Q61946_MOUSE	38.0674
GOTERM_BP_DIRECT	GO:0006864~pyrimidine nucleotide transport	2	0.357782	0.0517421	F6R114_MOUSE, D6RH79_MOUSE, Q8BZJ4_MOUSE, S2536_MOUSE, Q99KM7_MOUSE, S2533_MOUSE	38.0674
GOTERM_BP_DIRECT	GO:0050432~catecholamine secretion	2	0.357782	0.0517421	MECP2_MOUSE, CAPS1_MOUSE, J3QJW3_MOUSE, K4DI76_MOUSE, D3YY81_MOUSE, D3Z7U4_MOUSE	38.0674
GOTERM_BP_DIRECT	GO:0035494~SNARE complex disassembly	2	0.357782	0.0517421	D6RHL2_MOUSE, Q05DE5_MOUSE, SNAA_MOUSE, Q9CXX1_MOUSE, SNAB_MOUSE	38.0674
GOTERM_BP_DIRECT	GO:0010603~regulation of cytoplasmic mRNA processing body assembly	2	0.357782	0.0517421	E9Q5Q0_MOUSE, E9QM77_MOUSE, Q3TGG2_MOUSE, ATX2_MOUSE, ATX2L_MOUSE, A0A0U1RNZ9_MOUSE, Q3UX07_MOUSE, Q3TYH7_MOUSE, F6U2Q5_MOUSE, F6UTV7_MOUSE, F6U2C2_MOUSE, F6U209_MOUSE, F7B6X4_MOUSE, J3QP59_MOUSE, Q3UX51_MOUSE, A0A0G2JF15_MOUSE, A0A0U1RPL0_MOUSE, F6V8M6_MOUSE	38.0674
GOTERM_BP_DIRECT	GO:0001701~in utero embryonic development	14	2.50447	0.052453	Q2M4I9_MOUSE, F7CUV7_MOUSE, Q9Z2S5_MOUSE, F7CD65_MOUSE, Q3TLY0_MOUSE, PLOD3_MOUSE, E41L5_MOUSE, A1YYN2_MOUSE, Q60818_MOUSE, A1YYM7_MOUSE, E3SRG9_MOUSE, Q811W8_MOUSE, A1YYM5_MOUSE, E9PX60_MOUSE, Q1RMY2_MOUSE, G3V016_MOUSE, A2A4A6_MOUSE, Q91X22_MOUSE, E9Q7T0_MOUSE, D3YTR5_MOUSE, E9Q7E8_MOUSE, F6W3Q8_MOUSE, SRSF1_MOUSE, E9QK53_MOUSE, Q3KQQ4_MOUSE, A8Y5D5_MOUSE, B9EKY4_MOUSE, A1YYN1_MOUSE, E9PX88_MOU…	1.78242
GOTERM_BP_DIRECT	GO:0009790~embryo development	6	1.07335	0.0563946	MECP2_MOUSE, H7BXC3_MOUSE, G3UY14_MOUSE, G3UWV2_MOUSE, G3UYJ6_MOUSE, Q8BQP0_MOUSE, F2Z3W0_MOUSE, F2Z3X2_MOUSE, D3YY81_MOUSE, GTF2I_MOUSE, G3UYD7_MOUSE, Q3T9U3_MOUSE, BACD2_MOUSE, Q3UMP2_MOUSE, TSC1_MOUSE, G3UX27_MOUSE, Q3UHU8_MOUSE, G3UYD0_MOUSE, TPIS_MOUSE, G3UZU4_MOUSE, D3Z7U4_MOUSE, HMGCL_MOUSE, G3UWP6_MOUSE	2.89119
GOTERM_BP_DIRECT	GO:0007409~axonogenesis	7	1.25224	0.0624187	A1YYN6_MOUSE, E9Q700_MOUSE, A1YYM6_MOUSE, E9PXV8_MOUSE, Q543F6_MOUSE, E9Q7E6_MOUSE, NUMB_MOUSE, Q63848_MOUSE, Q05BE7_MOUSE, D3Z7I6_MOUSE, E9PX67_MOUSE, A1YYN2_MOUSE, A1YYN0_MOUSE, A1YYM7_MOUSE, Q9CT18_MOUSE, F2Z480_MOUSE, D6RJK5_MOUSE, D3Z1E8_MOUSE, A1YYM5_MOUSE, LRFN4_MOUSE, E9PX60_MOUSE, A1YYP0_MOUSE, F8WJ71_MOUSE, D3Z549_MOUSE, Q3UH86_MOUSE, A1YYN9_MOUSE, E9Q7T0_MOUSE, CDK5_MOUSE, E9Q5C2_MOUSE…	2.49039
GOTERM_BP_DIRECT	GO:0061025~membrane fusion	4	0.715564	0.063149	B0R030_MOUSE, A2AKH4_MOUSE, SNAA_MOUSE, Q9CXX1_MOUSE, SNAB_MOUSE, STX4_MOUSE, E9Q8A1_MOUSE, D6RJ29_MOUSE, D6RHL2_MOUSE, Q05DE5_MOUSE, SNP23_MOUSE, B0R029_MOUSE, Q9D3L3_MOUSE	4.35056
GOTERM_BP_DIRECT	GO:0021799~cerebral cortex radially oriented cell migration	3	0.536673	0.0645868	Q2M4H5_MOUSE, A0A0A0MQI4_MOUSE, MDGA1_MOUSE, E9PY95_MOUSE, E9PV12_MOUSE, Q8BYN6_MOUSE, Q05CY9_MOUSE, DAB1_MOUSE, Q8C423_MOUSE, F8VQI6_MOUSE, CUL5_MOUSE, E9Q6S8_MOUSE, D3Z499_MOUSE, F6XL33_MOUSE, F2Z465_MOUSE, Q78GU9_MOUSE, E9Q6Z0_MOUSE, B2RRQ8_MOUSE, G3X914_MOUSE, F7ABV5_MOUSE, F6VRL0_MOUSE	7.13763
GOTERM_BP_DIRECT	GO:0032402~melanosome transport	3	0.536673	0.0645868	D3YYG9_MOUSE, E9Q3M3_MOUSE, Q6NZM3_MOUSE, DCTN1_MOUSE, Q3TB96_MOUSE, Q05D38_MOUSE, Q4VA90_MOUSE, Q549X4_MOUSE, RB27A_MOUSE, D3Z2M9_MOUSE, Q3T9V8_MOUSE, Q544U7_MOUSE, D3YX34_MOUSE, Q3TRF1_MOUSE, E9Q586_MOUSE, RB27B_MOUSE	7.13763
GOTERM_BP_DIRECT	GO:0007156~homophilic cell adhesion via plasma membrane adhesion molecules	9	1.61002	0.0655809	F6Y3V0_MOUSE, PTPRF_MOUSE, Q3TT24_MOUSE, B7ZCD3_MOUSE, CAD24_MOUSE, A2AFG7_MOUSE, Q3V0J9_MOUSE, PCDG4_MOUSE, Q8C7Q6_MOUSE, Q684R0_MOUSE, Q64696_MOUSE, A0A0A6YVU6_MOUSE, Q684Q2_MOUSE, Q9CVT1_MOUSE, CADM4_MOUSE, CAD11_MOUSE, Q4U1Z0_MOUSE, PLXB3_MOUSE, F6S1X8_MOUSE, F7A5H7_MOUSE, CADH2_MOUSE, D3YYT0_MOUSE, CAD12_MOUSE, F6UIL7_MOUSE, L1CAM_MOUSE, Q4JFB8_MOUSE, Q3UIC2_MOUSE, A2AFG8_MOUSE, Q8BSI9_MOUSE…	2.10188
GOTERM_BP_DIRECT	GO:0002931~response to ischemia	4	0.715564	0.0676031	MP2K6_MOUSE, Q60521_MOUSE, A2AGS2_MOUSE, F6TRP3_MOUSE, PANX2_MOUSE, Q543Z5_MOUSE, HYOU1_MOUSE, P70273_MOUSE, Q3TCH2_MOUSE, UCHL1_MOUSE, Q8BP44_MOUSE, E0CYZ2_MOUSE, I7ENE7_MOUSE, F6TVW7_MOUSE, Q8VCI2_MOUSE, Q3UU57_MOUSE	4.22971
GOTERM_BP_DIRECT	GO:0016358~dendrite development	4	0.715564	0.0676031	MECP2_MOUSE, F6R7T6_MOUSE, Q3TP89_MOUSE, DAB1_MOUSE, E9Q175_MOUSE, E9Q3L1_MOUSE, V9GX76_MOUSE, MYO6_MOUSE, F2Z465_MOUSE, B2RWR8_MOUSE, V9GXM4_MOUSE, D3Z7U4_MOUSE, B8JJC6_MOUSE, Q8K0Y6_MOUSE, A0A0A0MQI4_MOUSE, D3YY81_MOUSE, Q8C423_MOUSE, E9PVU0_MOUSE, E9Q174_MOUSE, Q8BK95_MOUSE, F7BGL3_MOUSE, Q6A077_MOUSE, B2RRQ8_MOUSE, F6VRL0_MOUSE, TULP1_MOUSE	4.22971
GOTERM_BP_DIRECT	GO:0071354~cellular response to interleukin-6	3	0.536673	0.0719641	H3BJF2_MOUSE, PCLI1_MOUSE, TF65_MOUSE, PHB_MOUSE, H3BKK5_MOUSE, H3BJT8_MOUSE, A4L9Q2_MOUSE, Q3U3Q8_MOUSE, Q548Y4_MOUSE, Q3TPJ6_MOUSE, H3BJG6_MOUSE, Q5SQG5_MOUSE, Q3TV00_MOUSE, Q8BTL4_MOUSE, Q4U113_MOUSE	6.71777
GOTERM_BP_DIRECT	GO:0048712~negative regulation of astrocyte differentiation	3	0.536673	0.0719641	Q3TQJ1_MOUSE, MECP2_MOUSE, F6TK14_MOUSE, D3Z7U5_MOUSE, A0A0J9YU04_MOUSE, A0A0A0MQI4_MOUSE, A0A0J9YUX1_MOUSE, Q61563_MOUSE, Q3TQL1_MOUSE, Q3UPE1_MOUSE, Q99052_MOUSE, Q7TSI8_MOUSE, D3YY81_MOUSE, A0A0J9YTQ5_MOUSE, DAB1_MOUSE, Q8C423_MOUSE, A0A0J9YU20_MOUSE, F2Z465_MOUSE, FGFR3_MOUSE, B2RRQ8_MOUSE, E9QNJ9_MOUSE, D3Z7U4_MOUSE, A0A0J9YUB8_MOUSE, F6VRL0_MOUSE	6.71777
GOTERM_BP_DIRECT	GO:0000910~cytokinesis	4	0.715564	0.0721962	A0A0A6YVV4_MOUSE, Q8CCG5_MOUSE, RALB_MOUSE, MAP9_MOUSE, DCTN3_MOUSE, A0A0R4J2D7_MOUSE, Q9CXY0_MOUSE, A0A0A6YVR4_MOUSE, A0A0A6YXJ3_MOUSE, E9Q919_MOUSE, RALA_MOUSE, F6QC68_MOUSE	4.11539
GOTERM_BP_DIRECT	GO:0030177~positive regulation of Wnt signaling pathway	4	0.715564	0.0721962	A1YYN6_MOUSE, E9Q700_MOUSE, KC1E_MOUSE, A1YYM6_MOUSE, E9PXV8_MOUSE, E9Q7E6_MOUSE, Q9QUI3_MOUSE, E9PX67_MOUSE, A1YYN2_MOUSE, A1YYN0_MOUSE, F6VU53_MOUSE, A1YYM7_MOUSE, F2Z480_MOUSE, D6RJK5_MOUSE, A1YYM5_MOUSE, E9PX60_MOUSE, RENR_MOUSE, F7A4U8_MOUSE, A1YYP0_MOUSE, A1YYN9_MOUSE, E9Q7T0_MOUSE, E9Q5C2_MOUSE, A1YYN3_MOUSE, Q1XID4_MOUSE, E9Q7E8_MOUSE, E9QK53_MOUSE, B9EKY4_MOUSE, A1YYN1_MOUSE, E9PX88_MOUS…	4.11539
GOTERM_BP_DIRECT	GO:0051726~regulation of cell cycle	7	1.25224	0.0743319	E9Q6M7_MOUSE, Q3UHW0_MOUSE, A0A0A0MQJ4_MOUSE, Z4YN41_MOUSE, Q8BQP0_MOUSE, F2Z3W0_MOUSE, Q3TTW5_MOUSE, F2Z3X2_MOUSE, Q542F1_MOUSE, Q3TQ21_MOUSE, A0A0A0MQL5_MOUSE, Q3UR00_MOUSE, PP2AA_MOUSE, Q3U4T5_MOUSE, Q3TRI4_MOUSE, PHAR4_MOUSE, TSC1_MOUSE, A8WHM8_MOUSE, Q9D2H3_MOUSE, RACK1_MOUSE, PUM1_MOUSE, GA2L1_MOUSE, Q3TIP8_MOUSE, CLIC1_MOUSE	2.37921
GOTERM_BP_DIRECT	GO:0021847~ventricular zone neuroblast division	2	0.357782	0.0766024	A1YYN6_MOUSE, E9Q700_MOUSE, A1YYM6_MOUSE, E9PXV8_MOUSE, E9Q7E6_MOUSE, E9PX67_MOUSE, A1YYN2_MOUSE, Q60818_MOUSE, A1YYN0_MOUSE, J3QN85_MOUSE, A1YYM7_MOUSE, F2Z480_MOUSE, D6RJK5_MOUSE, A1YYM5_MOUSE, E9PX60_MOUSE, A1YYP0_MOUSE, A1YYN9_MOUSE, E9Q7T0_MOUSE, E9Q5C2_MOUSE, A1YYN3_MOUSE, E9Q7E8_MOUSE, Q61565_MOUSE, D3Z4V6_MOUSE, E9QK53_MOUSE, Q3TJ05_MOUSE, B9EKY4_MOUSE, A1YYN1_MOUSE, E9PX88_MOUSE, FGFR1_M…	25.3782
GOTERM_BP_DIRECT	GO:1900408~negative regulation of cellular response to oxidative stress	2	0.357782	0.0766024	NCOA7_MOUSE, B1H3M0_MOUSE, B9EIW5_MOUSE, Q3TM55_MOUSE, Q8CG81_MOUSE, Q8C715_MOUSE, OXR1_MOUSE, A9Q6S9_MOUSE, E9Q0A7_MOUSE	25.3782
GOTERM_BP_DIRECT	GO:0021697~cerebellar cortex formation	2	0.357782	0.0766024	Q63848_MOUSE, Q05C78_MOUSE, PTN11_MOUSE, Q543F6_MOUSE, Q9CT18_MOUSE, CDK5_MOUSE, A0A0G2JDL3_MOUSE	25.3782
GOTERM_BP_DIRECT	GO:0048609~multicellular organismal reproductive process	2	0.357782	0.0766024	Q63848_MOUSE, COMT_MOUSE, Q05C78_MOUSE, PTN11_MOUSE, Q9CT18_MOUSE, D3Z227_MOUSE	25.3782
GOTERM_BP_DIRECT	GO:0021769~orbitofrontal cortex development	2	0.357782	0.0766024	A1YYN6_MOUSE, E9Q700_MOUSE, A1YYM6_MOUSE, E9PXV8_MOUSE, E9Q7E6_MOUSE, E9PX67_MOUSE, A1YYN2_MOUSE, Q60818_MOUSE, A1YYN0_MOUSE, J3QN85_MOUSE, A1YYM7_MOUSE, F2Z480_MOUSE, D6RJK5_MOUSE, A1YYM5_MOUSE, E9PX60_MOUSE, A1YYP0_MOUSE, A1YYN9_MOUSE, E9Q7T0_MOUSE, E9Q5C2_MOUSE, A1YYN3_MOUSE, E9Q7E8_MOUSE, Q61565_MOUSE, D3Z4V6_MOUSE, E9QK53_MOUSE, Q3TJ05_MOUSE, B9EKY4_MOUSE, A1YYN1_MOUSE, E9PX88_MOUSE, FGFR1_M…	25.3782
GOTERM_BP_DIRECT	GO:0051153~regulation of striated muscle cell differentiation	2	0.357782	0.0766024	B7ZDF7_MOUSE, A0A087WSF0_MOUSE, B7ZDF3_MOUSE, Q3U2E0_MOUSE, B7ZDF4_MOUSE, HDAC5_MOUSE, Q3TSM2_MOUSE, Q3TNU8_MOUSE, Q80TW3_MOUSE, A0A087WQ92_MOUSE, A2AWS5_MOUSE, Q3UJF1_MOUSE, HDAC4_MOUSE, D6RH93_MOUSE, B7ZDF6_MOUSE, Q6P9T4_MOUSE, B7ZDF5_MOUSE	25.3782
GOTERM_BP_DIRECT	GO:0046827~positive regulation of protein export from nucleus	3	0.536673	0.0795977	EMD_MOUSE, Q3UW32_MOUSE, A2AM95_MOUSE, AN32B_MOUSE, Q3THM8_MOUSE, B7FAU5_MOUSE, I7HJS1_MOUSE, RANB3_MOUSE, D6RFS0_MOUSE	6.34456
GOTERM_BP_DIRECT	GO:0019752~carboxylic acid metabolic process	3	0.536673	0.0795977	A0A0N4SWC9_MOUSE, LDHB_MOUSE, MDHC_MOUSE, B1ATQ3_MOUSE, J3QMC8_MOUSE, MDHM_MOUSE, A0A0G2JGY4_MOUSE, Q5M8R7_MOUSE, A0A0G2JF23_MOUSE, D3Z7F0_MOUSE, A0A0N4SVV8_MOUSE	6.34456
GOTERM_BP_DIRECT	GO:0034599~cellular response to oxidative stress	5	0.894454	0.0831291	A2ABZ2_MOUSE, AL3B1_MOUSE, P5CR1_MOUSE, A2ABZ3_MOUSE, Q3TX25_MOUSE, Q3UNL5_MOUSE, A2ABZ0_MOUSE, KPCD1_MOUSE, Q3TJ21_MOUSE, Q3UTR5_MOUSE, P5CR2_MOUSE, Q3V4C9_MOUSE, Q3TMZ1_MOUSE, Q3U3J9_MOUSE, PNPT1_MOUSE, Q3TST0_MOUSE, Q3TN29_MOUSE	3.02122
GOTERM_BP_DIRECT	GO:2000045~regulation of G1/S transition of mitotic cell cycle	3	0.536673	0.0874691	H3BJF2_MOUSE, PCLI1_MOUSE, PSME1_MOUSE, Q99LN3_MOUSE, G3UXY0_MOUSE, Q5SVP3_MOUSE, H3BKK5_MOUSE, H3BJT8_MOUSE, E0CZ90_MOUSE, G3UWN9_MOUSE, G3X9K9_MOUSE, G3X9V0_MOUSE, Q3TPJ6_MOUSE, H3BJG6_MOUSE, G3UXR1_MOUSE, PSME2_MOUSE, Q5HZK3_MOUSE, G3UXZ5_MOUSE	6.01064
GOTERM_BP_DIRECT	GO:0051930~regulation of sensory perception of pain	4	0.715564	0.0918923	COMT_MOUSE, D3Z4V6_MOUSE, Q3TJ05_MOUSE, Q61947_MOUSE, FGFR1_MOUSE, Q8CIM9_MOUSE, D3Z227_MOUSE, A0A0N4SUZ2_MOUSE, O88682_MOUSE, E9QB01_MOUSE, A0A0A6YY91_MOUSE, Q60818_MOUSE, Q61948_MOUSE, J3QN85_MOUSE, Q3UFX6_MOUSE, MGLL_MOUSE, NCAM1_MOUSE, E9Q589_MOUSE, E9Q3B9_MOUSE, O08909_MOUSE, D3YW77_MOUSE, A0A0A6YY47_MOUSE, Q3UFN1_MOUSE, A0A0A6YWW5_MOUSE, Q61565_MOUSE, D3YYS6_MOUSE, Q8CBY7_MOUSE, A0A0A6YWU2_…	3.71389
GOTERM_BP_DIRECT	GO:0007612~learning	5	0.894454	0.0947854	MECP2_MOUSE, F2Z471_MOUSE, CTND2_MOUSE, E9QKH8_MOUSE, COMT_MOUSE, B7ZNF6_MOUSE, E9QNF7_MOUSE, Q3TPK9_MOUSE, Q3US07_MOUSE, D3YY81_MOUSE, Q3THL7_MOUSE, D3Z227_MOUSE, Q3UXX4_MOUSE, CNTP2_MOUSE, A0A140LJB1_MOUSE, VDAC1_MOUSE, A0A0G2JE70_MOUSE, Q3U8L7_MOUSE, Q3USD8_MOUSE, D3Z7U4_MOUSE, A3KMI8_MOUSE, Q3U6K8_MOUSE, Q3TIG8_MOUSE, Q3SYI6_MOUSE	2.88389
GOTERM_BP_DIRECT	GO:0021591~ventricular system development	3	0.536673	0.0955607	MECP2_MOUSE, Q3UW32_MOUSE, AN32B_MOUSE, DPCD_MOUSE, D3YY81_MOUSE, D3Z7U4_MOUSE	5.71011
GOTERM_BP_DIRECT	GO:0006164~purine nucleotide biosynthetic process	3	0.536673	0.0955607	PUR4_MOUSE, E9Q242_MOUSE, E9PZI0_MOUSE, Q8BVW7_MOUSE, G3UY86_MOUSE, Q14BH5_MOUSE, Q3TMB8_MOUSE, F6RUL9_MOUSE, Q0VEE0_MOUSE, A0A140LHU1_MOUSE, A0A0G2JFL8_MOUSE, 5NTD_MOUSE, PUR8_MOUSE, A0A0G2JFI8_MOUSE, E9Q3T7_MOUSE, E9Q0A0_MOUSE, Q3UTT7_MOUSE	5.71011
GOTERM_BP_DIRECT	GO:0009116~nucleoside metabolic process	3	0.536673	0.0955607	Q544K9_MOUSE, APT_MOUSE, UMPS_MOUSE, PRPS2_MOUSE, D6RJ62_MOUSE, Q3TVV7_MOUSE	5.71011
GOTERM_BP_DIRECT	GO:0007628~adult walking behavior	4	0.715564	0.09713	S4R1B3_MOUSE, B1H3M0_MOUSE, A0A0A0MQI4_MOUSE, HTRA2_MOUSE, D3YX27_MOUSE, Q3TXN0_MOUSE, S4R1A8_MOUSE, Q80V84_MOUSE, DAB1_MOUSE, Q8C423_MOUSE, Q8C715_MOUSE, OXR1_MOUSE, E9Q0A7_MOUSE, Q3TCH2_MOUSE, Q3UJR3_MOUSE, F2Z465_MOUSE, UCHL1_MOUSE, B2RRQ8_MOUSE, I7ENE7_MOUSE, F6XUR8_MOUSE, F6VRL0_MOUSE, F6TCV0_MOUSE, D3YX28_MOUSE	3.62546
GOTERM_BP_DIRECT	GO:0030855~epithelial cell differentiation	5	0.894454	0.0988335	A1YYN6_MOUSE, E9Q700_MOUSE, A1YYM6_MOUSE, E9PXV8_MOUSE, A0A0N4SV57_MOUSE, Q8C5G6_MOUSE, E9Q7E6_MOUSE, VDAC1_MOUSE, A0A0N4SW89_MOUSE, E9PX67_MOUSE, A1YYN2_MOUSE, A1YYN0_MOUSE, A1YYM7_MOUSE, F2Z480_MOUSE, D6RJK5_MOUSE, A1YYM5_MOUSE, E9PX60_MOUSE, F7ANV6_MOUSE, A1YYP0_MOUSE, Q8BSL2_MOUSE, A1YYN9_MOUSE, TOLIP_MOUSE, E9Q7T0_MOUSE, E9Q5C2_MOUSE, A1YYN3_MOUSE, E9Q7E8_MOUSE, Q3TIG8_MOUSE, F2Z471_MOUSE, A…	2.84085

## Sheet: Additional Table 7
Female GO-KEGG Pathways
Highlighted = Top 10
Category	Term	Count	%	PValue	Genes	Fold Enrichment
KEGG_PATHWAY	mmu01100:Metabolic pathways	63	11.2701	0.000807612	MDHC_MOUSE, APT_MOUSE, ENOPH_MOUSE, COQ3_MOUSE, ALD1_MOUSE, UCK1_MOUSE, RPAB1_MOUSE, PYC_MOUSE, MAAI_MOUSE, GRHPR_MOUSE, PGES2_MOUSE, AMPN_MOUSE, AUHM_MOUSE, P5CR2_MOUSE, PLPP_MOUSE, UMPS_MOUSE, PUR8_MOUSE, AL3B2_MOUSE, PPCS_MOUSE, ATPG_MOUSE, SUCB2_MOUSE, PUR4_MOUSE, ALD2_MOUSE, P5CR1_MOUSE, COX11_MOUSE, PLCG1_MOUSE, NDUA9_MOUSE, PA1B2_MOUSE, RDH12_MOUSE, IMPA1_MOUSE, 3HIDH_MOUSE, MDHM_MOUSE, HC…	1.48569
KEGG_PATHWAY	mmu05230:Central carbon metabolism in cancer	9	1.61002	0.00118961	ODPB_MOUSE, FGFR3_MOUSE, P85A_MOUSE, FGFR1_MOUSE, P55G_MOUSE, PDK1_MOUSE, SIR3_MOUSE, MK01_MOUSE, FGFR2_MOUSE	4.20835
KEGG_PATHWAY	mmu04014:Ras signaling pathway	18	3.22004	0.00159434	GBB4_MOUSE, TF65_MOUSE, PTN11_MOUSE, KSR2_MOUSE, RAB5B_MOUSE, PLCG1_MOUSE, FGFR1_MOUSE, P85A_MOUSE, P55G_MOUSE, GRB2_MOUSE, MK01_MOUSE, GBB1_MOUSE, RALB_MOUSE, FGFR3_MOUSE, RASL2_MOUSE, GBB2_MOUSE, RALA_MOUSE, FGFR2_MOUSE	2.35227
KEGG_PATHWAY	mmu00270:Cysteine and methionine metabolism	7	1.25224	0.00190101	MTNB_MOUSE, LDHB_MOUSE, MDHC_MOUSE, SPEE_MOUSE, ENOPH_MOUSE, MDHM_MOUSE, THTM_MOUSE	5.23706
KEGG_PATHWAY	mmu04910:Insulin signaling pathway	13	2.32558	0.00237255	PTPRF_MOUSE, FLOT2_MOUSE, P85A_MOUSE, P55G_MOUSE, GRB2_MOUSE, MK01_MOUSE, KAP0_MOUSE, AAKG2_MOUSE, TSC1_MOUSE, PP1G_MOUSE, RPTOR_MOUSE, AAKG1_MOUSE, KS6B1_MOUSE	2.77885
KEGG_PATHWAY	mmu01130:Biosynthesis of antibiotics	16	2.86225	0.00508379	MDHC_MOUSE, ODPB_MOUSE, SUCB2_MOUSE, PUR4_MOUSE, P5CR1_MOUSE, ACY1_MOUSE, PRPS2_MOUSE, G3P_MOUSE, P5CR2_MOUSE, LDHB_MOUSE, MDHM_MOUSE, GALM_MOUSE, P5CR3_MOUSE, HCD2_MOUSE, TPIS_MOUSE, PUR8_MOUSE	2.23746
KEGG_PATHWAY	mmu05212:Pancreatic cancer	8	1.43113	0.00559266	TF65_MOUSE, SMAD4_MOUSE, RALB_MOUSE, ARHG6_MOUSE, P85A_MOUSE, P55G_MOUSE, RALA_MOUSE, MK01_MOUSE	3.68321
KEGG_PATHWAY	mmu00010:Glycolysis / Gluconeogenesis	8	1.43113	0.00608323	LDHB_MOUSE, ODPB_MOUSE, AL3B1_MOUSE, GALM_MOUSE, TPIS_MOUSE, AL3B2_MOUSE, G3P_MOUSE, G3PT_MOUSE	3.6274
KEGG_PATHWAY	mmu04620:Toll-like receptor signaling pathway	10	1.78891	0.00630657	TF65_MOUSE, TOLIP_MOUSE, MP2K3_MOUSE, MP2K6_MOUSE, MYD88_MOUSE, TAB1_MOUSE, P85A_MOUSE, P55G_MOUSE, M3K7_MOUSE, MK01_MOUSE	2.96298
KEGG_PATHWAY	mmu04666:Fc gamma R-mediated phagocytosis	9	1.61002	0.00662818	ASAP2_MOUSE, FCGR1_MOUSE, PLCG1_MOUSE, P85A_MOUSE, P55G_MOUSE, ARPC2_MOUSE, MK01_MOUSE, KS6B1_MOUSE, LIMK1_MOUSE	3.20636
KEGG_PATHWAY	mmu00620:Pyruvate metabolism	6	1.07335	0.00896755	LDHB_MOUSE, MDHC_MOUSE, ODPB_MOUSE, MDHM_MOUSE, PYC_MOUSE, GRHPR_MOUSE	4.60401
KEGG_PATHWAY	mmu04152:AMPK signaling pathway	11	1.9678	0.0101366	PP2AA_MOUSE, AAKG2_MOUSE, TSC1_MOUSE, PP2AB_MOUSE, P85A_MOUSE, P55G_MOUSE, ELAV1_MOUSE, RPTOR_MOUSE, AAKG1_MOUSE, M3K7_MOUSE, KS6B1_MOUSE	2.57177
KEGG_PATHWAY	mmu04015:Rap1 signaling pathway	15	2.68336	0.0119498	MP2K6_MOUSE, PLCG1_MOUSE, FGFR1_MOUSE, P85A_MOUSE, P55G_MOUSE, KPCD1_MOUSE, MK01_MOUSE, MAGI1_MOUSE, RALB_MOUSE, MP2K3_MOUSE, FGFR3_MOUSE, RALA_MOUSE, BCAR1_MOUSE, FGFR2_MOUSE, MAGI3_MOUSE	2.09762
KEGG_PATHWAY	mmu01230:Biosynthesis of amino acids	8	1.43113	0.0129125	P5CR1_MOUSE, P5CR3_MOUSE, ACY1_MOUSE, TPIS_MOUSE, PYC_MOUSE, PRPS2_MOUSE, G3P_MOUSE, P5CR2_MOUSE	3.15011
KEGG_PATHWAY	mmu04144:Endocytosis	17	3.04114	0.0134506	CAZA2_MOUSE, ASAP2_MOUSE, RAB5B_MOUSE, RABE1_MOUSE, ARPC2_MOUSE, ARFG2_MOUSE, IQEC1_MOUSE, EPN2_MOUSE, FGFR3_MOUSE, NED4L_MOUSE, IQEC2_MOUSE, ARBK1_MOUSE, CAZA1_MOUSE, CHM1A_MOUSE, UBP8_MOUSE, GIT2_MOUSE, FGFR2_MOUSE	1.94921
KEGG_PATHWAY	mmu03015:mRNA surveillance pathway	9	1.61002	0.0143581	THOC4_MOUSE, PP2AA_MOUSE, CPSF5_MOUSE, PP1G_MOUSE, PP2AB_MOUSE, CSTF3_MOUSE, ALRF2_MOUSE, WDR82_MOUSE, NCBP1_MOUSE	2.80557
KEGG_PATHWAY	mmu01200:Carbon metabolism	10	1.78891	0.0149996	ESTD_MOUSE, MDHC_MOUSE, SUCB2_MOUSE, ODPB_MOUSE, MDHM_MOUSE, DHE3_MOUSE, TPIS_MOUSE, PYC_MOUSE, PRPS2_MOUSE, G3P_MOUSE	2.57983
KEGG_PATHWAY	mmu03050:Proteasome	6	1.07335	0.0162032	PSA6_MOUSE, PSME1_MOUSE, PRS6B_MOUSE, PSA1_MOUSE, PSME2_MOUSE, PSA4_MOUSE	3.99014
KEGG_PATHWAY	mmu04066:HIF-1 signaling pathway	9	1.61002	0.0200537	TF65_MOUSE, ODPB_MOUSE, PLCG1_MOUSE, P85A_MOUSE, P55G_MOUSE, PDK1_MOUSE, G3P_MOUSE, MK01_MOUSE, KS6B1_MOUSE	2.64054
KEGG_PATHWAY	mmu00020:Citrate cycle (TCA cycle)	5	0.894454	0.0207276	MDHC_MOUSE, SUCB2_MOUSE, ODPB_MOUSE, MDHM_MOUSE, PYC_MOUSE	4.67595
KEGG_PATHWAY	mmu00040:Pentose and glucuronate interconversions	5	0.894454	0.0229872	CRYL1_MOUSE, ALD2_MOUSE, ALD1_MOUSE, ALDR_MOUSE, DCXR_MOUSE	4.53425
KEGG_PATHWAY	mmu04380:Osteoclast differentiation	10	1.78891	0.024384	TF65_MOUSE, MP2K6_MOUSE, FCGR1_MOUSE, TAB1_MOUSE, P85A_MOUSE, PP2BB_MOUSE, P55G_MOUSE, GRB2_MOUSE, M3K7_MOUSE, MK01_MOUSE	2.37508
KEGG_PATHWAY	mmu04664:Fc epsilon RI signaling pathway	7	1.25224	0.025102	MP2K3_MOUSE, MP2K6_MOUSE, PLCG1_MOUSE, P85A_MOUSE, P55G_MOUSE, GRB2_MOUSE, MK01_MOUSE	3.08062
KEGG_PATHWAY	mmu04360:Axon guidance	10	1.78891	0.0278727	SRGP3_MOUSE, CDK5_MOUSE, DCC_MOUSE, PLXB3_MOUSE, L1CAM_MOUSE, PP2BB_MOUSE, PLXB1_MOUSE, SRGP1_MOUSE, MK01_MOUSE, LIMK1_MOUSE	2.31985
KEGG_PATHWAY	mmu04931:Insulin resistance	9	1.61002	0.0299326	TF65_MOUSE, PTPRF_MOUSE, AAKG2_MOUSE, PP1G_MOUSE, PTN11_MOUSE, P85A_MOUSE, P55G_MOUSE, AAKG1_MOUSE, KS6B1_MOUSE	2.4485
KEGG_PATHWAY	mmu05220:Chronic myeloid leukemia	7	1.25224	0.032141	TF65_MOUSE, SMAD4_MOUSE, PTN11_MOUSE, P85A_MOUSE, P55G_MOUSE, GRB2_MOUSE, MK01_MOUSE	2.90948
KEGG_PATHWAY	mmu03040:Spliceosome	10	1.78891	0.0330522	THOC4_MOUSE, ROA1_MOUSE, RBM22_MOUSE, TRA2A_MOUSE, SRSF7_MOUSE, ALRF2_MOUSE, SRSF1_MOUSE, U2AF1_MOUSE, NCBP1_MOUSE, SF3B1_MOUSE	2.25008
KEGG_PATHWAY	mmu05221:Acute myeloid leukemia	6	1.07335	0.0378165	TF65_MOUSE, P85A_MOUSE, P55G_MOUSE, GRB2_MOUSE, MK01_MOUSE, KS6B1_MOUSE	3.20636
KEGG_PATHWAY	mmu04960:Aldosterone-regulated sodium reabsorption	5	0.894454	0.0429151	AT1A4_MOUSE, P85A_MOUSE, NED4L_MOUSE, P55G_MOUSE, MK01_MOUSE	3.74076
KEGG_PATHWAY	mmu04151:PI3K-Akt signaling pathway	19	3.39893	0.0446496	GBB4_MOUSE, TF65_MOUSE, 1433G_MOUSE, FGFR1_MOUSE, ITA6_MOUSE, P85A_MOUSE, P55G_MOUSE, GRB2_MOUSE, MK01_MOUSE, GBB1_MOUSE, PP2AA_MOUSE, 1433E_MOUSE, TSC1_MOUSE, FGFR3_MOUSE, PP2AB_MOUSE, GBB2_MOUSE, RPTOR_MOUSE, KS6B1_MOUSE, FGFR2_MOUSE	1.61993
KEGG_PATHWAY	mmu05168:Herpes simplex infection	13	2.32558	0.0446552	TF65_MOUSE, HCFC1_MOUSE, MYD88_MOUSE, PTN11_MOUSE, SRSF7_MOUSE, ALRF2_MOUSE, GTF2I_MOUSE, THOC4_MOUSE, PP1G_MOUSE, TAB1_MOUSE, CSK2B_MOUSE, SRSF1_MOUSE, M3K7_MOUSE	1.87038
KEGG_PATHWAY	mmu04150:mTOR signaling pathway	6	1.07335	0.0457905	TSC1_MOUSE, P85A_MOUSE, P55G_MOUSE, RPTOR_MOUSE, MK01_MOUSE, KS6B1_MOUSE	3.04333
KEGG_PATHWAY	mmu05410:Hypertrophic cardiomyopathy (HCM)	7	1.25224	0.0473155	EMD_MOUSE, AAKG2_MOUSE, SGCD_MOUSE, CACB2_MOUSE, ITA6_MOUSE, AAKG1_MOUSE, CACB1_MOUSE	2.65168
KEGG_PATHWAY	mmu04660:T cell receptor signaling pathway	8	1.43113	0.0508817	TF65_MOUSE, PLCG1_MOUSE, P85A_MOUSE, PP2BB_MOUSE, P55G_MOUSE, GRB2_MOUSE, M3K7_MOUSE, MK01_MOUSE	2.37038
KEGG_PATHWAY	mmu04810:Regulation of actin cytoskeleton	13	2.32558	0.0518289	MYPT1_MOUSE, FGFR1_MOUSE, ITA6_MOUSE, P85A_MOUSE, P55G_MOUSE, ARPC2_MOUSE, MK01_MOUSE, LIMK1_MOUSE, PP1G_MOUSE, ARHG6_MOUSE, FGFR3_MOUSE, BCAR1_MOUSE, FGFR2_MOUSE	1.82647
KEGG_PATHWAY	mmu05145:Toxoplasmosis	8	1.43113	0.0603455	TF65_MOUSE, MP2K3_MOUSE, MP2K6_MOUSE, MYD88_MOUSE, TAB1_MOUSE, ITA6_MOUSE, M3K7_MOUSE, MK01_MOUSE	2.28008
KEGG_PATHWAY	mmu05140:Leishmaniasis	6	1.07335	0.0611488	TF65_MOUSE, FCGR1_MOUSE, MYD88_MOUSE, TAB1_MOUSE, M3K7_MOUSE, MK01_MOUSE	2.80557
KEGG_PATHWAY	mmu04668:TNF signaling pathway	8	1.43113	0.070824	TF65_MOUSE, MP2K3_MOUSE, MP2K6_MOUSE, TAB1_MOUSE, P85A_MOUSE, P55G_MOUSE, M3K7_MOUSE, MK01_MOUSE	2.19641
KEGG_PATHWAY	mmu05412:Arrhythmogenic right ventricular cardiomyopathy (ARVC)	6	1.07335	0.0716058	EMD_MOUSE, SGCD_MOUSE, CACB2_MOUSE, ITA6_MOUSE, CACB1_MOUSE, CADH2_MOUSE	2.67995
KEGG_PATHWAY	mmu05215:Prostate cancer	7	1.25224	0.0724294	TF65_MOUSE, P85A_MOUSE, FGFR1_MOUSE, P55G_MOUSE, GRB2_MOUSE, MK01_MOUSE, FGFR2_MOUSE	2.38048
KEGG_PATHWAY	mmu04010:MAPK signaling pathway	14	2.50447	0.0754696	TF65_MOUSE, MP2K6_MOUSE, FGFR1_MOUSE, PP2BB_MOUSE, GRB2_MOUSE, MK01_MOUSE, TAOK2_MOUSE, MP2K3_MOUSE, TAB1_MOUSE, CACB2_MOUSE, FGFR3_MOUSE, CACB1_MOUSE, M3K7_MOUSE, FGFR2_MOUSE	1.66918
KEGG_PATHWAY	mmu04728:Dopaminergic synapse	9	1.61002	0.078096	GBB1_MOUSE, GBB4_MOUSE, PP2AA_MOUSE, COMT_MOUSE, PP1G_MOUSE, PP2AB_MOUSE, GBB2_MOUSE, PP2BB_MOUSE, CALY_MOUSE	2.00996
KEGG_PATHWAY	mmu04710:Circadian rhythm	4	0.715564	0.0827206	AAKG2_MOUSE, KC1E_MOUSE, AAKG1_MOUSE, KC1D_MOUSE	3.86143
KEGG_PATHWAY	mmu04662:B cell receptor signaling pathway	6	1.07335	0.0829821	TF65_MOUSE, P85A_MOUSE, PP2BB_MOUSE, P55G_MOUSE, GRB2_MOUSE, MK01_MOUSE	2.56509
KEGG_PATHWAY	mmu05014:Amyotrophic lateral sclerosis (ALS)	5	0.894454	0.0888472	NFM_MOUSE, CCS_MOUSE, MP2K3_MOUSE, MP2K6_MOUSE, PP2BB_MOUSE	2.93393
KEGG_PATHWAY	mmu00052:Galactose metabolism	4	0.715564	0.0891336	ALD2_MOUSE, GALM_MOUSE, ALD1_MOUSE, ALDR_MOUSE	3.74076
KEGG_PATHWAY	mmu04520:Adherens junction	6	1.07335	0.0910672	PTPRF_MOUSE, SMAD4_MOUSE, FGFR1_MOUSE, CSK2B_MOUSE, M3K7_MOUSE, MK01_MOUSE	2.49384

## Sheet: Additional Table 8
Male GO_MF
Highlighted = Top 10
Category	Term	Count	%	PValue	Genes	Fold Enrichment
GOTERM_MF_DIRECT	GO:0005524~ATP binding	39	16.25	7.79624e-07	KI16B_MOUSE, UB2L3_MOUSE, WRIP1_MOUSE, WNK3_MOUSE, NRBP2_MOUSE, BMPR2_MOUSE, KIF4_MOUSE, SYCM_MOUSE, XYLK_MOUSE, NRBP_MOUSE, ATAD3_MOUSE, GLPK2_MOUSE, KGP2_MOUSE, GLPK_MOUSE, MYO19_MOUSE, SYWM_MOUSE, UBC9_MOUSE, SYNM_MOUSE, MINK1_MOUSE, MARK3_MOUSE, RIR1_MOUSE, SYRC_MOUSE, P53_MOUSE, PRS4_MOUSE, UBC12_MOUSE, NDKA_MOUSE, KIF3A_MOUSE, WNK4_MOUSE, SYFB_MOUSE, AGK_MOUSE, HS90A_MOUSE, DNJA1_MOUSE, TCP…	2.36382
GOTERM_MF_DIRECT	GO:0000166~nucleotide binding	43	17.9167	8.93084e-06	HNRPQ_MOUSE, KI16B_MOUSE, UB2L3_MOUSE, RAP1B_MOUSE, WRIP1_MOUSE, WNK3_MOUSE, ESRP1_MOUSE, BMPR2_MOUSE, KIF4_MOUSE, SYCM_MOUSE, XYLK_MOUSE, NELFE_MOUSE, ATAD3_MOUSE, GLPK2_MOUSE, ATLA3_MOUSE, KGP2_MOUSE, GLPK_MOUSE, RRAS2_MOUSE, MYO19_MOUSE, SYWM_MOUSE, UBC9_MOUSE, SYNM_MOUSE, RAP1A_MOUSE, MINK1_MOUSE, MARK3_MOUSE, RIR1_MOUSE, SYRC_MOUSE, PRS4_MOUSE, UBC12_MOUSE, NDKA_MOUSE, KIF3A_MOUSE, WNK4_MOUS…	2.02874
GOTERM_MF_DIRECT	GO:0044822~poly(A) RNA binding	30	12.5	1.05382e-05	HNRPQ_MOUSE, PRDX1_MOUSE, UB2L3_MOUSE, LC7L3_MOUSE, IF4G3_MOUSE, HUWE1_MOUSE, FA98A_MOUSE, PRPF3_MOUSE, NELFE_MOUSE, YBOX3_MOUSE, SUMO1_MOUSE, RL31_MOUSE, CCD47_MOUSE, UBC9_MOUSE, RL36_MOUSE, HNRPK_MOUSE, SCG3_MOUSE, PRS4_MOUSE, KHDR1_MOUSE, NDKA_MOUSE, LC7L2_MOUSE, PTBP2_MOUSE, HS90A_MOUSE, IF4A3_MOUSE, RM43_MOUSE, MBNL1_MOUSE, NOP16_MOUSE, RED1_MOUSE, SMAG2_MOUSE, RL35_MOUSE	2.462
GOTERM_MF_DIRECT	GO:0003729~mRNA binding	9	3.75	0.000165272	DYR_MOUSE, IF4A3_MOUSE, ESRP1_MOUSE, LC7L3_MOUSE, LC7L2_MOUSE, RL35_MOUSE, SMAG2_MOUSE, PTBP2_MOUSE, HS90A_MOUSE	5.78917
GOTERM_MF_DIRECT	GO:0031625~ubiquitin protein ligase binding	12	5	0.000290383	UB2V2_MOUSE, DNJA1_MOUSE, UB2L3_MOUSE, GBRL2_MOUSE, PRDX6_MOUSE, BAG6_MOUSE, NDUS2_MOUSE, CUL1_MOUSE, UB2V1_MOUSE, SUMO1_MOUSE, P53_MOUSE, BECN1_MOUSE	3.85945
GOTERM_MF_DIRECT	GO:0008143~poly(A) binding	4	1.66667	0.000772582	HNRPQ_MOUSE, KHDR2_MOUSE, IF4A3_MOUSE, KHDR1_MOUSE	21.4918
GOTERM_MF_DIRECT	GO:0004812~aminoacyl-tRNA ligase activity	5	2.08333	0.000832146	SYCM_MOUSE, SYRC_MOUSE, SYWM_MOUSE, SYFB_MOUSE, SYNM_MOUSE	11.7103
GOTERM_MF_DIRECT	GO:0051082~unfolded protein binding	6	2.5	0.00135408	TCPH_MOUSE, DNJA1_MOUSE, PFD2_MOUSE, DJB11_MOUSE, PFD5_MOUSE, HS90A_MOUSE	7.30723
GOTERM_MF_DIRECT	GO:0032795~heterotrimeric G-protein binding	3	1.25	0.00239021	CETN2_MOUSE, CETN4_MOUSE, CETN1_MOUSE	39.1458
GOTERM_MF_DIRECT	GO:0042802~identical protein binding	16	6.66667	0.00355545	PDCD6_MOUSE, WRIP1_MOUSE, P53_MOUSE, KHDR1_MOUSE, NDKA_MOUSE, CYTC_MOUSE, PRPF3_MOUSE, LMAN1_MOUSE, HS90A_MOUSE, ALBU_MOUSE, TCPH_MOUSE, CHM4B_MOUSE, ATLA3_MOUSE, PPP5_MOUSE, CLD11_MOUSE, PAK2_MOUSE	2.33831
GOTERM_MF_DIRECT	GO:0019869~chloride channel inhibitor activity	3	1.25	0.00403912	WNK1_MOUSE, WNK3_MOUSE, WNK4_MOUSE	30.4468
GOTERM_MF_DIRECT	GO:0008017~microtubule binding	8	3.33333	0.00639004	CETN2_MOUSE, KI16B_MOUSE, CAMP1_MOUSE, MTAP2_MOUSE, PPP5_MOUSE, KIF3A_MOUSE, CETN1_MOUSE, KIF4_MOUSE	3.65361
GOTERM_MF_DIRECT	GO:0016651~oxidoreductase activity, acting on NAD(P)H	3	1.25	0.00724767	NDUS2_MOUSE, NDUA5_MOUSE, NDUS4_MOUSE	22.8351
GOTERM_MF_DIRECT	GO:0051087~chaperone binding	5	2.08333	0.009082	ALBU_MOUSE, UBL4A_MOUSE, DNJA1_MOUSE, DJC10_MOUSE, P53_MOUSE	6.08935
GOTERM_MF_DIRECT	GO:0005515~protein binding	60	25	0.00967917	UB2L3_MOUSE, PDCD6_MOUSE, BAG6_MOUSE, IF4G3_MOUSE, JIP3_MOUSE, KGP2_MOUSE, RRAS2_MOUSE, CCD22_MOUSE, BECN1_MOUSE, DPYL4_MOUSE, SNAPN_MOUSE, HNRPK_MOUSE, RIR1_MOUSE, P53_MOUSE, PTBP2_MOUSE, CPNE6_MOUSE, UB2V2_MOUSE, DNJA1_MOUSE, IMA3_MOUSE, BACE1_MOUSE, CHM4B_MOUSE, RAC3_MOUSE, BORC6_MOUSE, ACAP2_MOUSE, SYT2_MOUSE, GAPD1_MOUSE, EPMIP_MOUSE, DOCK1_MOUSE, SMAG2_MOUSE, SE1L1_MOUSE, PAK2_MOUSE, NHRF2_…	1.3393
GOTERM_MF_DIRECT	GO:0098641~cadherin binding involved in cell-cell adhesion	9	3.75	0.0115787	NHRF2_MOUSE, PRDX1_MOUSE, CHM4B_MOUSE, HNRPK_MOUSE, PRDX6_MOUSE, SYRC_MOUSE, EF1G_MOUSE, GAPD1_MOUSE, PAK2_MOUSE	2.94646
GOTERM_MF_DIRECT	GO:0017137~Rab GTPase binding	6	2.5	0.014363	KI16B_MOUSE, MOBP_MOUSE, VPS52_MOUSE, ACAP2_MOUSE, KIF3A_MOUSE, GOGA5_MOUSE	4.18353
GOTERM_MF_DIRECT	GO:0016491~oxidoreductase activity	14	5.83333	0.0151721	P4HTM_MOUSE, ACAD9_MOUSE, PRDX1_MOUSE, DJC10_MOUSE, PRDX6_MOUSE, NDUS2_MOUSE, RIR1_MOUSE, MSRB2_MOUSE, DYR_MOUSE, SDHA_MOUSE, GPDM_MOUSE, A16A1_MOUSE, ADAS_MOUSE, CATA_MOUSE	2.11716
GOTERM_MF_DIRECT	GO:0016301~kinase activity	15	6.25	0.0158307	MINK1_MOUSE, MARK3_MOUSE, WNK3_MOUSE, NDKA_MOUSE, WNK4_MOUSE, BMPR2_MOUSE, AGK_MOUSE, JIP3_MOUSE, XYLK_MOUSE, NDKB_MOUSE, GLPK2_MOUSE, WNK1_MOUSE, KGP2_MOUSE, GLPK_MOUSE, PAK2_MOUSE	2.0328
GOTERM_MF_DIRECT	GO:0016740~transferase activity	26	10.8333	0.0174062	HMCS1_MOUSE, UB2L3_MOUSE, WNK3_MOUSE, ELP3_MOUSE, HUWE1_MOUSE, TALDO_MOUSE, BMPR2_MOUSE, SCOT1_MOUSE, CGT_MOUSE, XYLK_MOUSE, GLPK2_MOUSE, NAMPT_MOUSE, KGP2_MOUSE, GLPK_MOUSE, MINK1_MOUSE, MARK3_MOUSE, NDKA_MOUSE, GL1D1_MOUSE, WNK4_MOUSE, AGK_MOUSE, NDKB_MOUSE, WNK1_MOUSE, MET22_MOUSE, ADAS_MOUSE, GDPP1_MOUSE, PAK2_MOUSE	1.61335
GOTERM_MF_DIRECT	GO:0016874~ligase activity	10	4.16667	0.0178524	SYCM_MOUSE, MCCB_MOUSE, SYRC_MOUSE, RN114_MOUSE, UBC12_MOUSE, HUWE1_MOUSE, SYWM_MOUSE, SYFB_MOUSE, UBC9_MOUSE, SYNM_MOUSE	2.52321
GOTERM_MF_DIRECT	GO:0004674~protein serine/threonine kinase activity	11	4.58333	0.0190321	MINK1_MOUSE, NRBP_MOUSE, MARK3_MOUSE, NDKB_MOUSE, WNK1_MOUSE, WNK3_MOUSE, KGP2_MOUSE, NRBP2_MOUSE, WNK4_MOUSE, BMPR2_MOUSE, PAK2_MOUSE	2.34753
GOTERM_MF_DIRECT	GO:0009055~electron carrier activity	4	1.66667	0.019997	ACAD9_MOUSE, CYC_MOUSE, CYC2_MOUSE, SDHA_MOUSE	6.89361
GOTERM_MF_DIRECT	GO:0016773~phosphotransferase activity, alcohol group as acceptor	3	1.25	0.0216289	XYLK_MOUSE, GLPK2_MOUSE, GLPK_MOUSE	13.0486
GOTERM_MF_DIRECT	GO:0003723~RNA binding	16	6.66667	0.023698	HNRPQ_MOUSE, KHDR2_MOUSE, HNRPK_MOUSE, ESRP1_MOUSE, KHDR1_MOUSE, IF4G3_MOUSE, SYFB_MOUSE, PTBP2_MOUSE, DYR_MOUSE, NELFE_MOUSE, YBOX3_MOUSE, CSDC2_MOUSE, PPP5_MOUSE, MBNL1_MOUSE, RED1_MOUSE, SMAG2_MOUSE	1.87365
GOTERM_MF_DIRECT	GO:0019899~enzyme binding	10	4.16667	0.0251717	ALBU_MOUSE, NDKB_MOUSE, BACE1_MOUSE, P53_MOUSE, NDKA_MOUSE, RANB9_MOUSE, LC7L2_MOUSE, UBC9_MOUSE, ANK1_MOUSE, CATA_MOUSE	2.37865
GOTERM_MF_DIRECT	GO:0016209~antioxidant activity	3	1.25	0.0278288	PRDX1_MOUSE, PRDX6_MOUSE, CATA_MOUSE	11.4175
GOTERM_MF_DIRECT	GO:0031683~G-protein beta/gamma-subunit complex binding	3	1.25	0.0300356	CETN2_MOUSE, CETN4_MOUSE, CETN1_MOUSE	10.9608
GOTERM_MF_DIRECT	GO:0008144~drug binding	5	2.08333	0.0341324	DYR_MOUSE, ALBU_MOUSE, HMCS1_MOUSE, NDKB_MOUSE, NAMPT_MOUSE	4.07769
GOTERM_MF_DIRECT	GO:0017124~SH3 domain binding	5	2.08333	0.0401403	CXA1_MOUSE, KHDR2_MOUSE, WIPF3_MOUSE, KHDR1_MOUSE, DOCK1_MOUSE	3.87035
GOTERM_MF_DIRECT	GO:0004370~glycerol kinase activity	2	0.833333	0.0428601	GLPK2_MOUSE, GLPK_MOUSE	45.6702
GOTERM_MF_DIRECT	GO:0004601~peroxidase activity	3	1.25	0.0446273	PRDX1_MOUSE, PRDX6_MOUSE, CATA_MOUSE	8.83939
GOTERM_MF_DIRECT	GO:0030507~spectrin binding	3	1.25	0.0446273	CAMP1_MOUSE, KIF3A_MOUSE, ANK1_MOUSE	8.83939
GOTERM_MF_DIRECT	GO:0061631~ubiquitin conjugating enzyme activity	3	1.25	0.0472692	UB2V2_MOUSE, UB2L3_MOUSE, UB2V1_MOUSE	8.56315
GOTERM_MF_DIRECT	GO:0042803~protein homodimerization activity	15	6.25	0.0539848	HMCS1_MOUSE, PRDX1_MOUSE, SNF8_MOUSE, PDCD6_MOUSE, SGTA_MOUSE, CHM4C_MOUSE, SCOT1_MOUSE, HS90A_MOUSE, NRBP_MOUSE, CHM4B_MOUSE, NAMPT_MOUSE, KGP2_MOUSE, RED1_MOUSE, CATA_MOUSE, GOGA5_MOUSE	1.71692
GOTERM_MF_DIRECT	GO:0030544~Hsp70 protein binding	3	1.25	0.0555235	DNJA1_MOUSE, DJC10_MOUSE, BAG6_MOUSE	7.82917
GOTERM_MF_DIRECT	GO:0008137~NADH dehydrogenase (ubiquinone) activity	3	1.25	0.0555235	NDUS2_MOUSE, NDUA5_MOUSE, NDUS4_MOUSE	7.82917
GOTERM_MF_DIRECT	GO:0004721~phosphoprotein phosphatase activity	5	2.08333	0.0655939	PPM1H_MOUSE, PTN23_MOUSE, PPM1M_MOUSE, PPP5_MOUSE, PPM1J_MOUSE	3.28562
GOTERM_MF_DIRECT	GO:0043021~ribonucleoprotein complex binding	3	1.25	0.0672413	HNRPK_MOUSE, IF4A3_MOUSE, RL35_MOUSE	7.02618
GOTERM_MF_DIRECT	GO:0016887~ATPase activity	6	2.5	0.0679927	KI16B_MOUSE, WRIP1_MOUSE, ATP5L_MOUSE, MYO19_MOUSE, KIF3A_MOUSE, HS90A_MOUSE	2.74021
GOTERM_MF_DIRECT	GO:0051117~ATPase binding	4	1.66667	0.0713332	HNRPK_MOUSE, DJC10_MOUSE, NSF1C_MOUSE, ANK1_MOUSE	4.15183
GOTERM_MF_DIRECT	GO:0003824~catalytic activity	10	4.16667	0.0791806	HMCS1_MOUSE, PPM1H_MOUSE, PRDX6_MOUSE, ELP3_MOUSE, RIR1_MOUSE, PPM1M_MOUSE, ADAS_MOUSE, PPM1J_MOUSE, TALDO_MOUSE, PAK2_MOUSE	1.9069
GOTERM_MF_DIRECT	GO:0005085~guanyl-nucleotide exchange factor activity	5	2.08333	0.0913836	PREX1_MOUSE, GDPP1_MOUSE, DEN4B_MOUSE, GAPD1_MOUSE, DOCK1_MOUSE	2.92757
GOTERM_MF_DIRECT	GO:0019215~intermediate filament binding	2	0.833333	0.0938742	NDKB_MOUSE, NDKA_MOUSE	20.2978

## Sheet: Additional Table 9
Male GO_BP
Highlighted = Top 10
Category	Term	Count	%	PValue	Genes	Fold Enrichment
GOTERM_BP_DIRECT	GO:0055114~oxidation-reduction process	19	7.91667	0.000250948	P4HTM_MOUSE, ACAD9_MOUSE, CYC_MOUSE, PRDX1_MOUSE, CYC2_MOUSE, DJC10_MOUSE, PRDX6_MOUSE, NDUS2_MOUSE, NDUB3_MOUSE, RIR1_MOUSE, NDUA5_MOUSE, MSRB2_MOUSE, NDUS4_MOUSE, DYR_MOUSE, SDHA_MOUSE, GPDM_MOUSE, A16A1_MOUSE, ADAS_MOUSE, CATA_MOUSE	2.689
GOTERM_BP_DIRECT	GO:0006376~mRNA splice site selection	4	1.66667	0.000458998	MBNL1_MOUSE, LC7L3_MOUSE, LC7L2_MOUSE, PTBP2_MOUSE	25.5125
GOTERM_BP_DIRECT	GO:0006397~mRNA processing	12	5	0.000567534	HNRPQ_MOUSE, KHDR2_MOUSE, HNRPK_MOUSE, IF4A3_MOUSE, CSDC2_MOUSE, ESRP1_MOUSE, MBNL1_MOUSE, LC7L3_MOUSE, KHDR1_MOUSE, RED1_MOUSE, PRPF3_MOUSE, PTBP2_MOUSE	3.56541
GOTERM_BP_DIRECT	GO:0019563~glycerol catabolic process	3	1.25	0.00105335	GLPK2_MOUSE, GPDM_MOUSE, GLPK_MOUSE	57.4032
GOTERM_BP_DIRECT	GO:0090188~negative regulation of pancreatic juice secretion	3	1.25	0.00105335	WNK1_MOUSE, WNK3_MOUSE, WNK4_MOUSE	57.4032
GOTERM_BP_DIRECT	GO:2000021~regulation of ion homeostasis	3	1.25	0.00156921	WNK1_MOUSE, WNK3_MOUSE, WNK4_MOUSE	47.836
GOTERM_BP_DIRECT	GO:0032414~positive regulation of ion transmembrane transporter activity	3	1.25	0.00218188	WNK1_MOUSE, WNK3_MOUSE, WNK4_MOUSE	41.0023
GOTERM_BP_DIRECT	GO:0006072~glycerol-3-phosphate metabolic process	3	1.25	0.0028893	GLPK2_MOUSE, GPDM_MOUSE, GLPK_MOUSE	35.877
GOTERM_BP_DIRECT	GO:0030433~ER-associated ubiquitin-dependent protein catabolic process	5	2.08333	0.00290921	ECM29_MOUSE, DJC10_MOUSE, AUP1_MOUSE, PRS4_MOUSE, CCD47_MOUSE	8.39228
GOTERM_BP_DIRECT	GO:0015031~protein transport	15	6.25	0.00364738	RAP1A_MOUSE, SNF8_MOUSE, CHM4C_MOUSE, IMA7_MOUSE, LMAN1_MOUSE, MTX2_MOUSE, IMA3_MOUSE, CHM4B_MOUSE, PTN23_MOUSE, GBRL2_MOUSE, VPS52_MOUSE, RIPL1_MOUSE, NUP93_MOUSE, VP13A_MOUSE, CCD22_MOUSE	2.42412
GOTERM_BP_DIRECT	GO:0022900~electron transport chain	3	1.25	0.00368946	SDHA_MOUSE, NDUB3_MOUSE, NDUS4_MOUSE	31.8907
GOTERM_BP_DIRECT	GO:0007080~mitotic metaphase plate congression	4	1.66667	0.00522233	CHM4B_MOUSE, CDC23_MOUSE, CHM4C_MOUSE, BECN1_MOUSE	11.2555
GOTERM_BP_DIRECT	GO:0006418~tRNA aminoacylation for protein translation	4	1.66667	0.00613737	SYCM_MOUSE, SYRC_MOUSE, SYWM_MOUSE, SYNM_MOUSE	10.6302
GOTERM_BP_DIRECT	GO:0006123~mitochondrial electron transport, cytochrome c to oxygen	3	1.25	0.0066267	CYC_MOUSE, COX5A_MOUSE, CYC2_MOUSE	23.918
GOTERM_BP_DIRECT	GO:0006641~triglyceride metabolic process	4	1.66667	0.00767914	GLPK2_MOUSE, GLPK_MOUSE, SE1L1_MOUSE, CATA_MOUSE	9.81251
GOTERM_BP_DIRECT	GO:0033197~response to vitamin E	3	1.25	0.00777829	HMCS1_MOUSE, CATA_MOUSE, BECN1_MOUSE	22.0781
GOTERM_BP_DIRECT	GO:0006888~ER to Golgi vesicle-mediated transport	5	2.08333	0.00887869	NRBP_MOUSE, ERGI2_MOUSE, NRBP2_MOUSE, ANK1_MOUSE, LMAN1_MOUSE	6.13282
GOTERM_BP_DIRECT	GO:0042744~hydrogen peroxide catabolic process	3	1.25	0.009013	PRDX1_MOUSE, PRDX6_MOUSE, CATA_MOUSE	20.5011
GOTERM_BP_DIRECT	GO:2000279~negative regulation of DNA biosynthetic process	3	1.25	0.009013	CXA1_MOUSE, P53_MOUSE, BMPR2_MOUSE	20.5011
GOTERM_BP_DIRECT	GO:0006412~translation	11	4.58333	0.00938087	SYCM_MOUSE, RL36_MOUSE, RM43_MOUSE, SYRC_MOUSE, EF1G_MOUSE, IF4G3_MOUSE, SYWM_MOUSE, RL31_MOUSE, SYFB_MOUSE, RL35_MOUSE, SYNM_MOUSE	2.62442
GOTERM_BP_DIRECT	GO:0006457~protein folding	6	2.5	0.010901	TCPH_MOUSE, DNJA1_MOUSE, PFD2_MOUSE, DJB11_MOUSE, PFD5_MOUSE, HS90A_MOUSE	4.48462
GOTERM_BP_DIRECT	GO:0016310~phosphorylation	14	5.83333	0.0118004	MINK1_MOUSE, MARK3_MOUSE, WNK3_MOUSE, NDKA_MOUSE, WNK4_MOUSE, BMPR2_MOUSE, AGK_MOUSE, XYLK_MOUSE, NDKB_MOUSE, GLPK2_MOUSE, WNK1_MOUSE, KGP2_MOUSE, GLPK_MOUSE, PAK2_MOUSE	2.18857
GOTERM_BP_DIRECT	GO:0006979~response to oxidative stress	6	2.5	0.0127089	PRDX1_MOUSE, NDUS2_MOUSE, P53_MOUSE, MSRB2_MOUSE, CYTC_MOUSE, CATA_MOUSE	4.31603
GOTERM_BP_DIRECT	GO:0008380~RNA splicing	8	3.33333	0.0132032	HNRPQ_MOUSE, HNRPK_MOUSE, IF4A3_MOUSE, ESRP1_MOUSE, MBNL1_MOUSE, LC7L3_MOUSE, PRPF3_MOUSE, PTBP2_MOUSE	3.17583
GOTERM_BP_DIRECT	GO:0010976~positive regulation of neuron projection development	6	2.5	0.0147098	UB2V2_MOUSE, RAP1A_MOUSE, RHG35_MOUSE, NDKB_MOUSE, HNRPK_MOUSE, NDKA_MOUSE	4.15965
GOTERM_BP_DIRECT	GO:1903861~positive regulation of dendrite extension	3	1.25	0.0163702	CPNE6_MOUSE, HNRPK_MOUSE, SYT2_MOUSE	15.1061
GOTERM_BP_DIRECT	GO:0000302~response to reactive oxygen species	3	1.25	0.019833	PRDX1_MOUSE, PRDX6_MOUSE, CATA_MOUSE	13.6674
GOTERM_BP_DIRECT	GO:0042275~error-free postreplication DNA repair	2	0.833333	0.0206866	UB2V2_MOUSE, UB2V1_MOUSE	95.672
GOTERM_BP_DIRECT	GO:0050794~regulation of cellular process	2	0.833333	0.0206866	WNK1_MOUSE, WNK4_MOUSE	95.672
GOTERM_BP_DIRECT	GO:0007420~brain development	7	2.91667	0.0256121	HMCS1_MOUSE, BAG6_MOUSE, STMN1_MOUSE, NDUS4_MOUSE, SCOT1_MOUSE, CYTC_MOUSE, BMPR2_MOUSE	3.10048
GOTERM_BP_DIRECT	GO:0072661~protein targeting to plasma membrane	3	1.25	0.0296736	WNK3_MOUSE, KGP2_MOUSE, ANK1_MOUSE	11.0391
GOTERM_BP_DIRECT	GO:0045861~negative regulation of proteolysis	3	1.25	0.0296736	BAG6_MOUSE, P53_MOUSE, CYTC_MOUSE	11.0391
GOTERM_BP_DIRECT	GO:0001649~osteoblast differentiation	5	2.08333	0.0303634	CXA1_MOUSE, HNRPQ_MOUSE, RRAS2_MOUSE, CATA_MOUSE, CCD47_MOUSE	4.23327
GOTERM_BP_DIRECT	GO:0046167~glycerol-3-phosphate biosynthetic process	2	0.833333	0.0308698	GLPK2_MOUSE, GLPK_MOUSE	63.7813
GOTERM_BP_DIRECT	GO:0002762~negative regulation of myeloid leukocyte differentiation	2	0.833333	0.0308698	NDKB_MOUSE, NDKA_MOUSE	63.7813
GOTERM_BP_DIRECT	GO:0007029~endoplasmic reticulum organization	3	1.25	0.0318321	ATLA3_MOUSE, LMAN1_MOUSE, CCD47_MOUSE	10.6302
GOTERM_BP_DIRECT	GO:0051259~protein oligomerization	4	1.66667	0.0326151	CXA1_MOUSE, NDKB_MOUSE, RIR1_MOUSE, PPP5_MOUSE	5.71176
GOTERM_BP_DIRECT	GO:0016032~viral process	3	1.25	0.0340506	CUL1_MOUSE, P53_MOUSE, UBC9_MOUSE	10.2506
GOTERM_BP_DIRECT	GO:0043066~negative regulation of apoptotic process	12	5	0.0347817	ALBU_MOUSE, DNJA1_MOUSE, NDKB_MOUSE, HNRPK_MOUSE, YBOX3_MOUSE, ATAD3_MOUSE, BAG6_MOUSE, WNK3_MOUSE, P53_MOUSE, CATA_MOUSE, BECN1_MOUSE, PAK2_MOUSE	2.02838
GOTERM_BP_DIRECT	GO:0006915~apoptotic process	12	5	0.0363105	CXA1_MOUSE, CYC_MOUSE, CYC2_MOUSE, BAG6_MOUSE, PDCD6_MOUSE, CUL1_MOUSE, P53_MOUSE, CYTC_MOUSE, FIS1_MOUSE, DOCK1_MOUSE, BECN1_MOUSE, PAK2_MOUSE	2.01415
GOTERM_BP_DIRECT	GO:0017148~negative regulation of translation	4	1.66667	0.0377705	HNRPQ_MOUSE, IF4A3_MOUSE, CNOT2_MOUSE, SMAG2_MOUSE	5.38997
GOTERM_BP_DIRECT	GO:2001244~positive regulation of intrinsic apoptotic signaling pathway	3	1.25	0.0386614	CYC2_MOUSE, P53_MOUSE, FIS1_MOUSE	9.5672
GOTERM_BP_DIRECT	GO:0000281~mitotic cytokinesis	3	1.25	0.0386614	CHM4B_MOUSE, STMN1_MOUSE, KIF4_MOUSE	9.5672
GOTERM_BP_DIRECT	GO:1901888~regulation of cell junction assembly	2	0.833333	0.0409476	RAP1A_MOUSE, RAP1B_MOUSE	47.836
GOTERM_BP_DIRECT	GO:0010638~positive regulation of organelle organization	2	0.833333	0.0409476	ANK1_MOUSE, LMAN1_MOUSE	47.836
GOTERM_BP_DIRECT	GO:0046677~response to antibiotic	3	1.25	0.0410509	P53_MOUSE, HEM4_MOUSE, HS90A_MOUSE	9.25858
GOTERM_BP_DIRECT	GO:0007399~nervous system development	9	3.75	0.0437907	RAP1A_MOUSE, MOBP_MOUSE, SDHA_MOUSE, STMN1_MOUSE, ELP3_MOUSE, MBNL1_MOUSE, NRBP2_MOUSE, NDKA_MOUSE, VP13A_MOUSE	2.28395
GOTERM_BP_DIRECT	GO:0050679~positive regulation of epithelial cell proliferation	4	1.66667	0.0447629	NDKB_MOUSE, ESRP1_MOUSE, NDKA_MOUSE, KIF3A_MOUSE	5.03537
GOTERM_BP_DIRECT	GO:1900026~positive regulation of substrate adhesion-dependent cell spreading	3	1.25	0.0459912	RAC3_MOUSE, PREX1_MOUSE, DOCK1_MOUSE	8.69745
GOTERM_BP_DIRECT	GO:0098609~cell-cell adhesion	6	2.5	0.0479851	NHRF2_MOUSE, PRDX1_MOUSE, PRDX6_MOUSE, SYRC_MOUSE, EF1G_MOUSE, GAPD1_MOUSE	3.03721
GOTERM_BP_DIRECT	GO:0000422~mitophagy	3	1.25	0.0485393	GBRL2_MOUSE, FIS1_MOUSE, BECN1_MOUSE	8.44164
GOTERM_BP_DIRECT	GO:0002181~cytoplasmic translation	3	1.25	0.0485393	RL36_MOUSE, RLA2_MOUSE, RL31_MOUSE	8.44164
GOTERM_BP_DIRECT	GO:0007030~Golgi organization	4	1.66667	0.0492453	ATLA3_MOUSE, NSF1C_MOUSE, LMAN1_MOUSE, GOGA5_MOUSE	4.84415
GOTERM_BP_DIRECT	GO:0060548~negative regulation of cell death	4	1.66667	0.0507865	CHM4B_MOUSE, PPP5_MOUSE, CYTC_MOUSE, BECN1_MOUSE	4.7836
GOTERM_BP_DIRECT	GO:1903955~positive regulation of protein targeting to mitochondrion	4	1.66667	0.0507865	XYLK_MOUSE, UB2L3_MOUSE, HUWE1_MOUSE, GLSL_MOUSE	4.7836
GOTERM_BP_DIRECT	GO:0071816~tail-anchored membrane protein insertion into ER membrane	2	0.833333	0.0509211	UBL4A_MOUSE, BAG6_MOUSE	38.2688
GOTERM_BP_DIRECT	GO:0090611~ubiquitin-independent protein catabolic process via the multivesicular body sorting pathway	2	0.833333	0.0509211	CHM4B_MOUSE, CHM4C_MOUSE	38.2688
GOTERM_BP_DIRECT	GO:2000301~negative regulation of synaptic vesicle exocytosis	2	0.833333	0.0509211	RAP1A_MOUSE, RAP1B_MOUSE	38.2688
GOTERM_BP_DIRECT	GO:0070059~intrinsic apoptotic signaling pathway in response to endoplasmic reticulum stress	3	1.25	0.0537845	DJC10_MOUSE, BAG6_MOUSE, P53_MOUSE	7.97266
GOTERM_BP_DIRECT	GO:0006470~protein dephosphorylation	5	2.08333	0.0560655	PPM1H_MOUSE, PTN23_MOUSE, PPM1M_MOUSE, PPP5_MOUSE, PPM1J_MOUSE	3.46638
GOTERM_BP_DIRECT	GO:0042981~regulation of apoptotic process	6	2.5	0.0571251	NDKB_MOUSE, BAG6_MOUSE, P53_MOUSE, NDKA_MOUSE, GLSL_MOUSE, PAK2_MOUSE	2.88458
GOTERM_BP_DIRECT	GO:0031175~neuron projection development	5	2.08333	0.0572783	JIP3_MOUSE, SNAPN_MOUSE, RAC3_MOUSE, CAMP1_MOUSE, NPTXR_MOUSE	3.44144
GOTERM_BP_DIRECT	GO:0072593~reactive oxygen species metabolic process	3	1.25	0.0592201	PREX1_MOUSE, NDUS4_MOUSE, GLSL_MOUSE	7.55305
GOTERM_BP_DIRECT	GO:0006810~transport	27	11.25	0.0598526	KI16B_MOUSE, SNF8_MOUSE, BAG6_MOUSE, NDUS2_MOUSE, NDUB3_MOUSE, NDUA5_MOUSE, CHM4C_MOUSE, NDUS4_MOUSE, LMAN1_MOUSE, UBL4A_MOUSE, PTN23_MOUSE, LMBD1_MOUSE, GBRL2_MOUSE, SDHA_MOUSE, ERGI2_MOUSE, RIPL1_MOUSE, VP13A_MOUSE, CCD22_MOUSE, CYC2_MOUSE, IMA7_MOUSE, MTX2_MOUSE, ALBU_MOUSE, IMA3_MOUSE, CHM4B_MOUSE, VPS52_MOUSE, ATP5L_MOUSE, NUP93_MOUSE	1.41775
GOTERM_BP_DIRECT	GO:0097485~neuron projection guidance	2	0.833333	0.0607915	RHG35_MOUSE, DPYL4_MOUSE	31.8907
GOTERM_BP_DIRECT	GO:0016556~mRNA modification	2	0.833333	0.0607915	DJB11_MOUSE, RED1_MOUSE	31.8907
GOTERM_BP_DIRECT	GO:0010766~negative regulation of sodium ion transport	2	0.833333	0.0607915	WNK1_MOUSE, WNK4_MOUSE	31.8907
GOTERM_BP_DIRECT	GO:0034605~cellular response to heat	3	1.25	0.0620061	PDCD6_MOUSE, P53_MOUSE, CETN1_MOUSE	7.35938
GOTERM_BP_DIRECT	GO:0043123~positive regulation of I-kappaB kinase/NF-kappaB signaling	5	2.08333	0.0701739	CXA1_MOUSE, PPP5_MOUSE, UB2V1_MOUSE, CCD22_MOUSE, UBC9_MOUSE	3.21047
GOTERM_BP_DIRECT	GO:0031468~nuclear envelope reassembly	2	0.833333	0.0705597	CHM4B_MOUSE, NSF1C_MOUSE	27.3348
GOTERM_BP_DIRECT	GO:0050792~regulation of viral process	2	0.833333	0.0705597	CHM4B_MOUSE, CHM4C_MOUSE	27.3348
GOTERM_BP_DIRECT	GO:0006220~pyrimidine nucleotide metabolic process	2	0.833333	0.080227	NDKB_MOUSE, NDKA_MOUSE	23.918
GOTERM_BP_DIRECT	GO:0006163~purine nucleotide metabolic process	2	0.833333	0.080227	NDKB_MOUSE, NDKA_MOUSE	23.918
GOTERM_BP_DIRECT	GO:0030163~protein catabolic process	3	1.25	0.0857739	BACE1_MOUSE, PRS4_MOUSE, UCHL3_MOUSE	6.10672
GOTERM_BP_DIRECT	GO:0043280~positive regulation of cysteine-type endopeptidase activity involved in apoptotic process	3	1.25	0.0889128	CYC2_MOUSE, PDCD6_MOUSE, FIS1_MOUSE	5.9795
GOTERM_BP_DIRECT	GO:0006241~CTP biosynthetic process	2	0.833333	0.0897941	NDKB_MOUSE, NDKA_MOUSE	21.2604
GOTERM_BP_DIRECT	GO:0048024~regulation of mRNA splicing, via spliceosome	2	0.833333	0.0897941	KHDR2_MOUSE, KHDR1_MOUSE	21.2604
GOTERM_BP_DIRECT	GO:0042743~hydrogen peroxide metabolic process	2	0.833333	0.0897941	CYC_MOUSE, CYC2_MOUSE	21.2604
GOTERM_BP_DIRECT	GO:0006228~UTP biosynthetic process	2	0.833333	0.0897941	NDKB_MOUSE, NDKA_MOUSE	21.2604
GOTERM_BP_DIRECT	GO:0009743~response to carbohydrate	2	0.833333	0.0897941	RAP1B_MOUSE, CYTC_MOUSE	21.2604
GOTERM_BP_DIRECT	GO:0007010~cytoskeleton organization	4	1.66667	0.0943588	CGT_MOUSE, CAP1_MOUSE, CAMP1_MOUSE, DOCK1_MOUSE	3.67969
GOTERM_BP_DIRECT	GO:0007264~small GTPase mediated signal transduction	6	2.5	0.0991098	RAP1A_MOUSE, RHG35_MOUSE, RAC3_MOUSE, RAP1B_MOUSE, RRAS2_MOUSE, DOCK1_MOUSE	2.43234
GOTERM_BP_DIRECT	GO:0006983~ER overload response	2	0.833333	0.0992623	P53_MOUSE, CCD47_MOUSE	19.1344
GOTERM_BP_DIRECT	GO:1902188~positive regulation of viral release from host cell	2	0.833333	0.0992623	CHM4B_MOUSE, CHM4C_MOUSE	19.1344
GOTERM_BP_DIRECT	GO:0032486~Rap protein signal transduction	2	0.833333	0.0992623	RAP1A_MOUSE, RAP1B_MOUSE	19.1344

## Sheet: Additional Table 10
Male GO_KEGG Pathways
Highlighted = Top 10
Category	Term	Count	%	PValue	Genes	Fold Enrichment
KEGG_PATHWAY	mmu05012:Parkinson's disease	9	3.75	0.000481363	CYC_MOUSE, COX5A_MOUSE, UB2L3_MOUSE, CYC2_MOUSE, SDHA_MOUSE, NDUS2_MOUSE, NDUB3_MOUSE, NDUA5_MOUSE, NDUS4_MOUSE	4.83914
KEGG_PATHWAY	mmu05010:Alzheimer's disease	9	3.75	0.00148491	CYC_MOUSE, COX5A_MOUSE, CYC2_MOUSE, BACE1_MOUSE, SDHA_MOUSE, NDUS2_MOUSE, NDUB3_MOUSE, NDUA5_MOUSE, NDUS4_MOUSE	4.07362
KEGG_PATHWAY	mmu05016:Huntington's disease	9	3.75	0.00299966	CYC_MOUSE, COX5A_MOUSE, CYC2_MOUSE, SDHA_MOUSE, NDUS2_MOUSE, NDUB3_MOUSE, NDUA5_MOUSE, P53_MOUSE, NDUS4_MOUSE	3.64157
KEGG_PATHWAY	mmu04932:Non-alcoholic fatty liver disease (NAFLD)	8	3.33333	0.00317778	CYC_MOUSE, COX5A_MOUSE, CYC2_MOUSE, SDHA_MOUSE, NDUS2_MOUSE, NDUB3_MOUSE, NDUA5_MOUSE, NDUS4_MOUSE	4.08227
KEGG_PATHWAY	mmu04141:Protein processing in endoplasmic reticulum	8	3.33333	0.00461695	DNJA1_MOUSE, DJC10_MOUSE, CUL1_MOUSE, NSF1C_MOUSE, DJB11_MOUSE, SE1L1_MOUSE, LMAN1_MOUSE, HS90A_MOUSE	3.81498
KEGG_PATHWAY	mmu00190:Oxidative phosphorylation	7	2.91667	0.00729291	COX5A_MOUSE, SDHA_MOUSE, NDUS2_MOUSE, NDUB3_MOUSE, NDUA5_MOUSE, ATP5L_MOUSE, NDUS4_MOUSE	4.03455
KEGG_PATHWAY	mmu00970:Aminoacyl-tRNA biosynthesis	5	2.08333	0.00878046	SYCM_MOUSE, SYRC_MOUSE, SYWM_MOUSE, SYFB_MOUSE, SYNM_MOUSE	6.06929
KEGG_PATHWAY	mmu04010:MAPK signaling pathway	9	3.75	0.0121274	JIP3_MOUSE, RAP1A_MOUSE, RAC3_MOUSE, RAP1B_MOUSE, STMN1_MOUSE, PPP5_MOUSE, P53_MOUSE, RRAS2_MOUSE, PAK2_MOUSE	2.87263
KEGG_PATHWAY	mmu05014:Amyotrophic lateral sclerosis (ALS)	4	1.66667	0.024804	CYC_MOUSE, CYC2_MOUSE, P53_MOUSE, CATA_MOUSE	6.2835
KEGG_PATHWAY	mmu04120:Ubiquitin mediated proteolysis	6	2.5	0.0308214	UB2L3_MOUSE, CDC23_MOUSE, CUL1_MOUSE, UBC12_MOUSE, HUWE1_MOUSE, UBC9_MOUSE	3.38512
KEGG_PATHWAY	mmu01100:Metabolic pathways	24	10	0.0333015	HMCS1_MOUSE, COX5A_MOUSE, PRDX6_MOUSE, RPAC1_MOUSE, NDUS2_MOUSE, NDUB3_MOUSE, RIR1_MOUSE, NDUA5_MOUSE, NDUS4_MOUSE, NDKA_MOUSE, TALDO_MOUSE, GLSL_MOUSE, AGK_MOUSE, DYR_MOUSE, CGT_MOUSE, NDKB_MOUSE, MCCB_MOUSE, GLPK2_MOUSE, SDHA_MOUSE, NAMPT_MOUSE, ADAS_MOUSE, ATP5L_MOUSE, GLPK_MOUSE, HEM4_MOUSE	1.51517
KEGG_PATHWAY	mmu04510:Focal adhesion	7	2.91667	0.0425367	RAP1A_MOUSE, RHG35_MOUSE, RAC3_MOUSE, RAP1B_MOUSE, LAMA3_MOUSE, DOCK1_MOUSE, PAK2_MOUSE	2.70919
KEGG_PATHWAY	mmu05210:Colorectal cancer	4	1.66667	0.0442884	CYC_MOUSE, CYC2_MOUSE, RAC3_MOUSE, P53_MOUSE	5.00716
KEGG_PATHWAY	mmu05416:Viral myocarditis	4	1.66667	0.0738024	CYC_MOUSE, CYC2_MOUSE, RAC3_MOUSE, IF4G3_MOUSE	4.05643
KEGG_PATHWAY	mmu05222:Small cell lung cancer	4	1.66667	0.0851744	CYC_MOUSE, CYC2_MOUSE, LAMA3_MOUSE, P53_MOUSE	3.81498
